# Supplementary material for: Total synthesis of the plant alkaloid racemic microthecaline A: first example of a natural product bearing a tricyclic quinoline-serrulatane scaffold
Source: Royal Society of Chemistry journal article supplement (doi:10.1039/c9ra04675e), 2019-01-01
Supplement: c9ra04675e1.pdf [file c9ra04675e1.pdf]

## **Supporting information**

### **Total synthesis of the plant alkaloid racemic Microthecaline A: First example of a natural product bearing tricyclic quinoline-serrulatane scaffold**

Thirupathi Reddy Penjarla,<sup>a,b</sup> Maheshwar Kundarapu<sup>b</sup>, Syed Mohd. Baquer,<sup>b</sup> and Anupam Bhattacharya<sup>a\*</sup>

<sup>a</sup>Department of Chemistry, Birla Institute of Technology and Science-Pilani (Hyderabad Campus), Hyderabad-500078, India.

<sup>b</sup>Department of Medicinal Chemistry, GVK Biosciences Pvt. Ltd., Survey Nos: 125 (part) & 126, IDA Mallapur, Hyderabad 500076, India

E-mail: [anupam@hyderabad.bits-pilani.ac.in](mailto:anupam@hyderabad.bits-pilani.ac.in); Fax: +91-40-66303998; Tel: +91-40- 66303522.

#### **Contents:**

**Page S2:** Procedure for the synthesis of ethyl 4-bromo-6-methoxy-8-methylquinoline-3-carboxylate (1)

**Page S3-S49:** <sup>1</sup>H and <sup>13</sup>C NMR spectra of the synthesized compounds.

**Page S50:** NMR data comparison of microthecaline A (reported) and synthesized (±)-mirothecaline A.

Synthesis of ethyl 4-bromo-6-methoxy-8-methylquinoline-3-carboxylate (1) was accomplished in three steps as described below.

**Diethyl 2-(((4-methoxy-2-methylphenyl)amino)methylene)malonate (a).** To a stirred solution of 4-methoxy-2-methylaniline (5 g, 36.4 mmol) in dry toluene (50 mL) was added diethyl 2-(methoxymethylene)malonate (7.37 g, 36.4 mmol) and the reaction was refluxed for 12 h. On completion, the reaction mixture was cooled to room temperature, toluene was evaporated and the residue was taken in hexane and stirred for 1 hour. The solids thus obtained were filtered and dried to afford the required molecule in 94% yield (10.5 g); m.p. 99-101°C. <sup>1</sup>H NMR (400 MHz, CDCl<sub>3</sub>) δ: 11.04 – 11.01 (d, *J* = 13.2 Hz, 1H), 8.44 – 8.41 (d, *J* = 13.6 Hz, 1H), 7.14 – 7.12 (d, *J* = 8.8 Hz, 1H), 6.8 – 6.7 (m, 2H), 4.3 – 4.2 (q, 4H), 3.79 (s, 3H), 2.34 (s, 3H), 1.4 – 1.3 (t, 6H); <sup>13</sup>C NMR (100 MHz, CDCl<sub>3</sub>) δ: 169.4, 165.9, 157, 153.3, 131.6, 129.4, 117.8, 116.5, 112.3, 92.5, 60.2, 59.8, 55.4, 17.7, 14.4, 14.3; *v*<sub>max</sub> (KBr)/cm<sup>-1</sup>: 2944, 1721, 1427; HRMS-ESI (+) *m/z*: calcd for C<sub>16</sub>H<sub>22</sub>NO<sub>5</sub> [M + H]<sup>+</sup>, 308.1492; found, 308.1496.

**Ethyl 4-hydroxy-6-methoxy-8-methylquinoline-3-carboxylate (b).** A stirred solution of **a** (10 g, 32.5 mmol) in diphenyl ether (100 mL) was heated to reflux for 2 hours. The reaction mixture was cooled to room temperature and diluted with hexane. The solids thus obtained were filtered and dried to afford **b** in 76% yield (6.5 g); m.p. 266-268°C. <sup>1</sup>H NMR (400 MHz, CDCl<sub>3</sub>) δ: 8.93 (s, 1H), 7.47 – 7.46 (d, *J* = 2.8 Hz, 1H), 7.3 – 7.2 (m, 1H), 4.5 – 4.4 (q, *J* = 7.2 Hz, 2H), 3.96 (s, 3H), 2.75 (s, 3H), 1.47 – 1.44 (t, *J* = 7.2 Hz, 3H); <sup>13</sup>C NMR (100 MHz, CDCl<sub>3</sub>) δ: 172.9, 164.9, 156.1, 143.2, 132.1, 130, 129.1, 128.8, 123.4, 122.6, 118.6, 108.6, 103.5, 59.5, 55.3, 16.9, 14.3; *v*<sub>max</sub> (KBr)/cm<sup>-1</sup>: 3250, 2474, 1702; HRMS-ESI (+) *m/z*: calcd for C<sub>14</sub>H<sub>16</sub>NO<sub>4</sub> [M + H]<sup>+</sup>, 262.1074; found, 262.1064.

**Ethyl 4-bromo-6-methoxy-8-methylquinoline-3-carboxylate (1).** To a stirred solution of **b** (5 g, 19.1 mmol) in DMF (50 mL) was added POBr<sub>3</sub> (2.33 mL, 22.9 mmol) drop wise at 0°C and the resulting mixture was left to stir at room temperature for 2 hours. On completion, the reaction mixture was diluted with water and solids obtained were filtered and dried to afford **1** in 84% yield (5.2 g); m.p. 117-119°C. <sup>1</sup>H NMR (400 MHz, CDCl<sub>3</sub>) δ: 8.93 (s, 1H), 7.47 – 7.46 (d, *J* = 2.8 Hz, 1H), 7.3 – 7.2 (m, 1H), 7.26 (d, *J* = 2.4 Hz, 1H), 4.24 – 4.18 (q, *J* = 7.2 Hz, 2H), 3.8 (s, 3H), 2.5 (s, 3H), 1.29 – 1.26 (t, *J* = 7.2 Hz, 3H); <sup>13</sup>C NMR (100 MHz, CDCl<sub>3</sub>) δ: 165.6, 158.9, 145.6, 144.7, 139.6, 132.9, 128.9, 126.3, 124.5, 103.6, 62, 55.5, 18.2, 14.2; *v*<sub>max</sub> (KBr)/cm<sup>-1</sup>: 3414, 2946, 1720; HRMS-ESI (+) *m/z*: calcd for C<sub>14</sub>H<sub>15</sub>BrNO<sub>3</sub> [M + H]<sup>+</sup>, 324.023; found, 324.022.

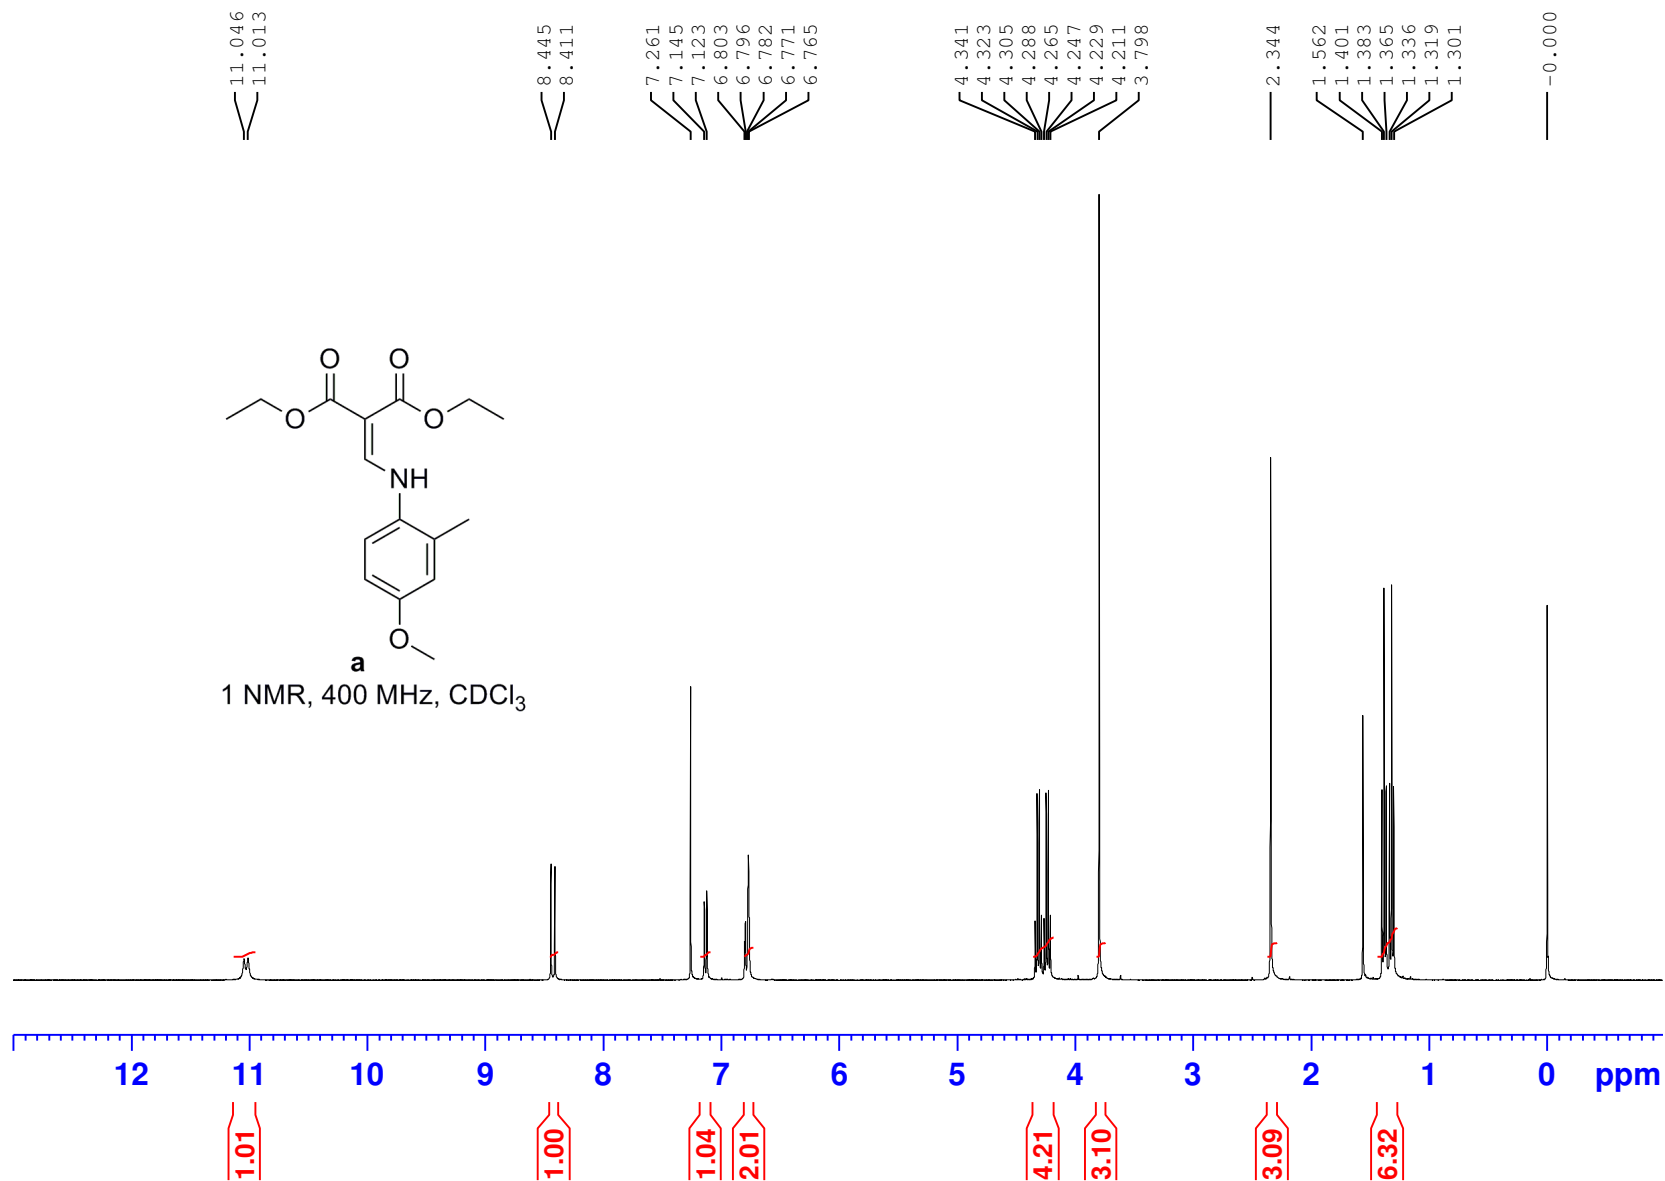

Current Data Parameters  
 NAME 511903B9688  
 EXPNO 1  
 PROCNO 1

F2 - Acquisition Parameters  
 Date\_ 20190322  
 Time 7.48  
 INSTRUM spect  
 PROBHD 5 mm PABBO BB/  
 PULPROG zg30  
 TD 65536  
 SOLVENT CDCl3  
 NS 8  
 DS 2  
 SWH 8012.820 Hz  
 FIDRES 0.122266 Hz  
 AQ 4.0894465 sec  
 RG 86.08  
 DW 62.400 usec  
 DE 6.50 usec  
 TE 298.2 K  
 D1 1.00000000 sec  
 TD0 1

===== CHANNEL f1 =====  
 SFO1 400.1324710 MHz  
 NUC1 1H  
 P1 9.75 usec  
 PLW1 16.00000000 W

F2 - Processing parameters  
 SI 65536  
 SF 400.1300091 MHz  
 WDW EM  
 SSB 0  
 LB 0.30 Hz  
 GB 0  
 PC 1.00

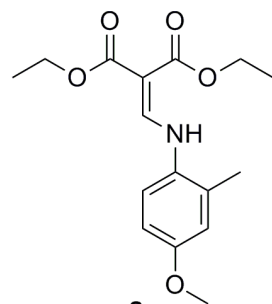

**a**  
13C NMR, 100 MHz, CDCl<sub>3</sub>

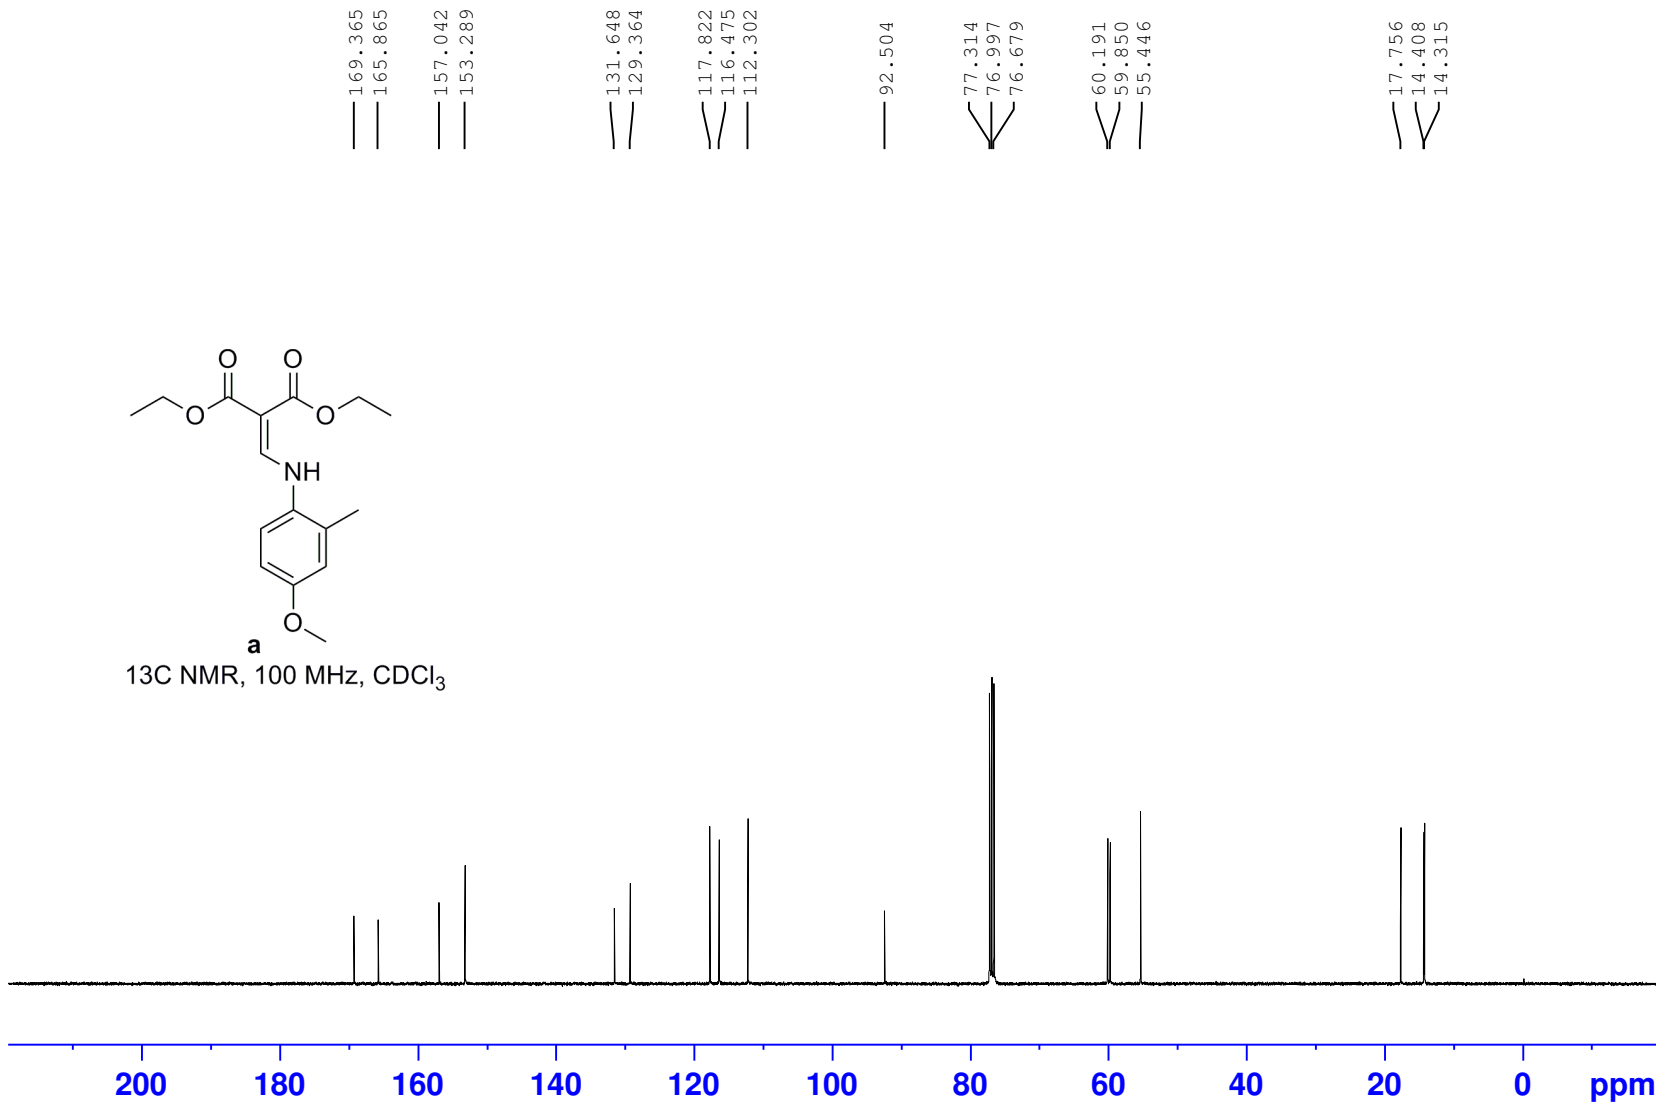

Current Data Parameters  
 NAME 511903C0626  
 EXPNO 2  
 PROCNO 1

F2 - Acquisition Parameters  
 Date\_ 20190323  
 Time 20.44  
 INSTRUM spect  
 PROBHD 5 mm PABBO BB/  
 PULPROG zgpg30  
 TD 65536  
 SOLVENT CDC13  
 NS 1024  
 DS 4  
 SWH 24038.461 Hz  
 FIDRES 0.366798 Hz  
 AQ 1.3631488 sec  
 RG 195.29  
 DW 20.800 usec  
 DE 6.50 usec  
 TE 299.3 K  
 D1 3.00000000 sec  
 D11 0.03000000 sec  
 TD0 1

==== CHANNEL f1 =====  
 SFO1 100.6228293 MHz  
 NUC1 13C  
 P1 10.00 usec  
 PLW1 78.00000000 W

==== CHANNEL f2 =====  
 SFO2 400.1316005 MHz  
 NUC2 1H  
 CPDPRG[2] waltz16  
 PCPD2 90.00 usec  
 PLW2 16.00000000 W  
 PLW12 0.18777999 W  
 PLW13 0.15210000 W

F2 - Processing parameters  
 SI 32768  
 SF 100.6127733 MHz  
 WDW EM  
 SSB 0  
 LB 1.00 Hz  
 GB 0  
 PC 1.40

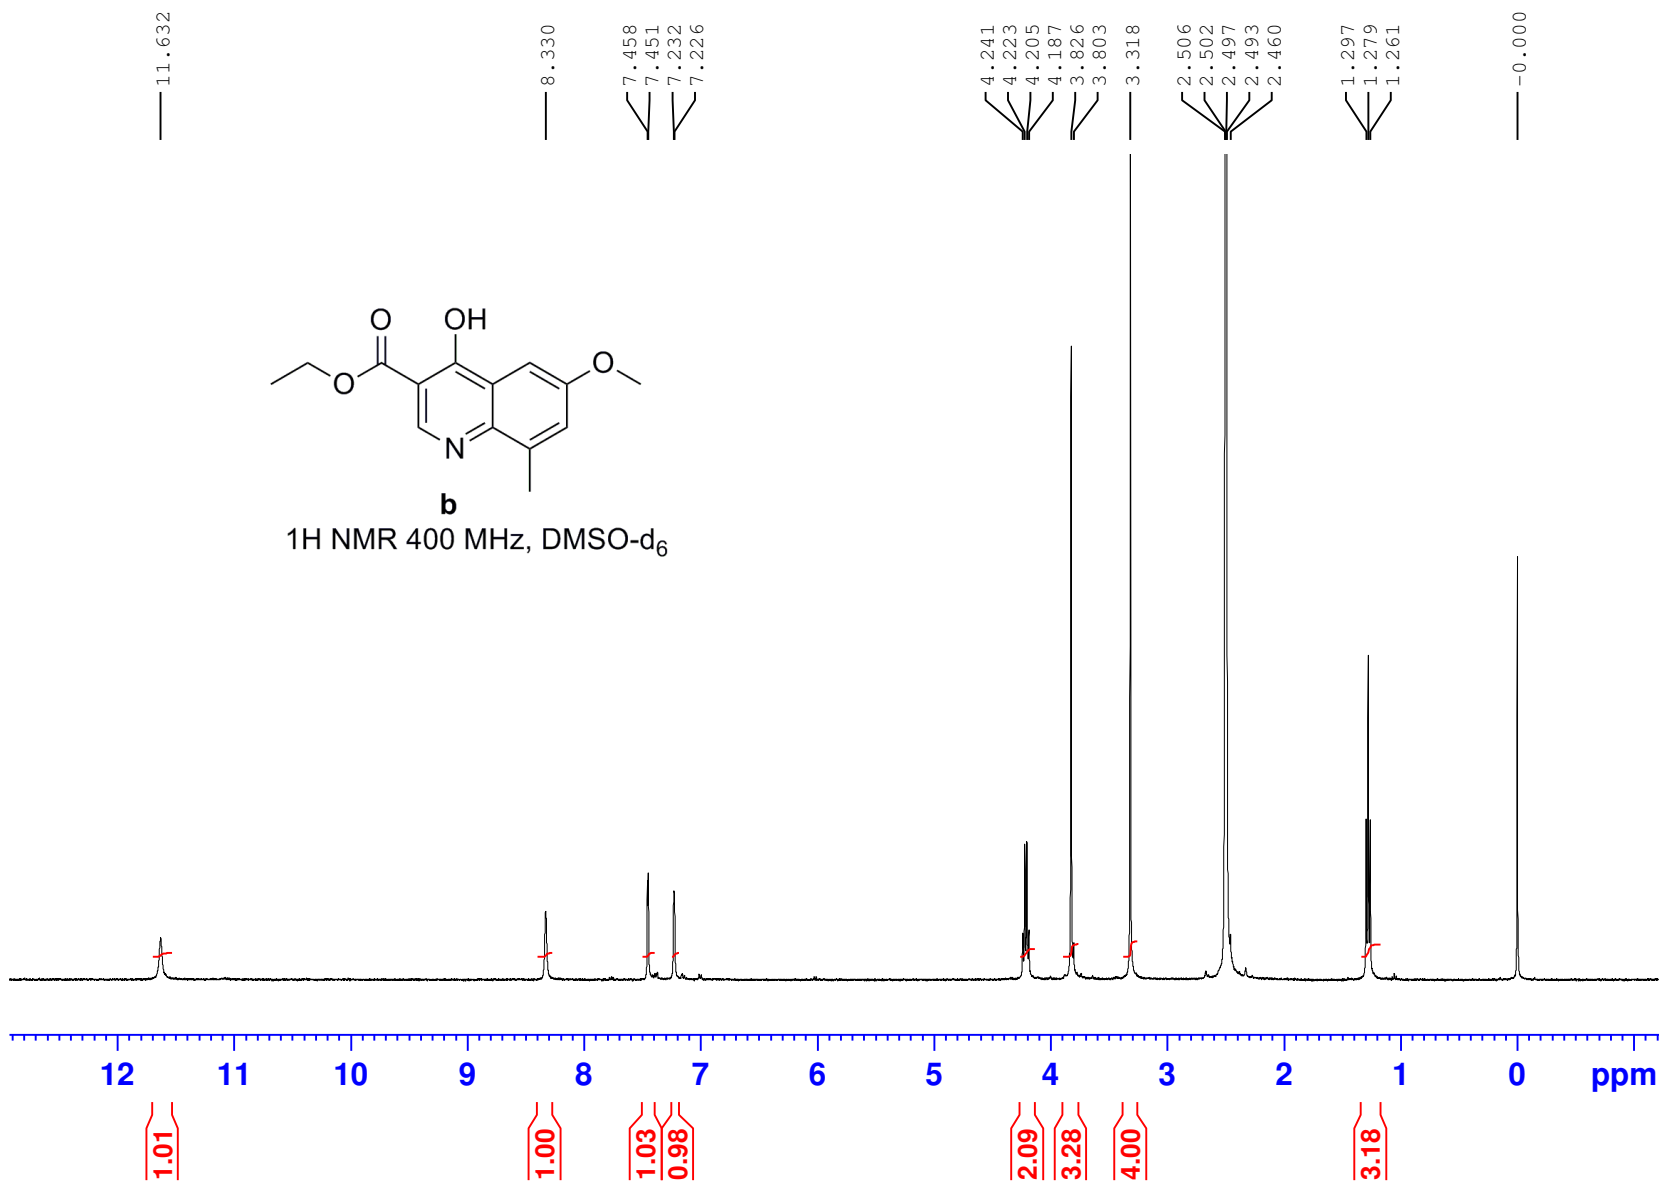

Current Data Parameters  
 NAME 511903B9689  
 EXPNO 1  
 PROCNO 1

F2 - Acquisition Parameters  
 Date\_ 20190322  
 Time 9.26  
 INSTRUM spect  
 PROBHD 5 mm PABBO BB/  
 PULPROG zg30  
 TD 65536  
 SOLVENT DMSO  
 NS 8  
 DS 2  
 SWH 8012.820 Hz  
 FIDRES 0.122266 Hz  
 AQ 4.0894465 sec  
 RG 195.29  
 DW 62.400 usec  
 DE 6.50 usec  
 TE 298.2 K  
 D1 1.00000000 sec  
 TD0 1

===== CHANNEL f1 =====  
 SFO1 400.1324710 MHz  
 NUC1 1H  
 P1 9.75 usec  
 PLW1 16.00000000 W

F2 - Processing parameters  
 SI 65536  
 SF 400.1300023 MHz  
 WDW EM  
 SSB 0  
 LB 0.30 Hz  
 GB 0  
 PC 1.00

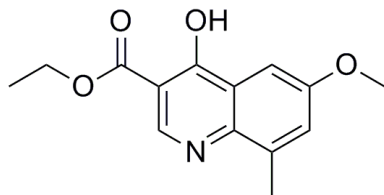

**b**

<sup>13</sup>C NMR 100 MHz, DMSO-d<sub>6</sub>

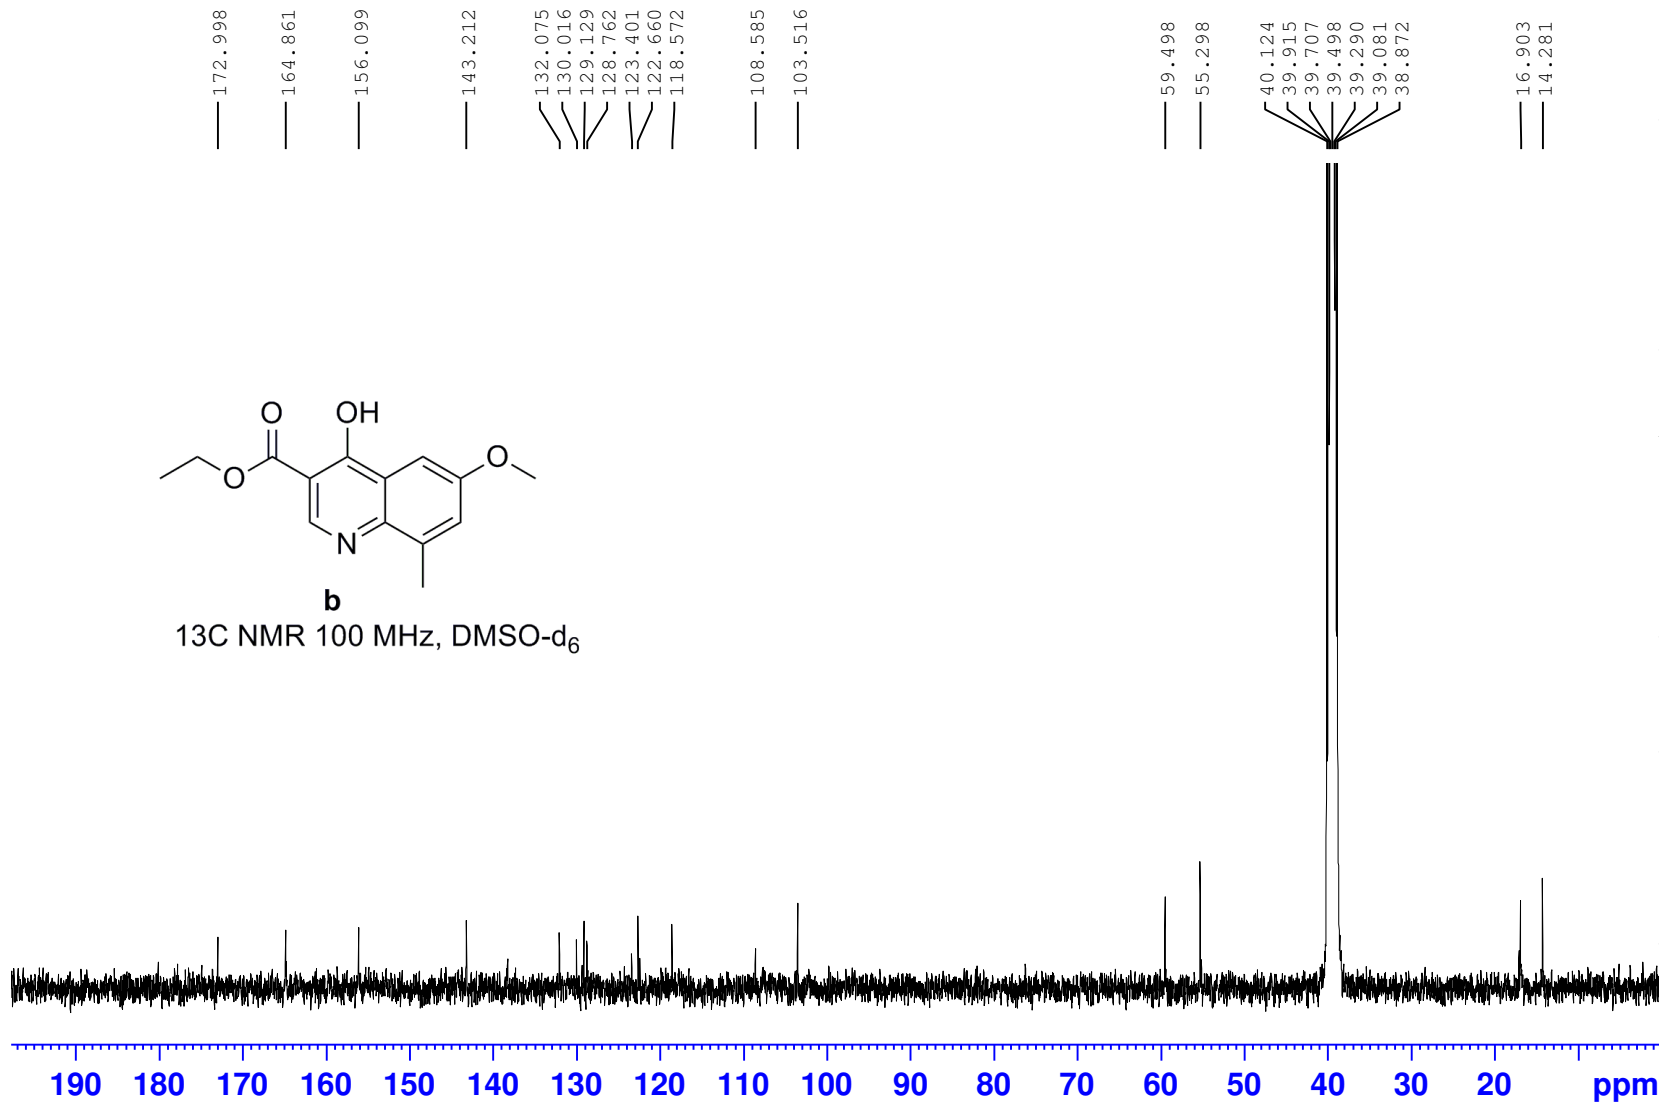

Current Data Parameters  
 NAME 511903C0559  
 EXPNO 2  
 PROCNO 1

F2 - Acquisition Parameters  
 Date\_ 20190323  
 Time 12.41  
 INSTRUM spect  
 PROBHD 5 mm PABBO BB/  
 PULPROG zgpg30  
 TD 65536  
 SOLVENT DMSO  
 NS 1024  
 DS 4  
 SWH 24038.461 Hz  
 FIDRES 0.366798 Hz  
 AQ 1.3631488 sec  
 RG 195.29  
 DW 20.800 usec  
 DE 6.50 usec  
 TE 298.3 K  
 D1 3.00000000 sec  
 D11 0.03000000 sec  
 TD0 1

===== CHANNEL f1 =====  
 SFO1 100.6228293 MHz  
 NUC1 13C  
 P1 10.00 usec  
 PLW1 78.00000000 W

===== CHANNEL f2 =====  
 SFO2 400.1316005 MHz  
 NUC2 1H  
 CPDPRG[2] waltz16  
 PCPD2 90.00 usec  
 PLW2 16.00000000 W  
 PLW12 0.18777999 W  
 PLW13 0.15210000 W

F2 - Processing parameters  
 SI 32768  
 SF 100.6128190 MHz  
 WDW EM  
 SSB 0  
 LB 2.00 Hz  
 GB 0  
 PC 1.40

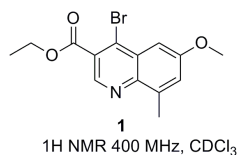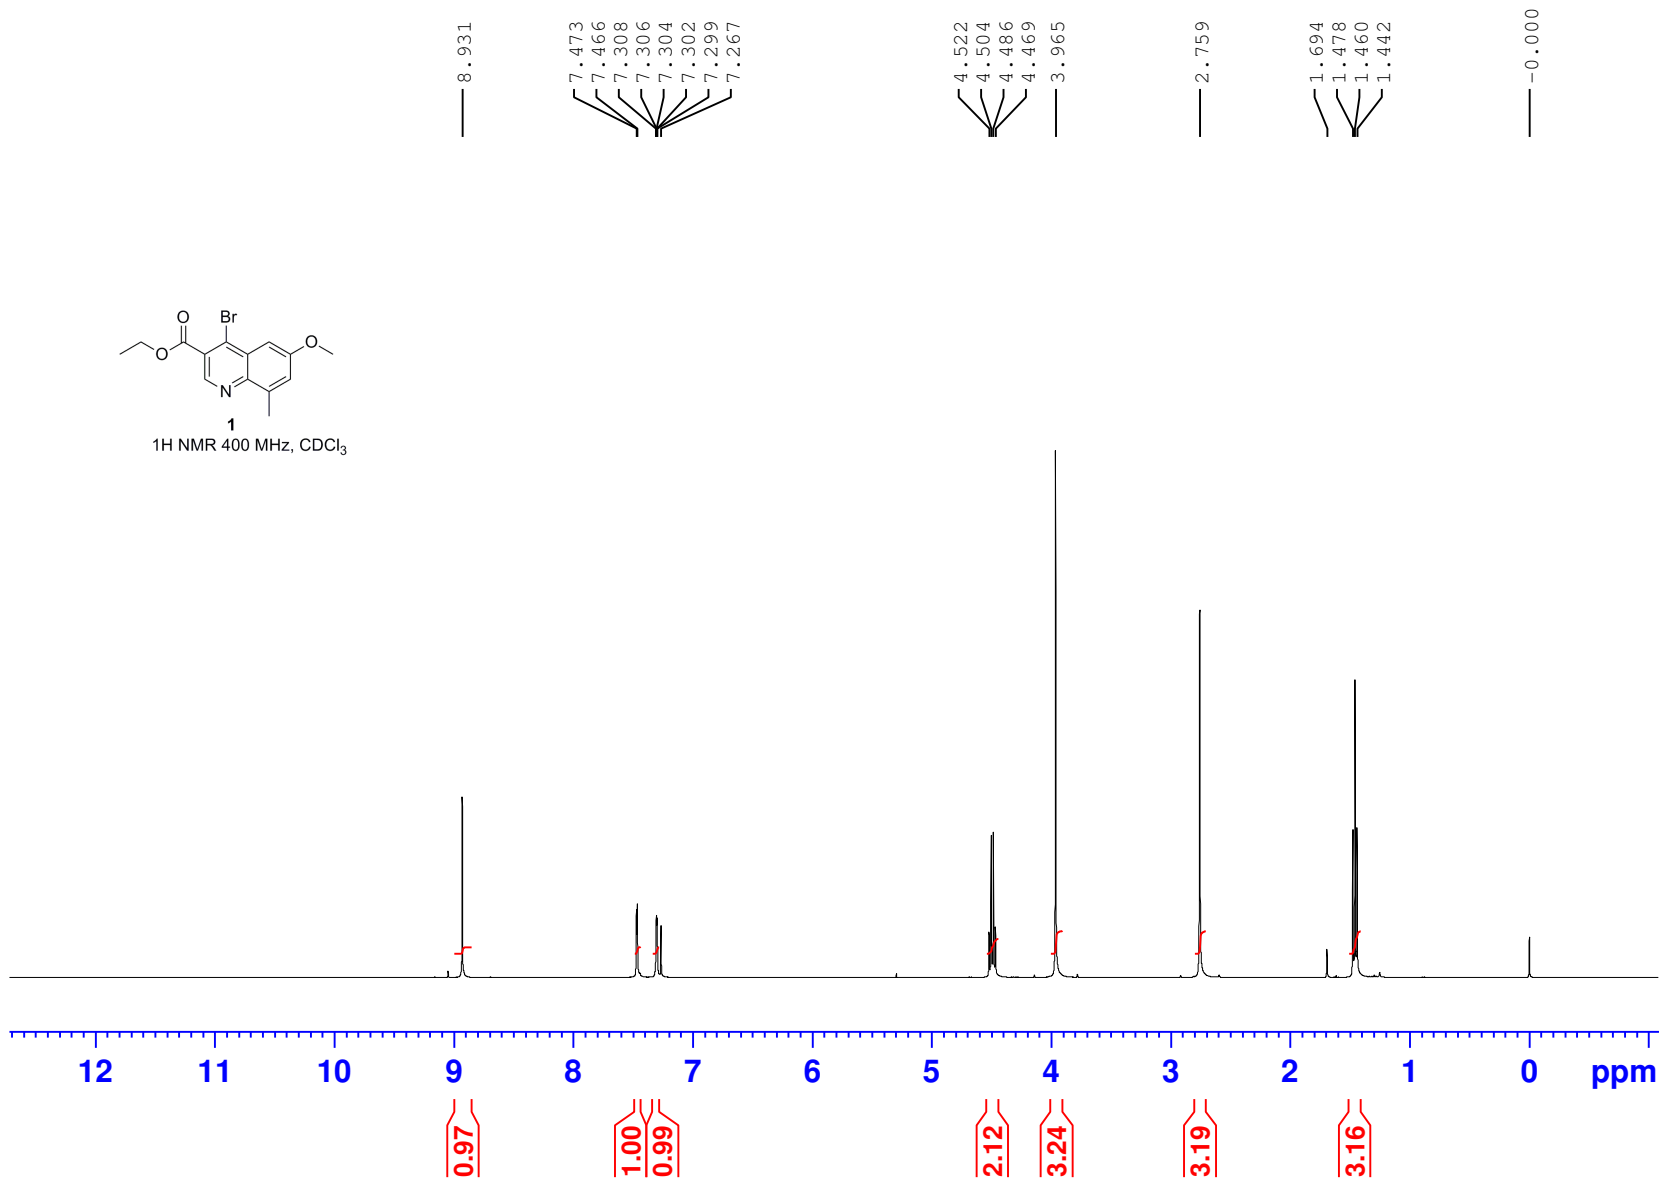

Current Data Parameters  
 NAME 511903C1078  
 EXPNO 1  
 PROCNO 1

F2 - Acquisition Parameters  
 Date\_ 20190325  
 Time 20.12  
 INSTRUM spect  
 PROBHD 5 mm PABBO BB/  
 PULPROG zg30  
 TD 65536  
 SOLVENT CDCl3  
 NS 16  
 DS 2  
 SWH 8012.820 Hz  
 FIDRES 0.122266 Hz  
 AQ 4.0894465 sec  
 RG 86.08  
 DW 62.400 usec  
 DE 6.50 usec  
 TE 298.1 K  
 D1 1.00000000 sec  
 TD0 1

===== CHANNEL f1 =====  
 SFO1 400.1324710 MHz  
 NUC1 1H  
 P1 9.75 usec  
 PLW1 16.00000000 W

F2 - Processing parameters  
 SI 65536  
 SF 400.1300065 MHz  
 WDW EM  
 SSB 0  
 LB 0.30 Hz  
 GB 0  
 PC 1.00

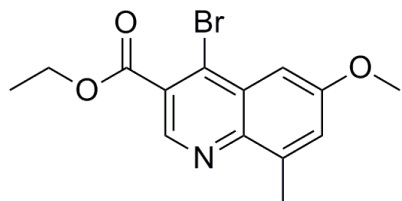

1

<sup>13</sup>C NMR 100 MHz, CDCl<sub>3</sub>

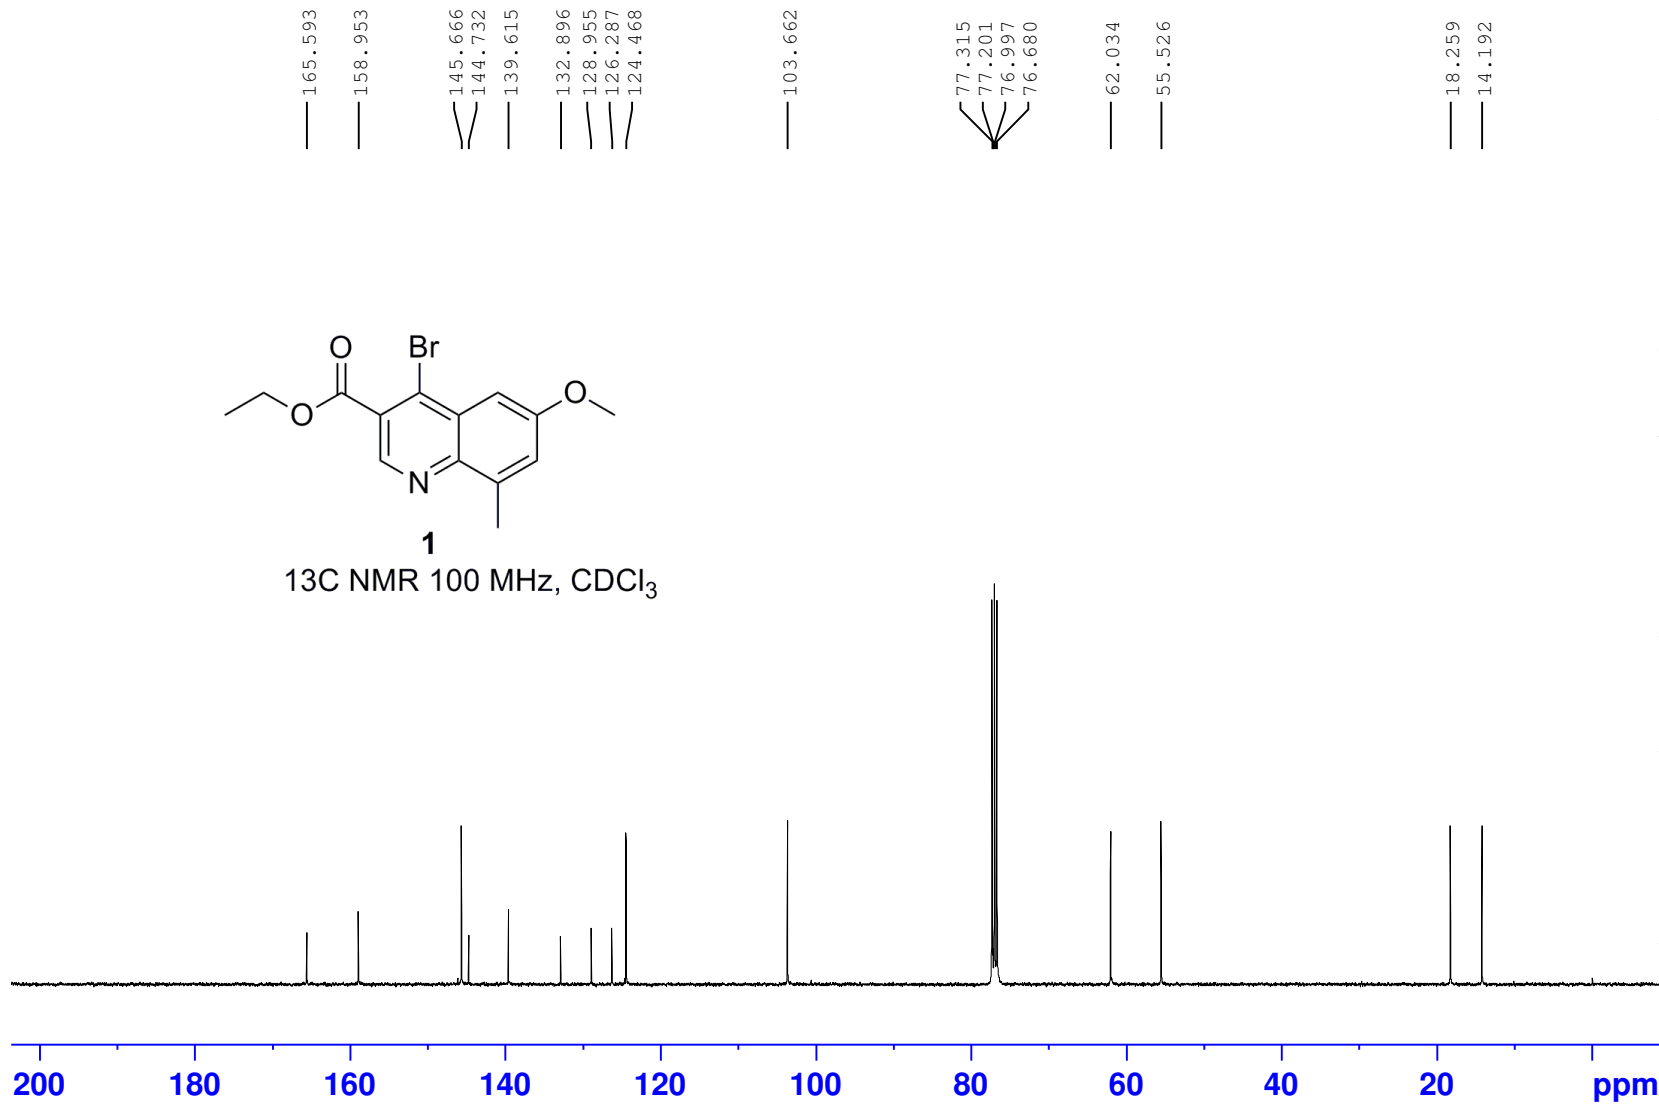

Current Data Parameters  
 NAME 511903C1078  
 EXPNO 2  
 PROCNO 1

F2 - Acquisition Parameters  
 Date\_ 20190326  
 Time 6.36  
 INSTRUM spect  
 PROBHD 5 mm PABBO BB/  
 PULPROG zgpg30  
 TD 65536  
 SOLVENT CDCl3  
 NS 1300  
 DS 4  
 SWH 24038.461 Hz  
 FIDRES 0.366798 Hz  
 AQ 1.3631488 sec  
 RG 195.29  
 DW 20.800 usec  
 DE 6.50 usec  
 TE 298.1 K  
 D1 3.00000000 sec  
 D11 0.03000000 sec  
 TD0 1

===== CHANNEL f1 =====  
 SFO1 100.6228293 MHz  
 NUC1 13C  
 P1 10.00 usec  
 PLW1 78.00000000 W

===== CHANNEL f2 =====  
 SFO2 400.1316005 MHz  
 NUC2 1H  
 PCPD2 waltz16  
 PCPD2 90.00 usec  
 PLW2 16.00000000 W  
 PLW12 0.18777999 W  
 PLW13 0.15210000 W

F2 - Processing parameters  
 SI 32768  
 SF 100.6127720 MHz  
 WDW EM  
 SSB 0  
 LB 2.00 Hz  
 GB 0  
 PC 1.40



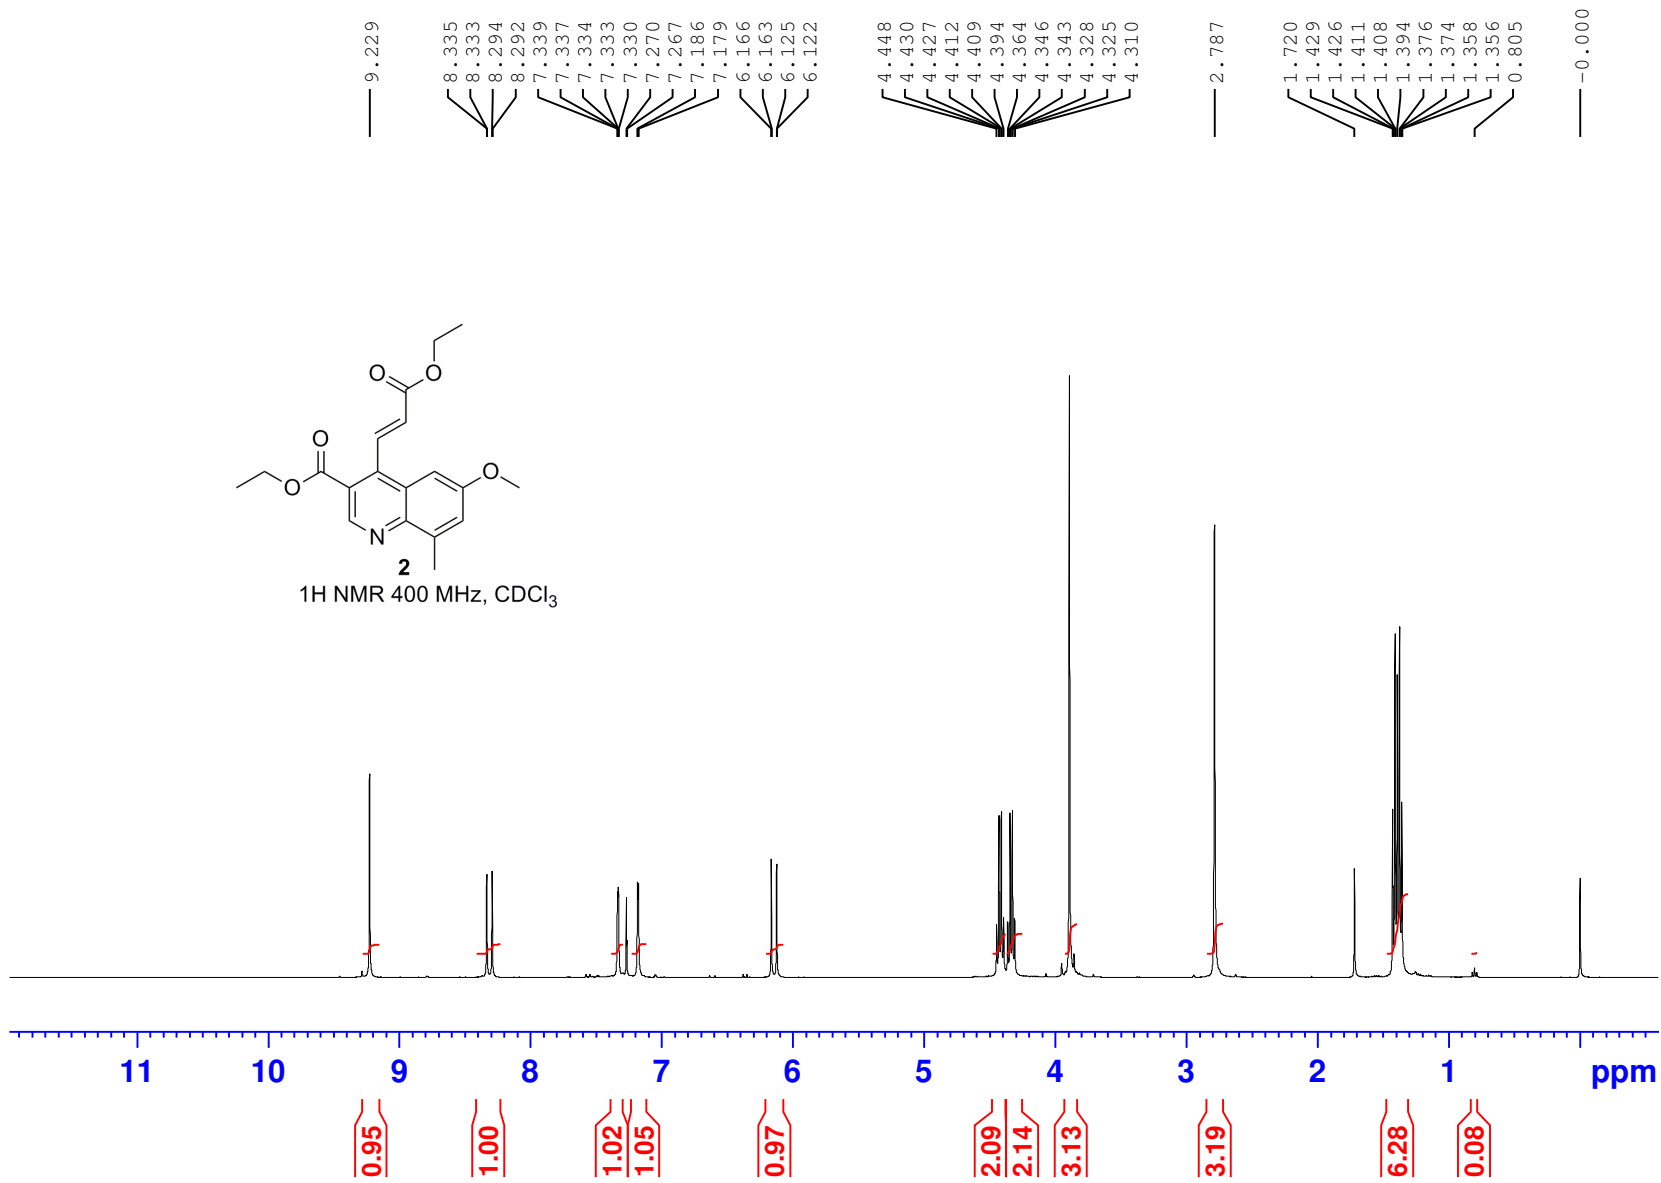

```

Current Data Parameters
NAME      511807C0987
EXPNO     1
PROCNO    1

F2 - Acquisition Parameters
Date_     20180723
Time      8.43
INSTRUM   spect
PROBHD    5 mm PABBO BB/
PULPROG   zg30
TD         65536
SOLVENT   CDC13
NS         8
DS         2
SWH        8012.820 Hz
FIDRES     0.122266 Hz
AQ         4.0894465 sec
RG         86.08
DW         62.400 usec
DE         6.50 usec
TE         0 K
D1         1.00000000 sec
TD0        1

===== CHANNEL f1 =====
SFO1      400.1324710 MHz
NUC1       1H
P1         9.75 usec
PLW1      16.00000000 W

F2 - Processing parameters
SI         65536
SF         400.1300058 MHz
WDW        EM
SSB        0
LB         0.30 Hz
GB         0
PC         1.00
    
```

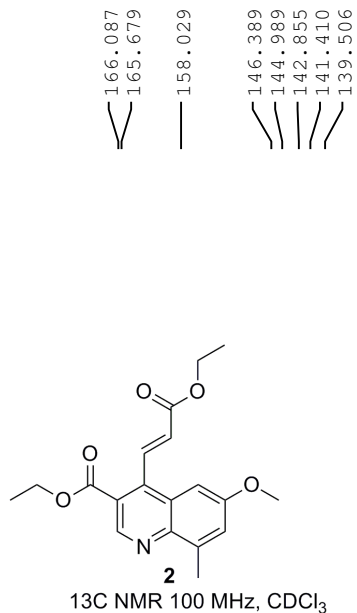

166.087  
 165.679  
 158.029  
 146.389  
 144.989  
 142.855  
 141.410  
 139.506  
 126.339  
 125.825  
 123.972  
 121.521  
 101.830  
 77.314  
 76.996  
 76.678  
 61.607  
 60.933  
 55.470  
 18.363  
 14.255  
 14.119

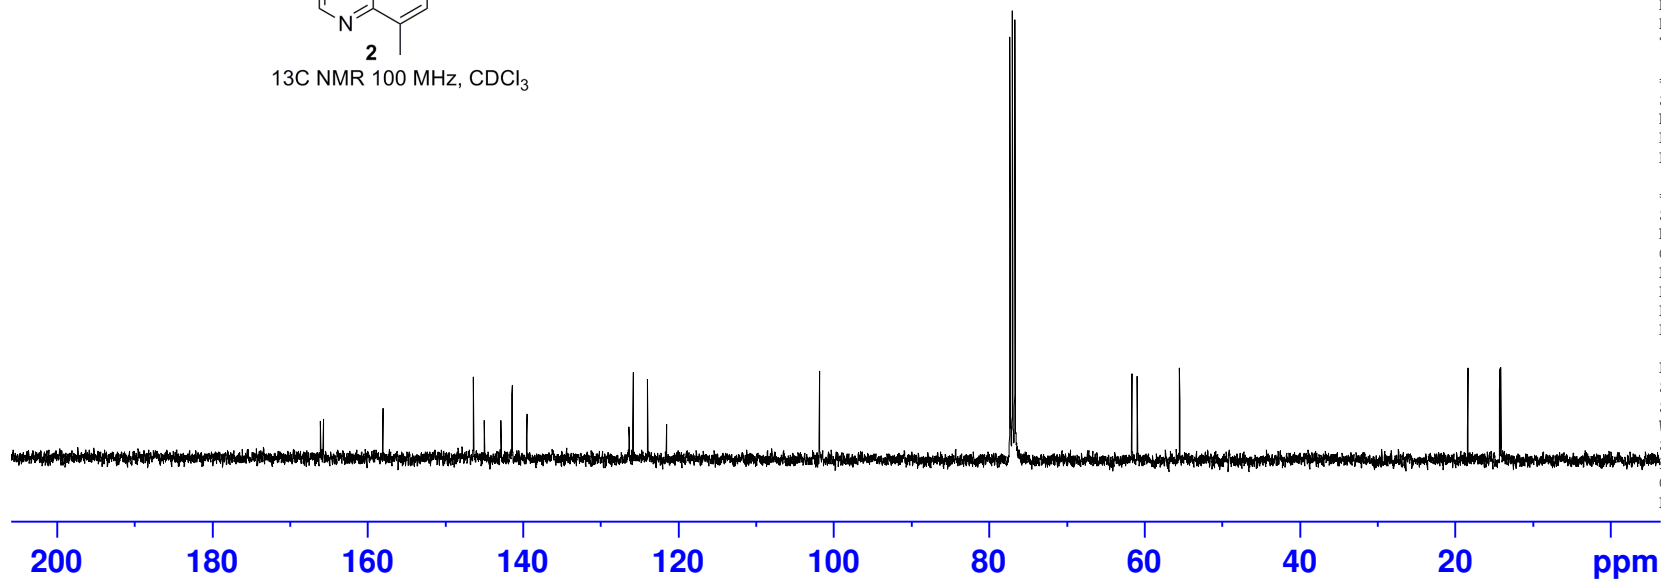

Current Data Parameters  
 NAME 511807C0987  
 EXPNO 2  
 PROCNO 1

F2 - Acquisition Parameters  
 Date\_ 20180723  
 Time 8.49  
 INSTRUM spect  
 PROBHD 5 mm PABBO BB/  
 PULPROG zgpg30  
 TD 65536  
 SOLVENT CDCl3  
 NS 128  
 DS 4  
 SWH 24038.461 Hz  
 FIDRES 0.366798 Hz  
 AQ 1.3631488 sec  
 RG 195.29  
 DW 20.800 usec  
 DE 6.50 usec  
 TE 0 K  
 D1 3.00000000 sec  
 D11 0.03000000 sec  
 TD0 1

===== CHANNEL f1 =====  
 SFO1 100.6228293 MHz  
 NUC1 13C  
 P1 10.00 usec  
 PLW1 78.00000000 W

===== CHANNEL f2 =====  
 SFO2 400.1316005 MHz  
 NUC2 1H  
 CPDPRG[2] waltz16  
 PCPD2 90.00 usec  
 PLW2 16.00000000 W  
 PLW12 0.18777999 W  
 PLW13 0.15210000 W

F2 - Processing parameters  
 SI 32768  
 SF 100.6127727 MHz  
 WDW EM  
 SSB 0  
 LB 2.00 Hz  
 GB 0  
 PC 1.40

TP-MA-01-05  
AR NO-NMR/18/07/1603

f27bb3c1002

Reference Code: 511807B3504-TP-MA-01-05  
Solvent: cdcl3  
Archive directory:  
/home/gvkbio/data/2018/Jul  
Agilent 400-MRDD2  
Data collected on: Jul 16 2018  
Experiment: PROTON

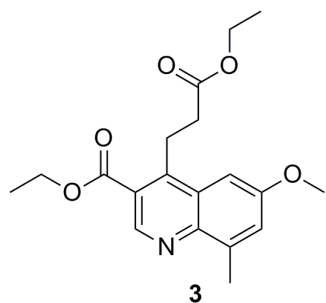

<sup>1</sup>H NMR 400 MHz, CDCl<sub>3</sub>

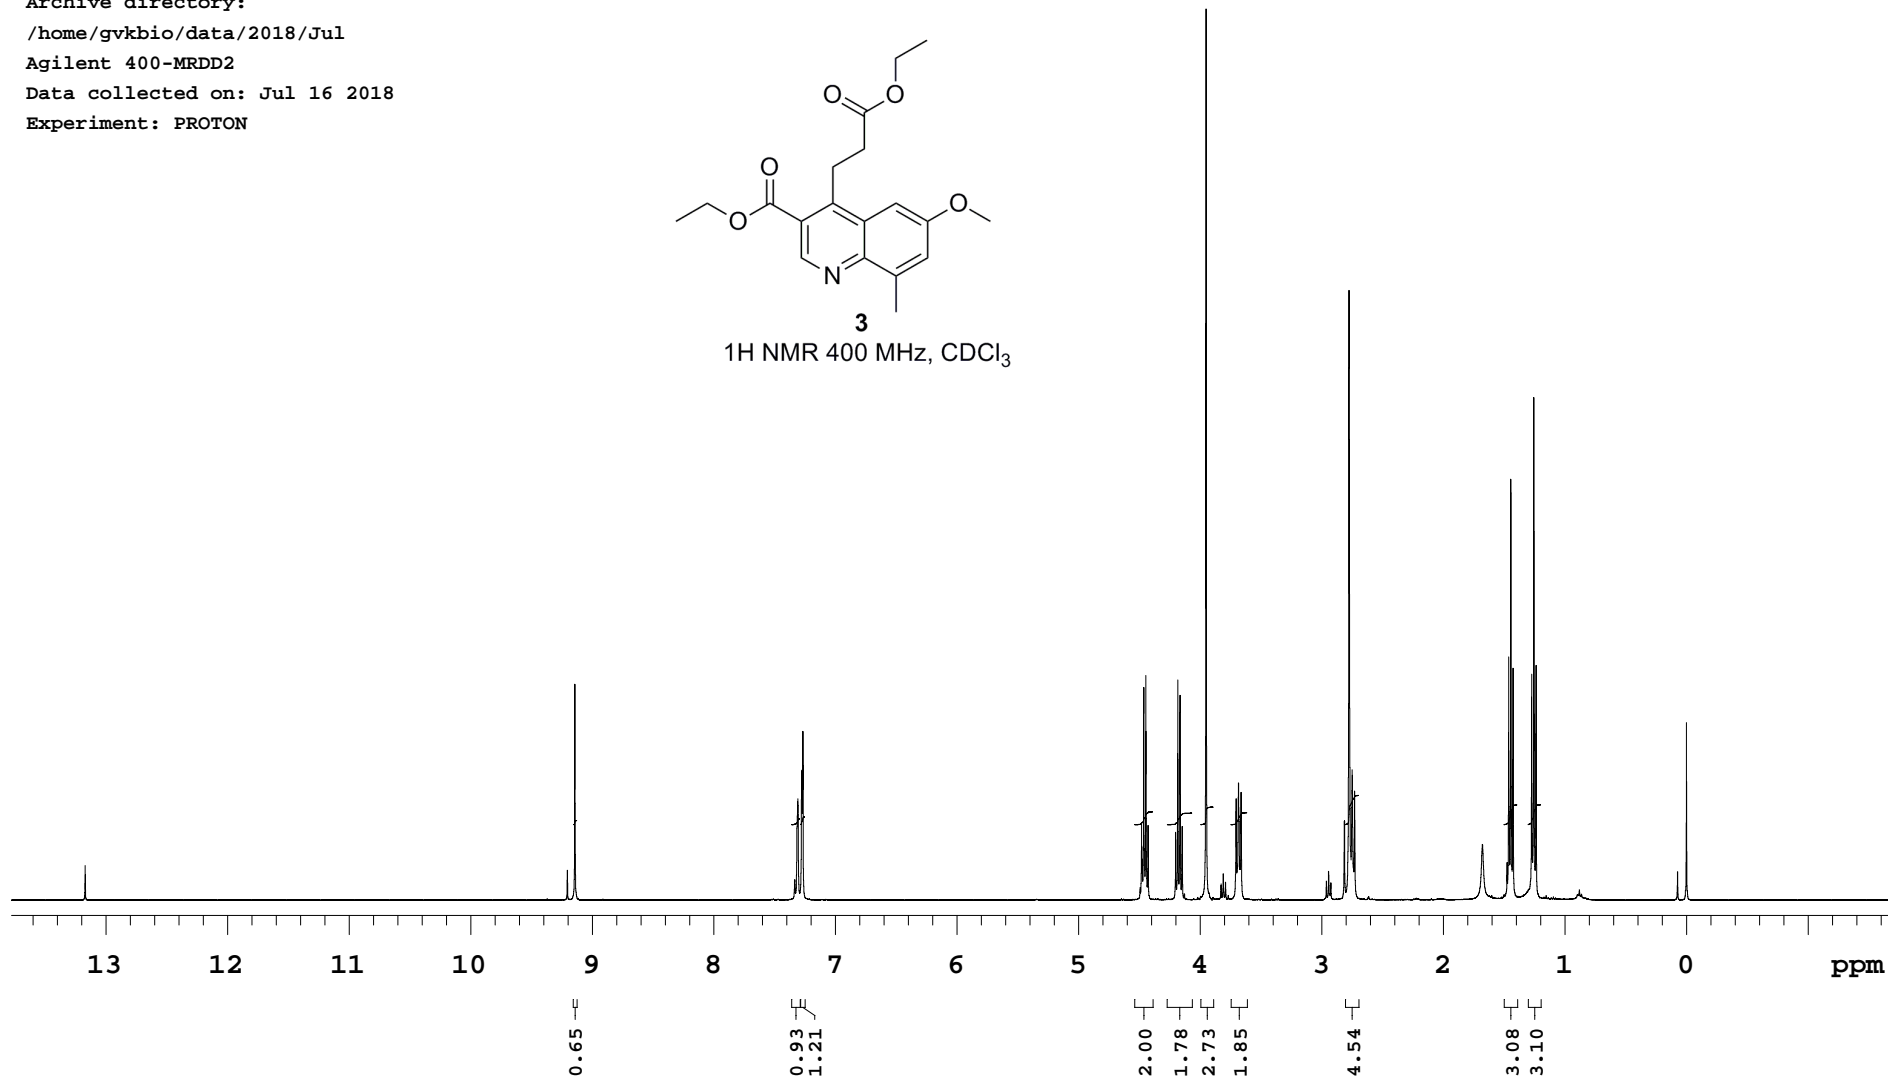

TP-MA-01-05  
AR NO-NMR/18/07/1603

f27bb3c1002

Reference Code: 511807B3504-TP-MA-01-05  
Solvent: cdcl3  
Archive directory:  
/home/gvkbio/data/2018/Jul  
Agilent 400-MRDD2  
Data collected on: Jul 16 2018  
Experiment: PROTON

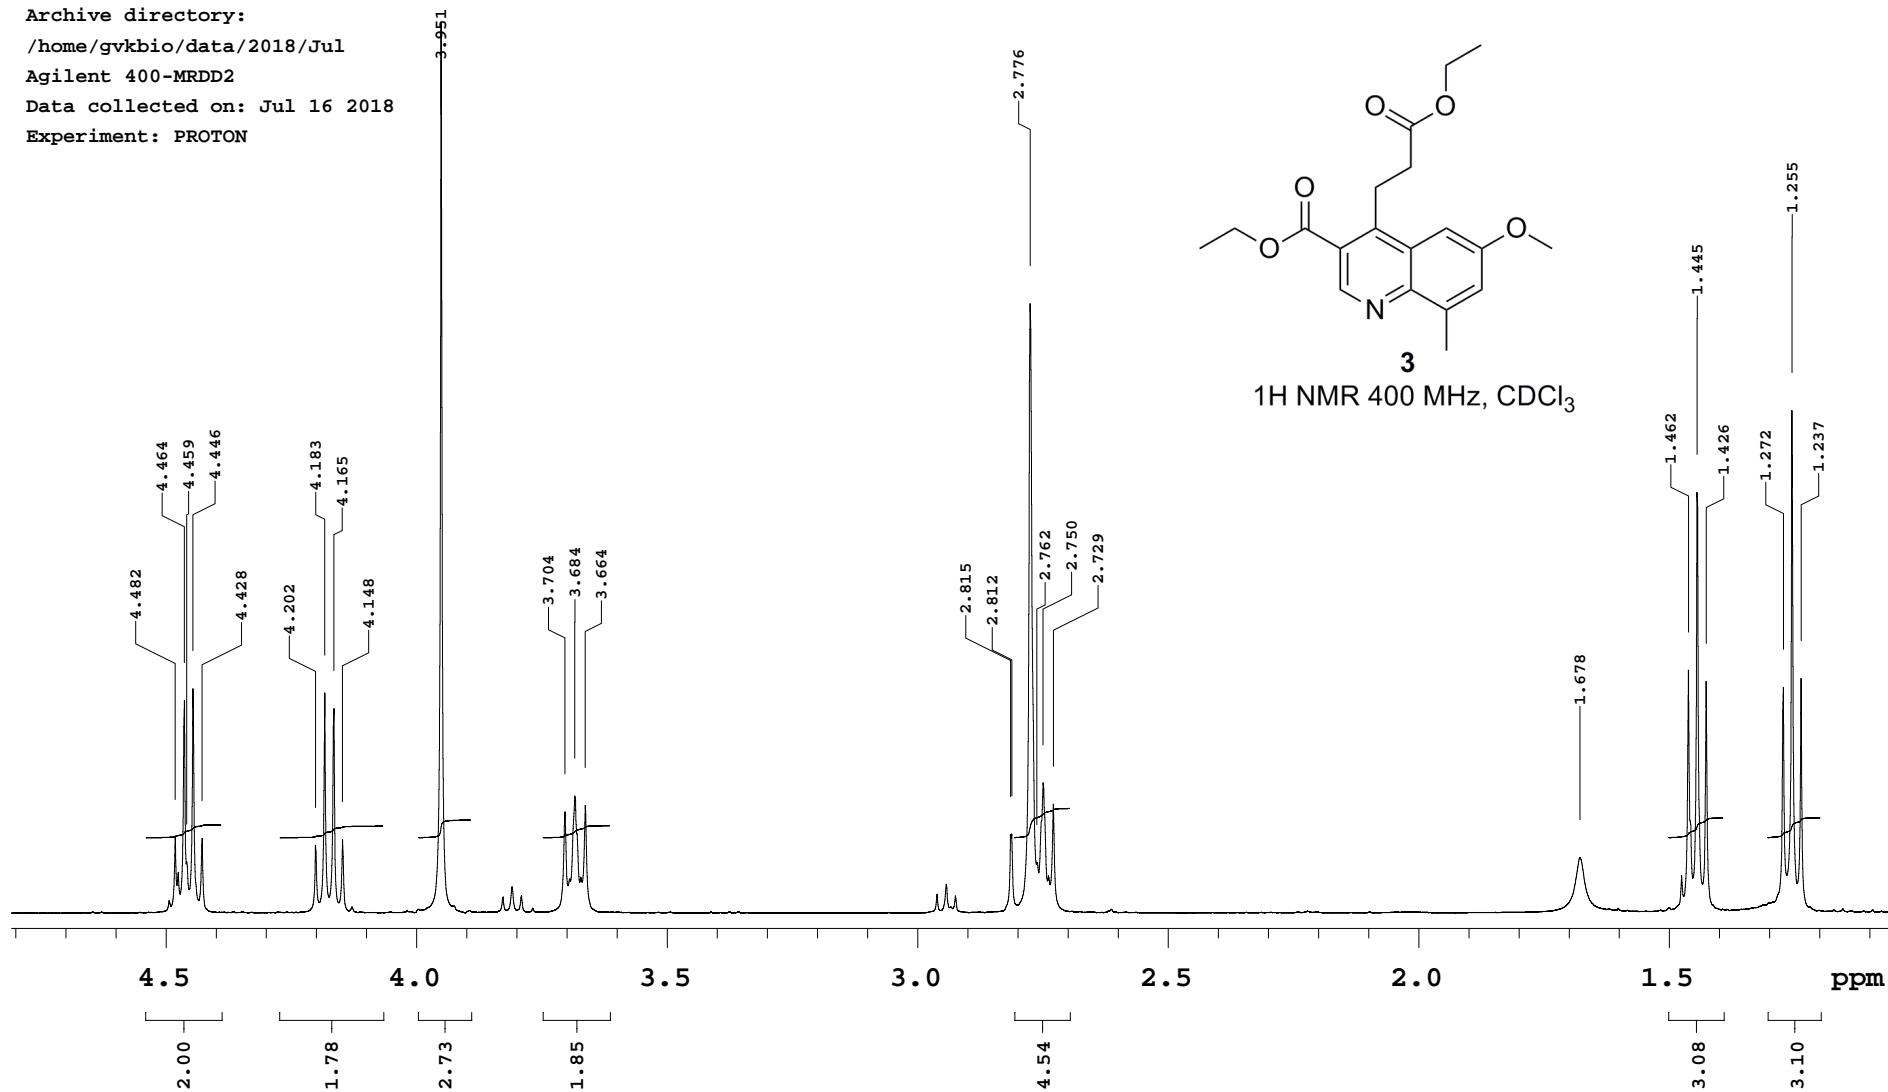

TP-MA-01-05  
AR NO-NMR/18/07/1603

5f823017001

Reference Code: 511807B3504-TP-MA-01-05  
Solvent: cdcl3  
Archive directory:  
/home/gvkbio/data/2018/Jul  
Agilent 400-MRDD2  
Data collected on: Jul 16 2018  
Experiment: CARBON

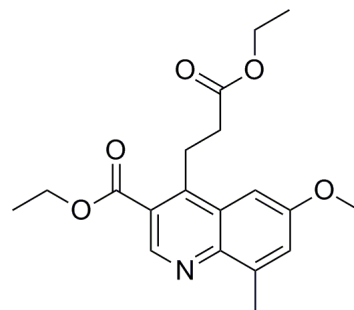

3  
13C NMR 100 MHz, CDCl<sub>3</sub>

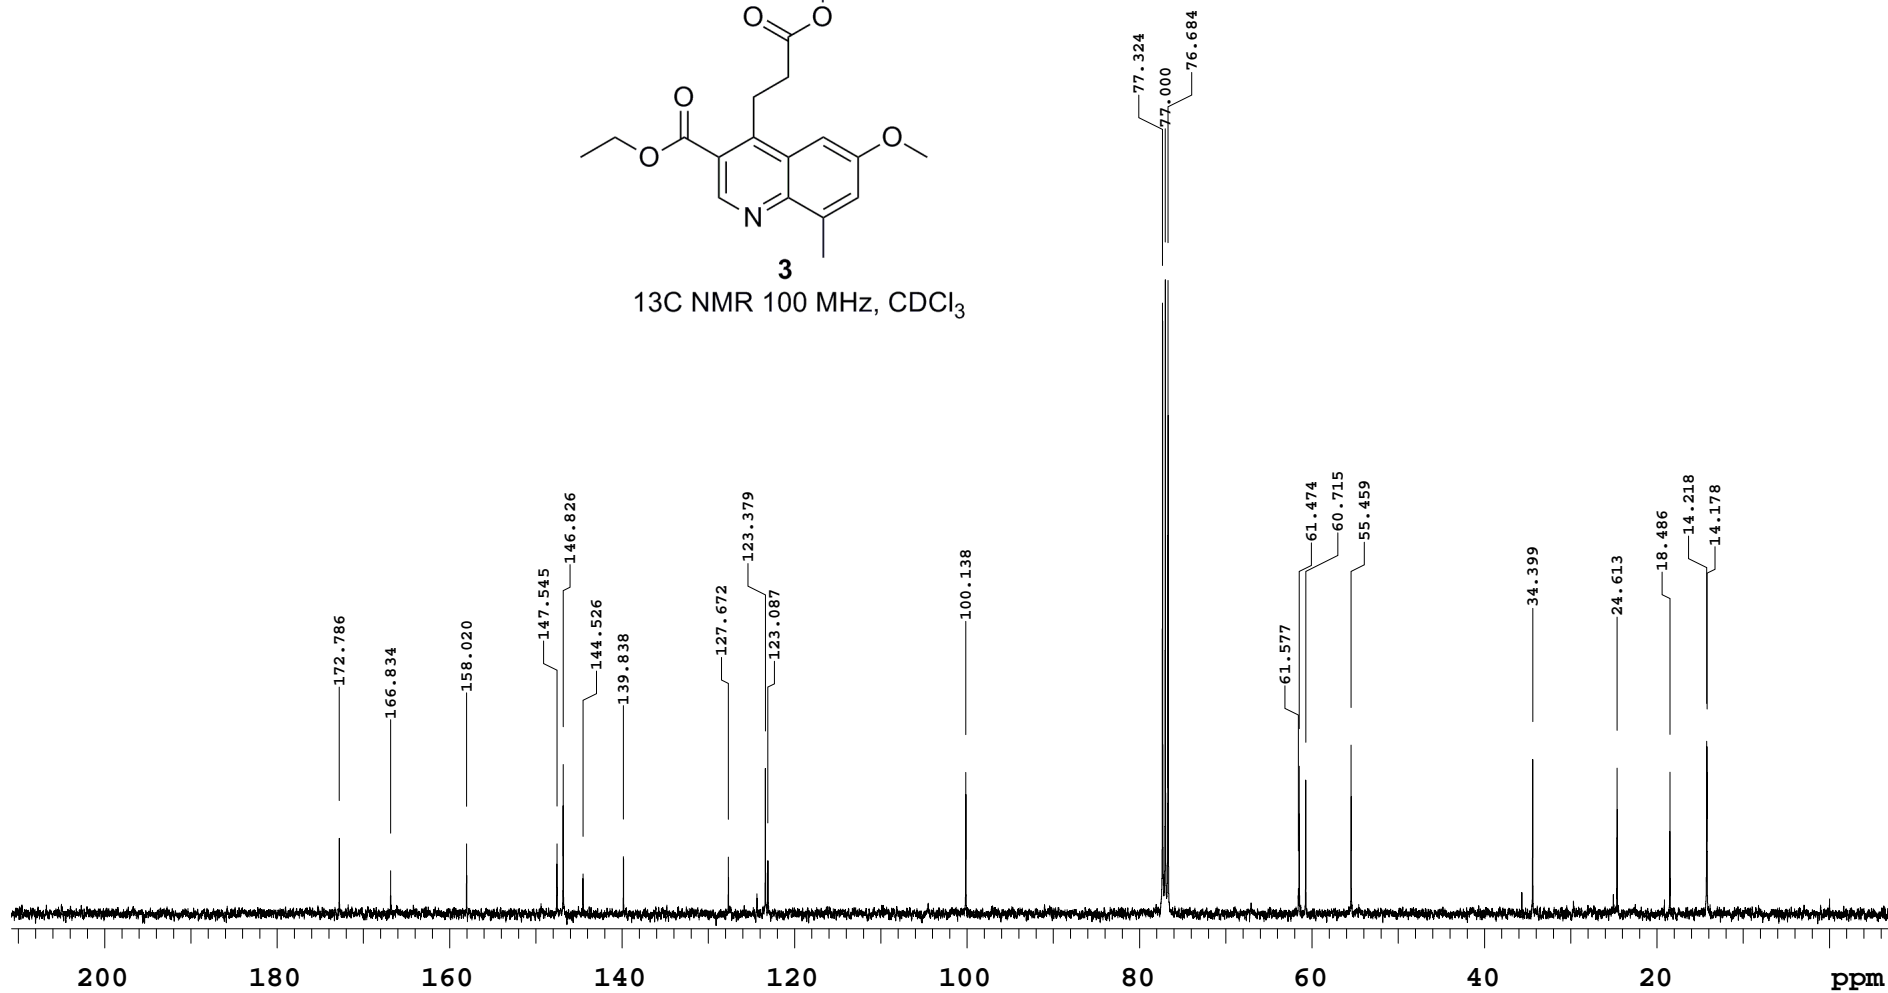

TP-MA-01-06  
AR NO-NMR/18/07/1604

21b3baaf002

Reference Code: 511807B3505-TP-MA-01-06  
Solvent: cdcl3  
Archive directory:  
/home/gvkbio/data/2018/Jul  
Agilent 400-MRDD2  
Data collected on: Jul 17 2018  
Experiment: PROTON

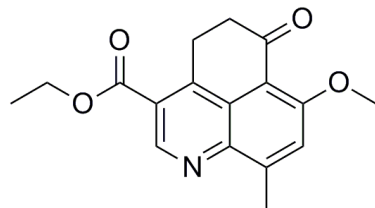

4

<sup>1</sup>H NMR 400 MHz, CDCl<sub>3</sub>

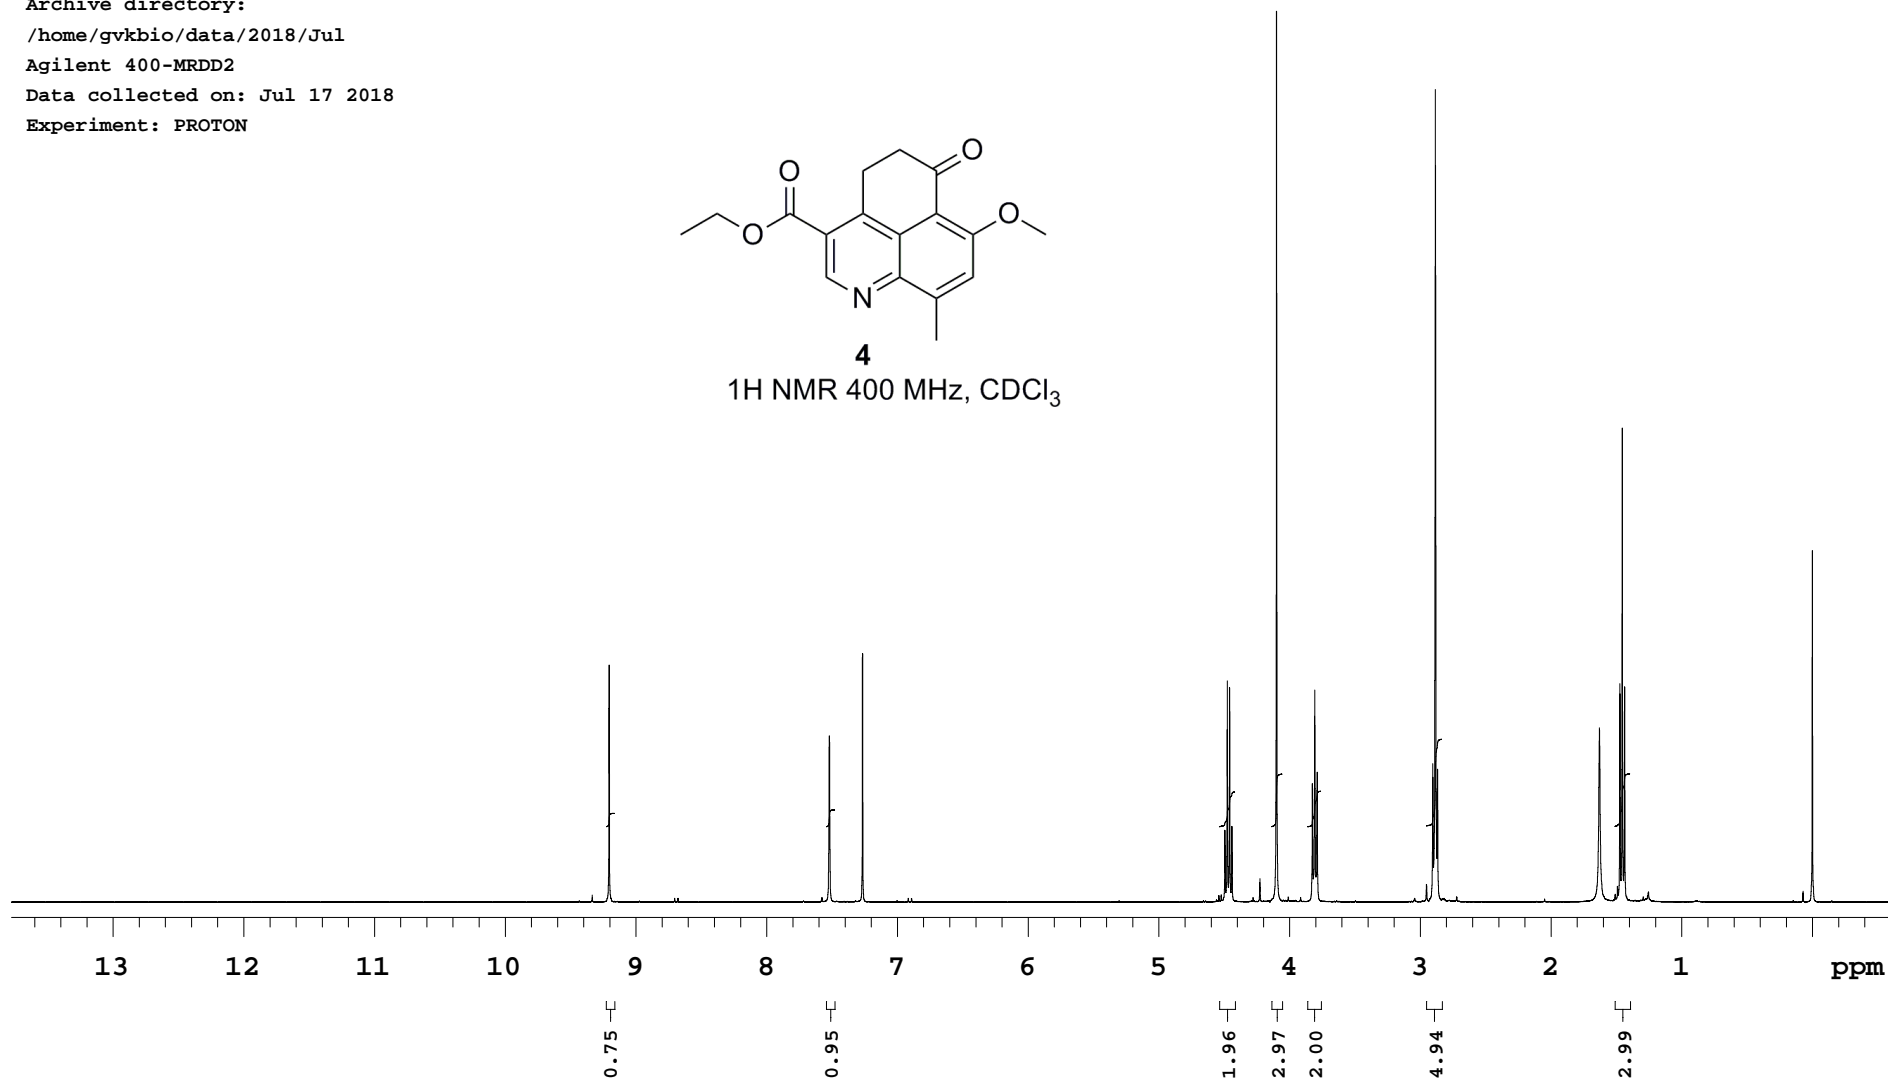

TP-MA-01-06  
AR NO-NMR/18/07/1604

21b3baaf002

Reference Code: 511807B3505-TP-MA-01-06  
Solvent: cdcl3  
Archive directory:  
/home/gvkbio/data/2018/Jul  
Agilent 400-MRDD2  
Data collected on: Jul 17 2018  
Experiment: PROTON

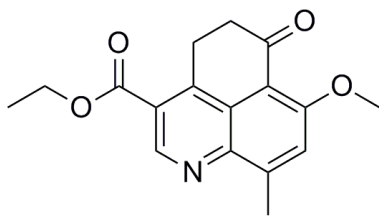

<sup>1</sup>H NMR 400 MHz, CDCl<sub>3</sub>

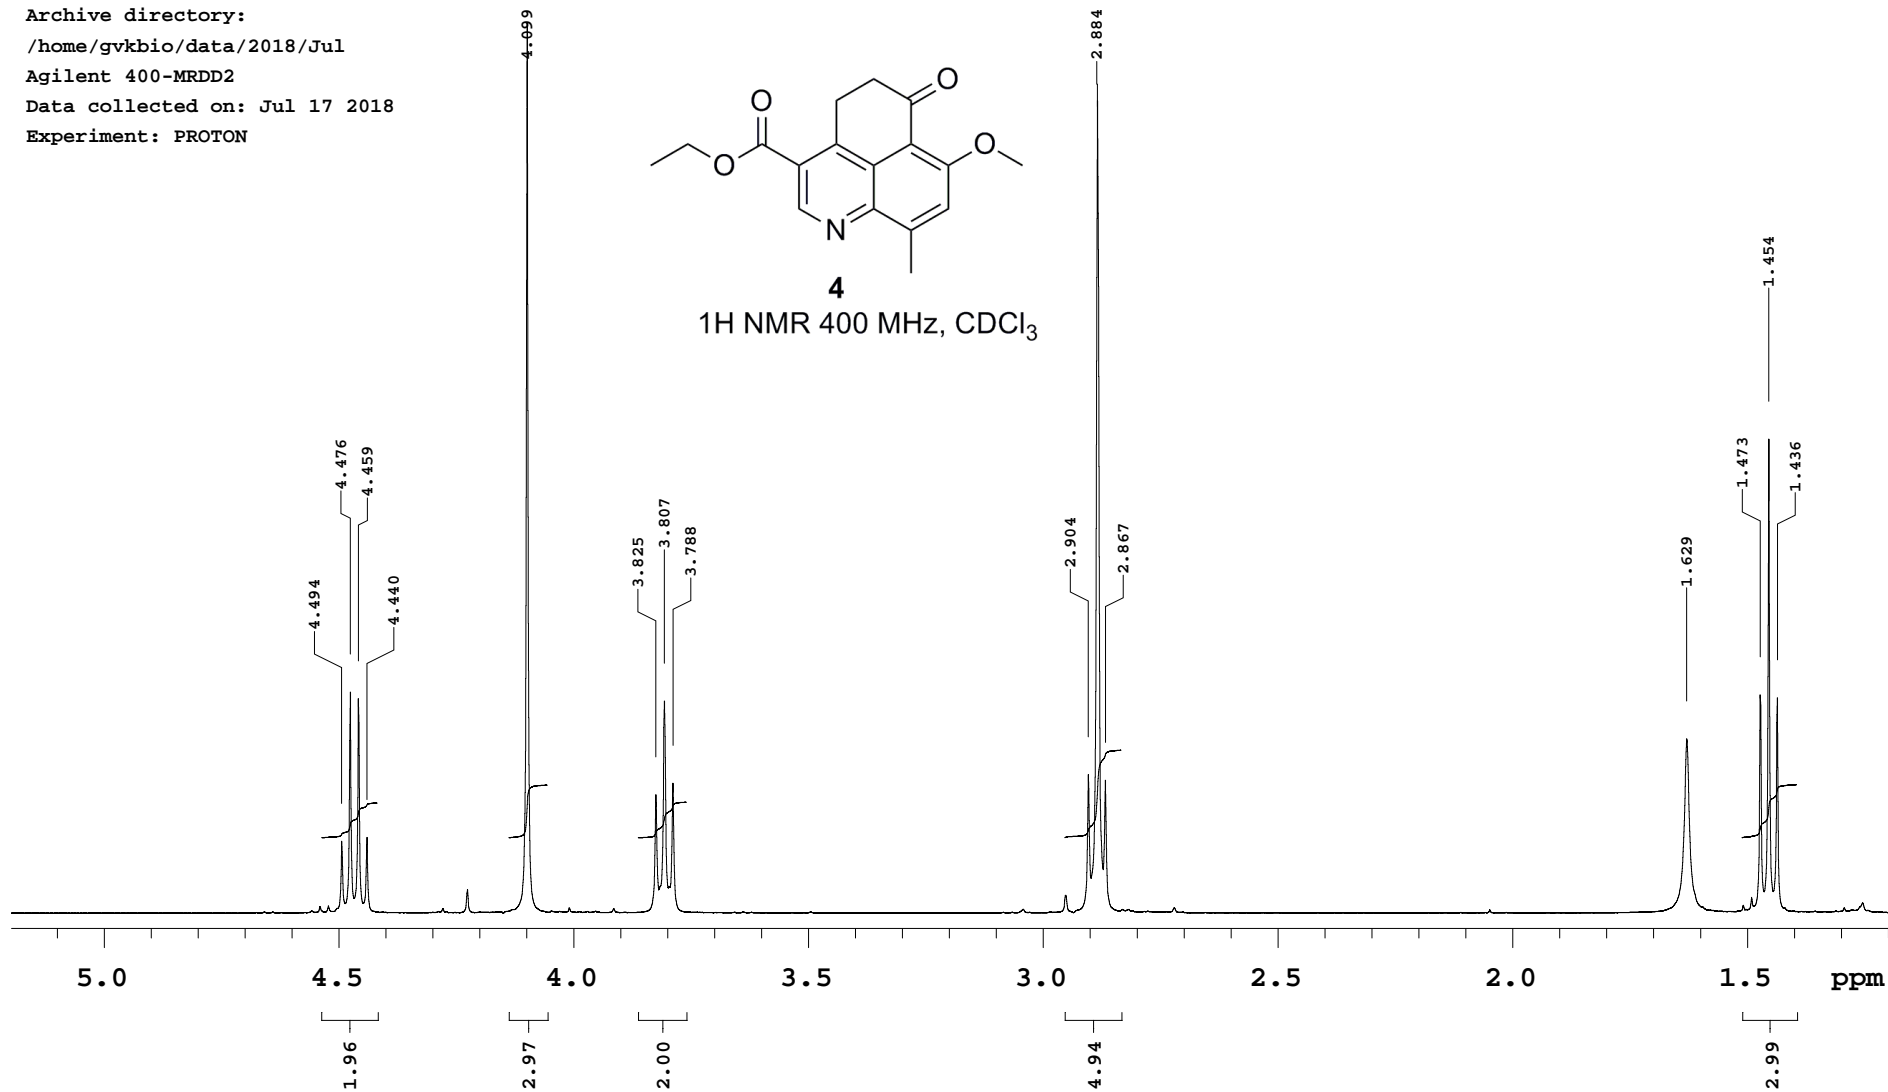

TP-MA-01-06  
AR NO-NMR/18/07/1604

7757a9ab001

Reference Code: 511807B3505-TP-MA-01-06  
Solvent: cdcl3  
Archive directory:  
/home/gvkbio/data/2018/Jul  
Agilent 400-MRDD2  
Data collected on: Jul 17 2018  
Experiment: CARBON

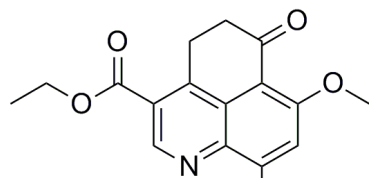

4

$^{13}\text{C}$  NMR 100 MHz,  $\text{CDCl}_3$

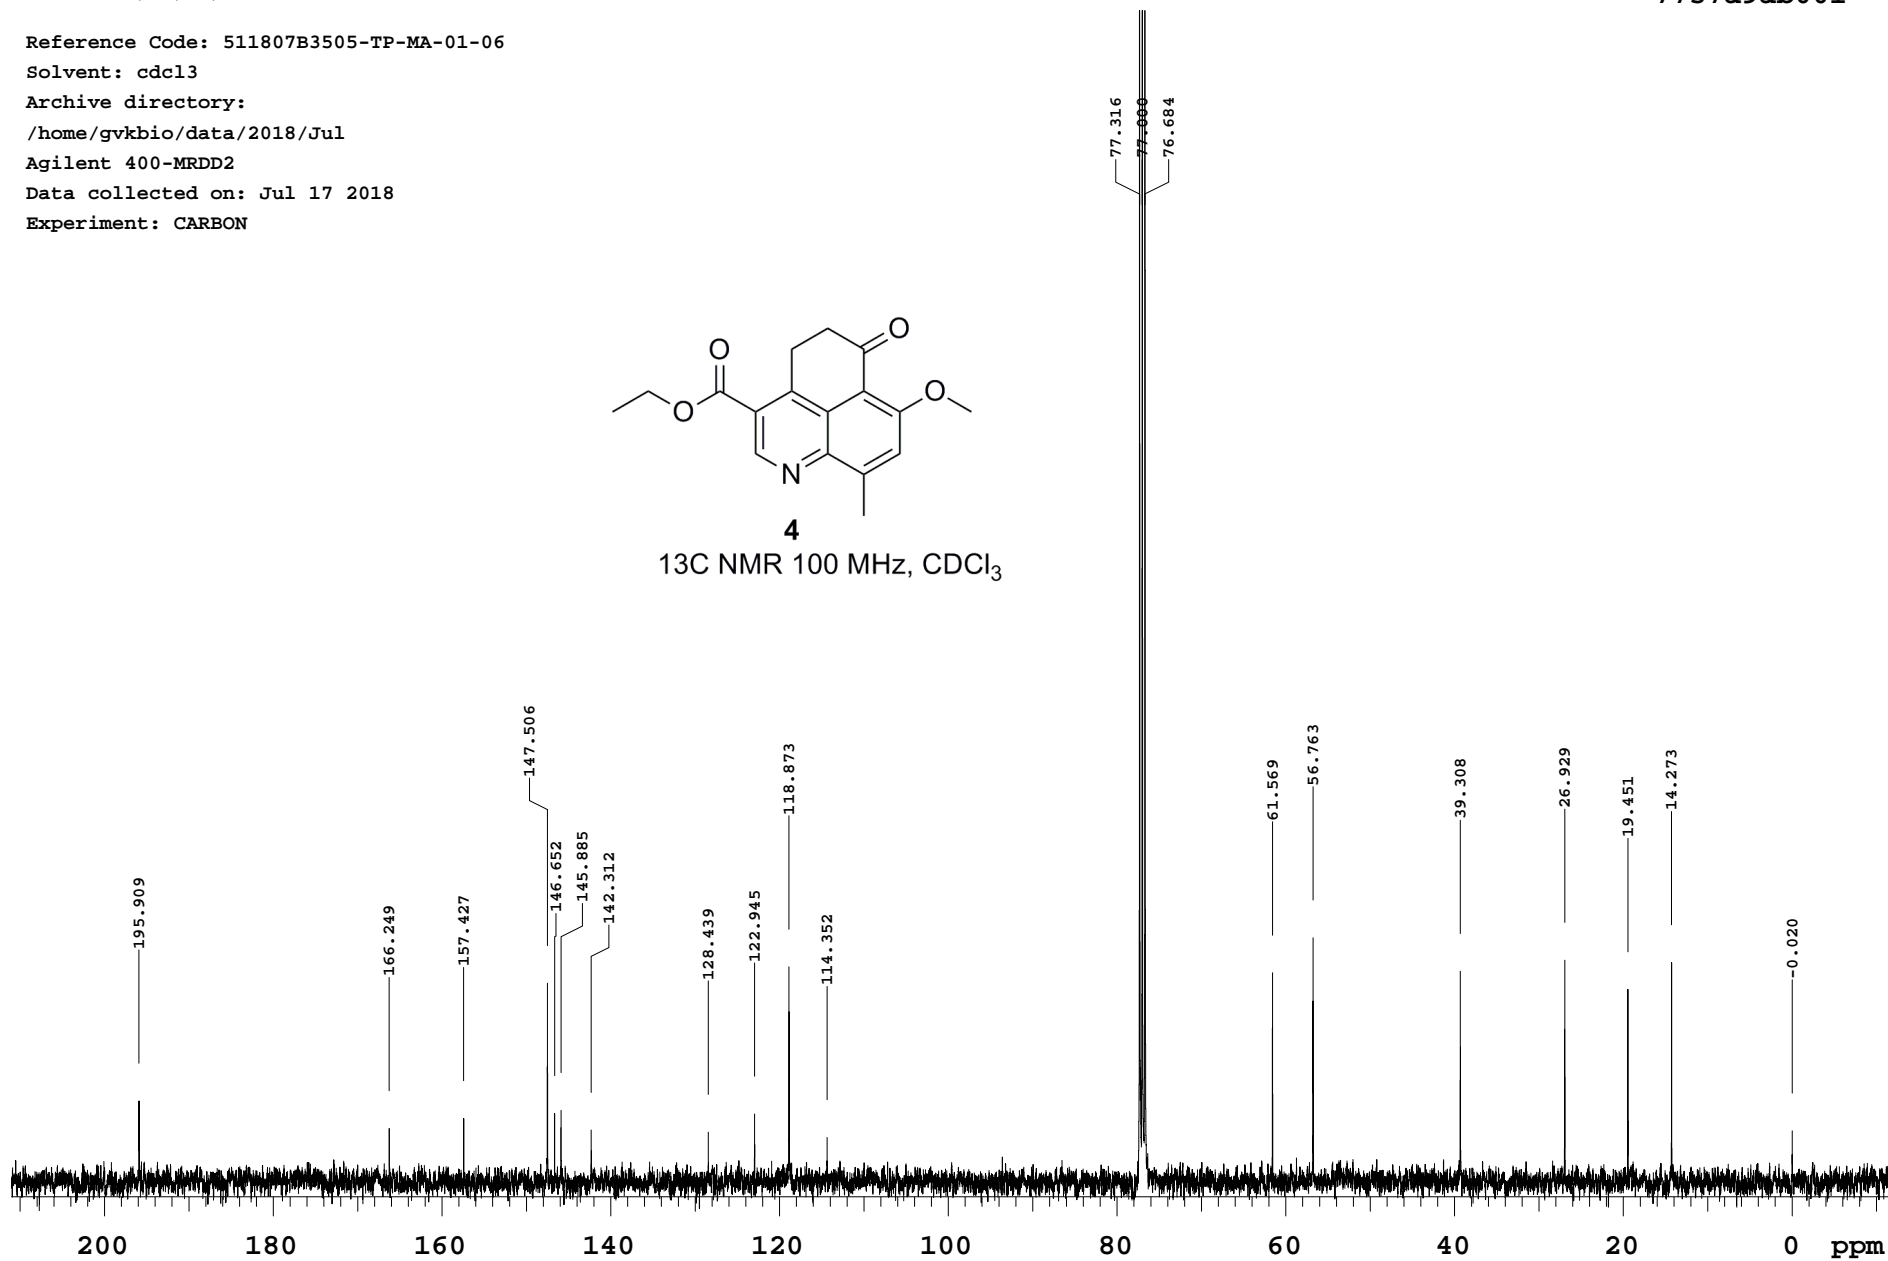



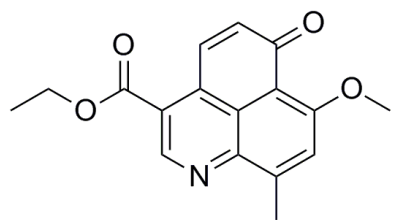

**5**

1H NMR 400 MHz, CDCl<sub>3</sub>

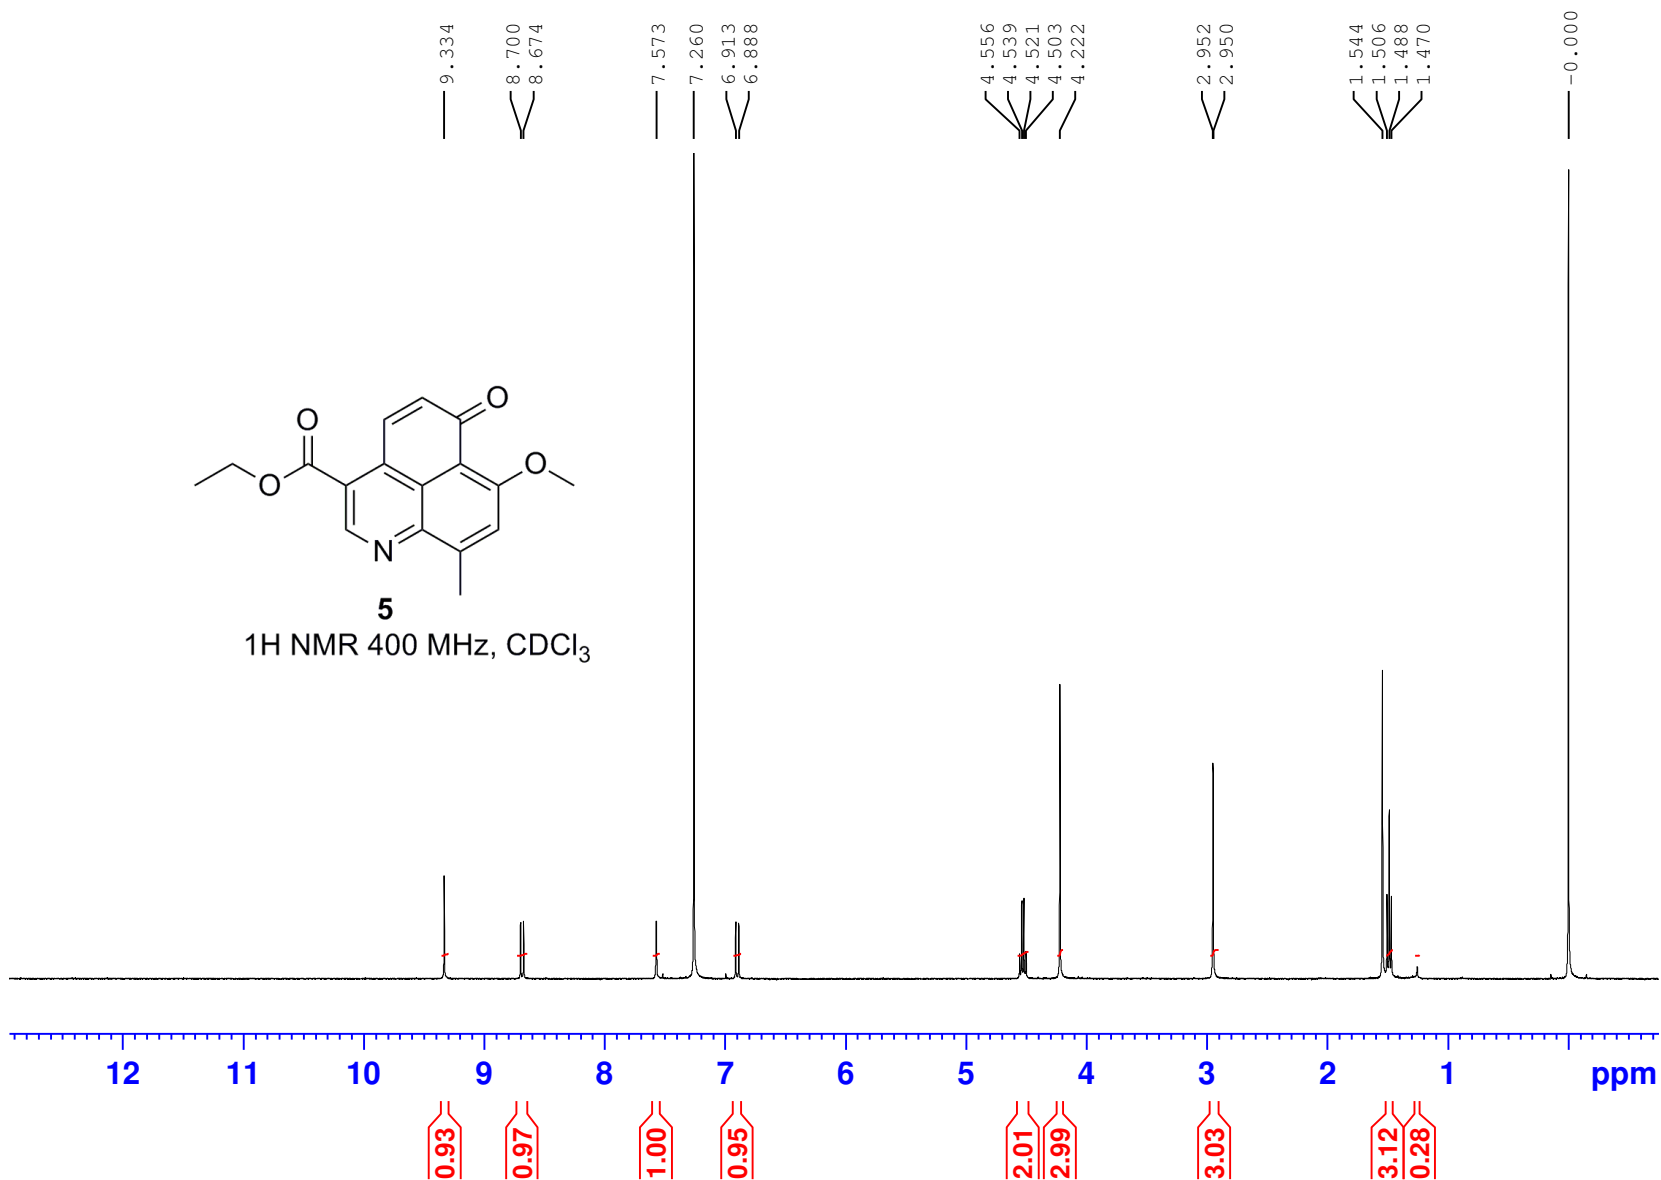

Current Data Parameters  
 NAME 511904A1560  
 EXPNO 1  
 PROCNO 1

F2 - Acquisition Parameters  
 Date\_ 20190402  
 Time 15.00  
 INSTRUM spect  
 PROBHD 5 mm PABBO BB/  
 PULPROG zg30  
 TD 65536  
 SOLVENT CDCl3  
 NS 8  
 DS 2  
 SWH 8012.820 Hz  
 FIDRES 0.122266 Hz  
 AQ 4.0894465 sec  
 RG 195.29  
 DW 62.400 usec  
 DE 6.50 usec  
 TE 299.5 K  
 D1 1.00000000 sec  
 TD0 1

===== CHANNEL f1 =====  
 SFO1 400.1324710 MHz  
 NUC1 1H  
 P1 9.75 usec  
 PLW1 16.00000000 W

F2 - Processing parameters  
 SI 65536  
 SF 400.1300096 MHz  
 WDW EM  
 SSB 0  
 LB 0.30 Hz  
 GB 0  
 PC 1.00

—182.72  
—165.82  
—163.48  
—149.32  
—147.31  
—142.44  
—135.66  
—134.20  
—133.59  
—124.29  
—123.14  
—118.60  
—113.30

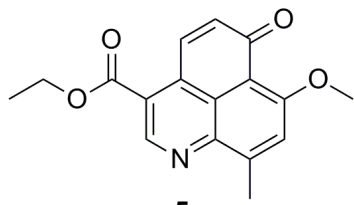

5

$^{13}\text{C}$  NMR 100 MHz,  $\text{CDCl}_3$

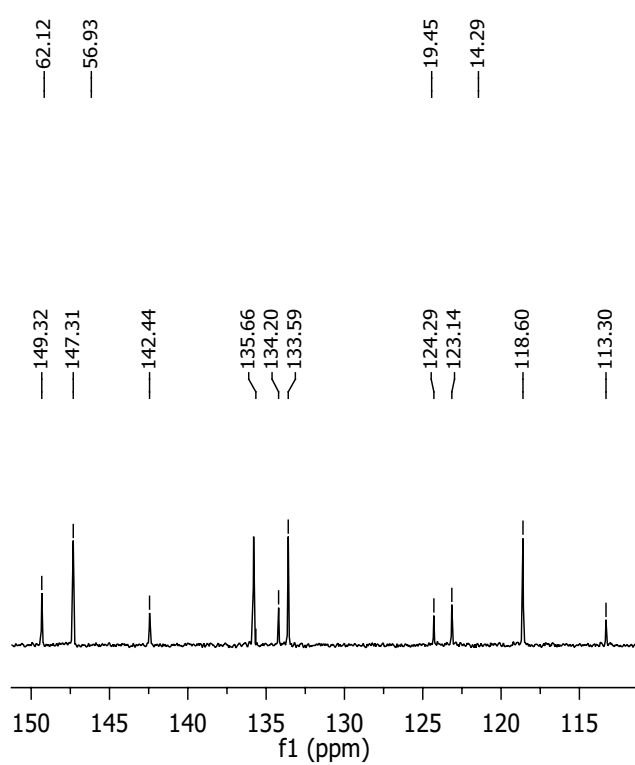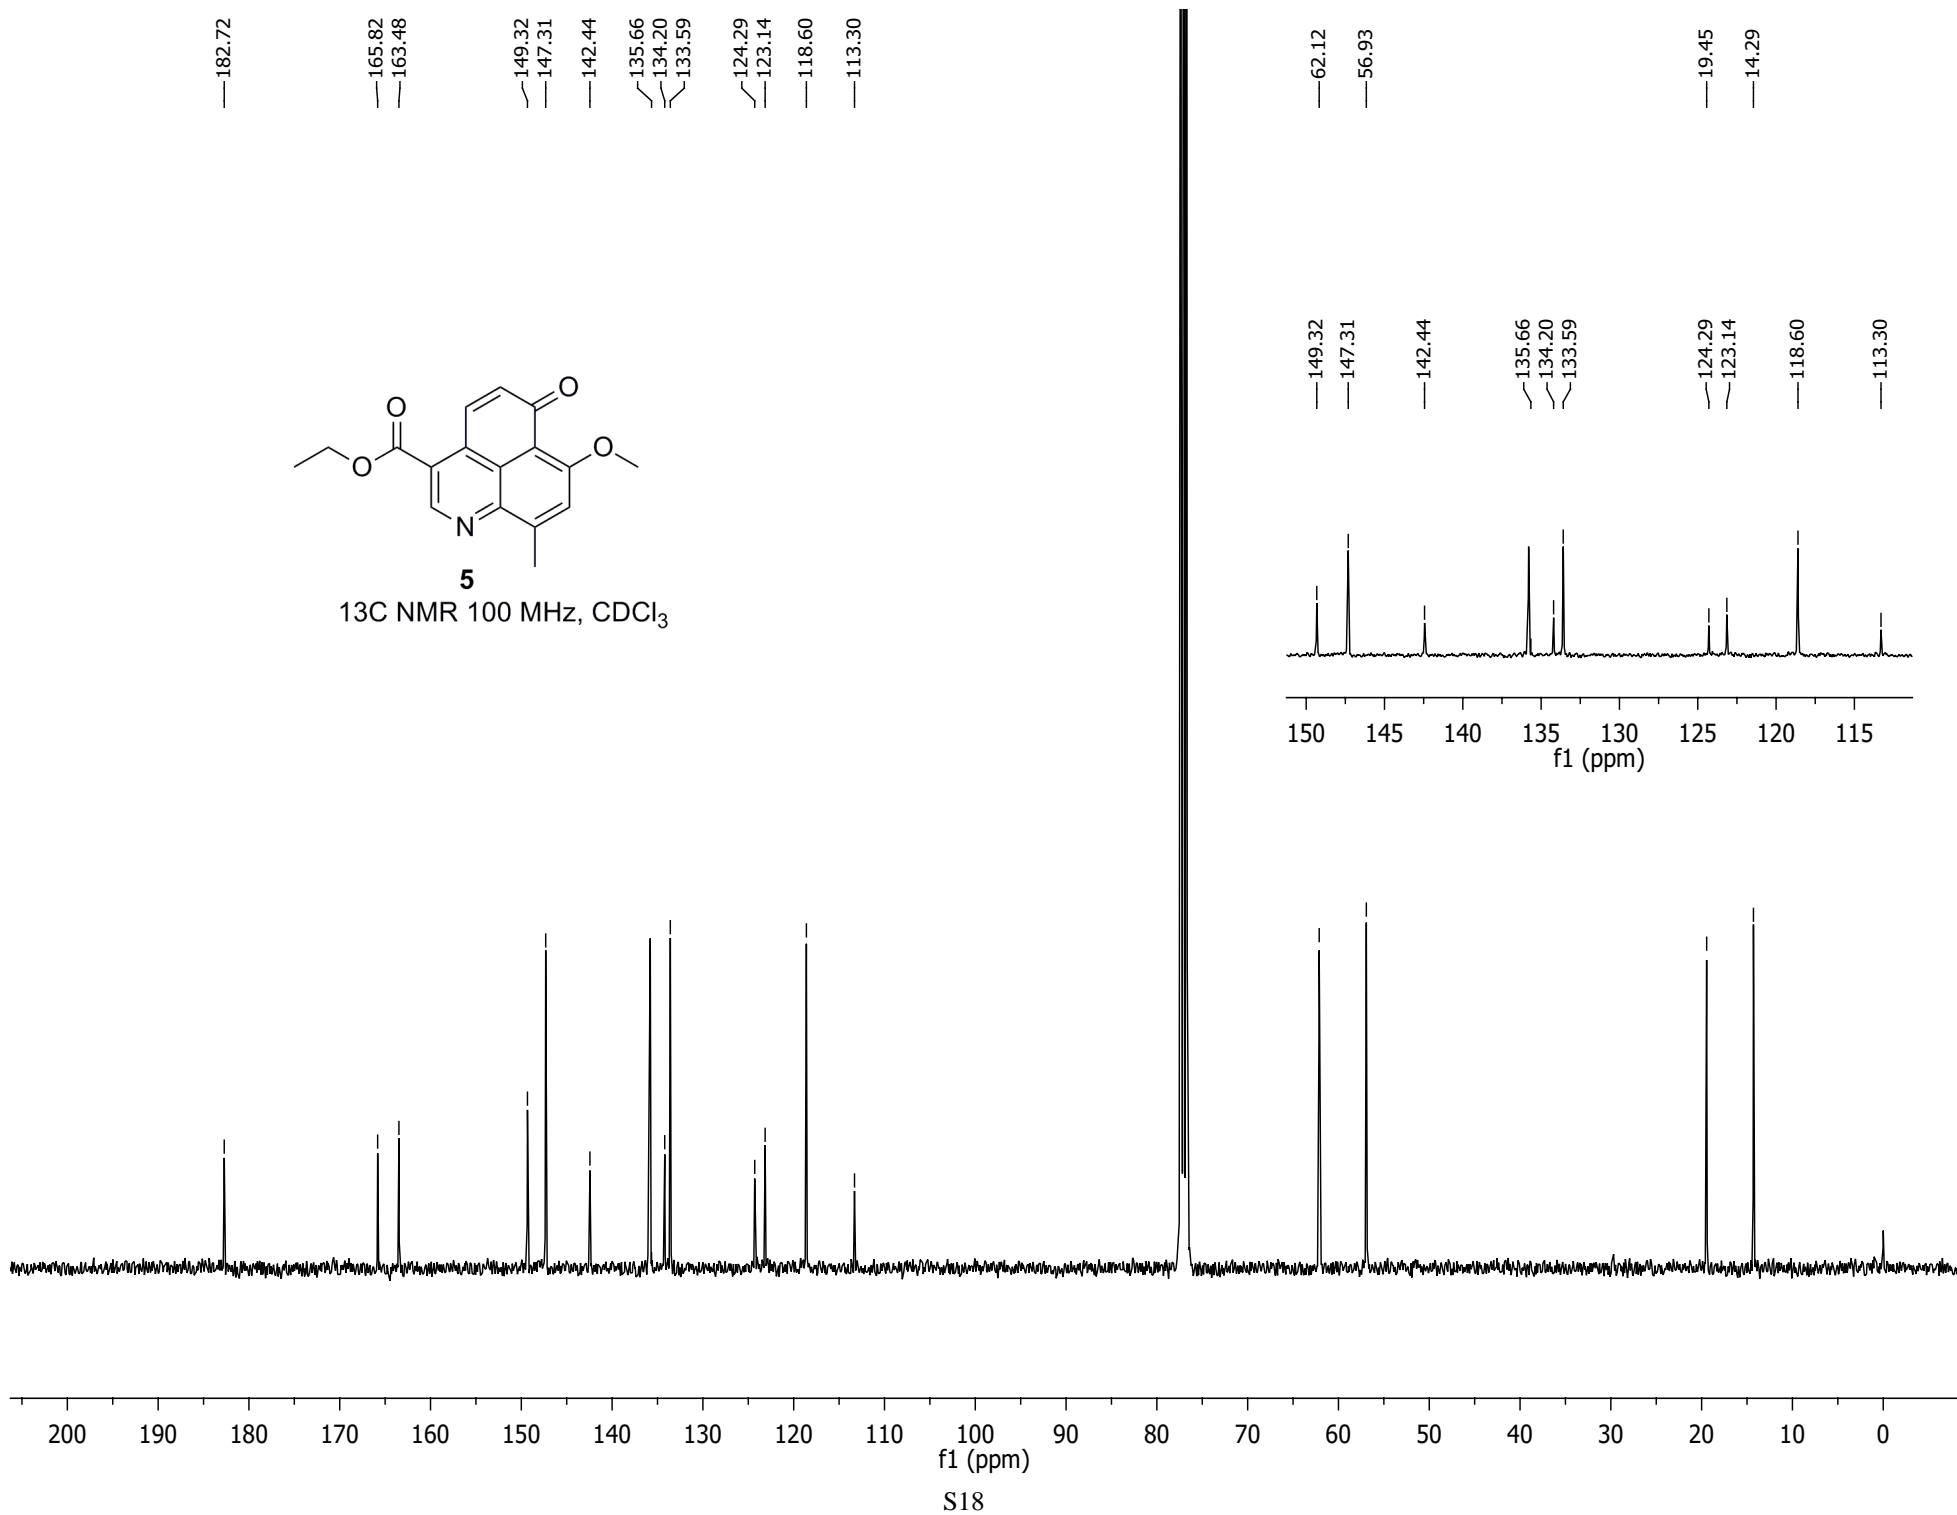

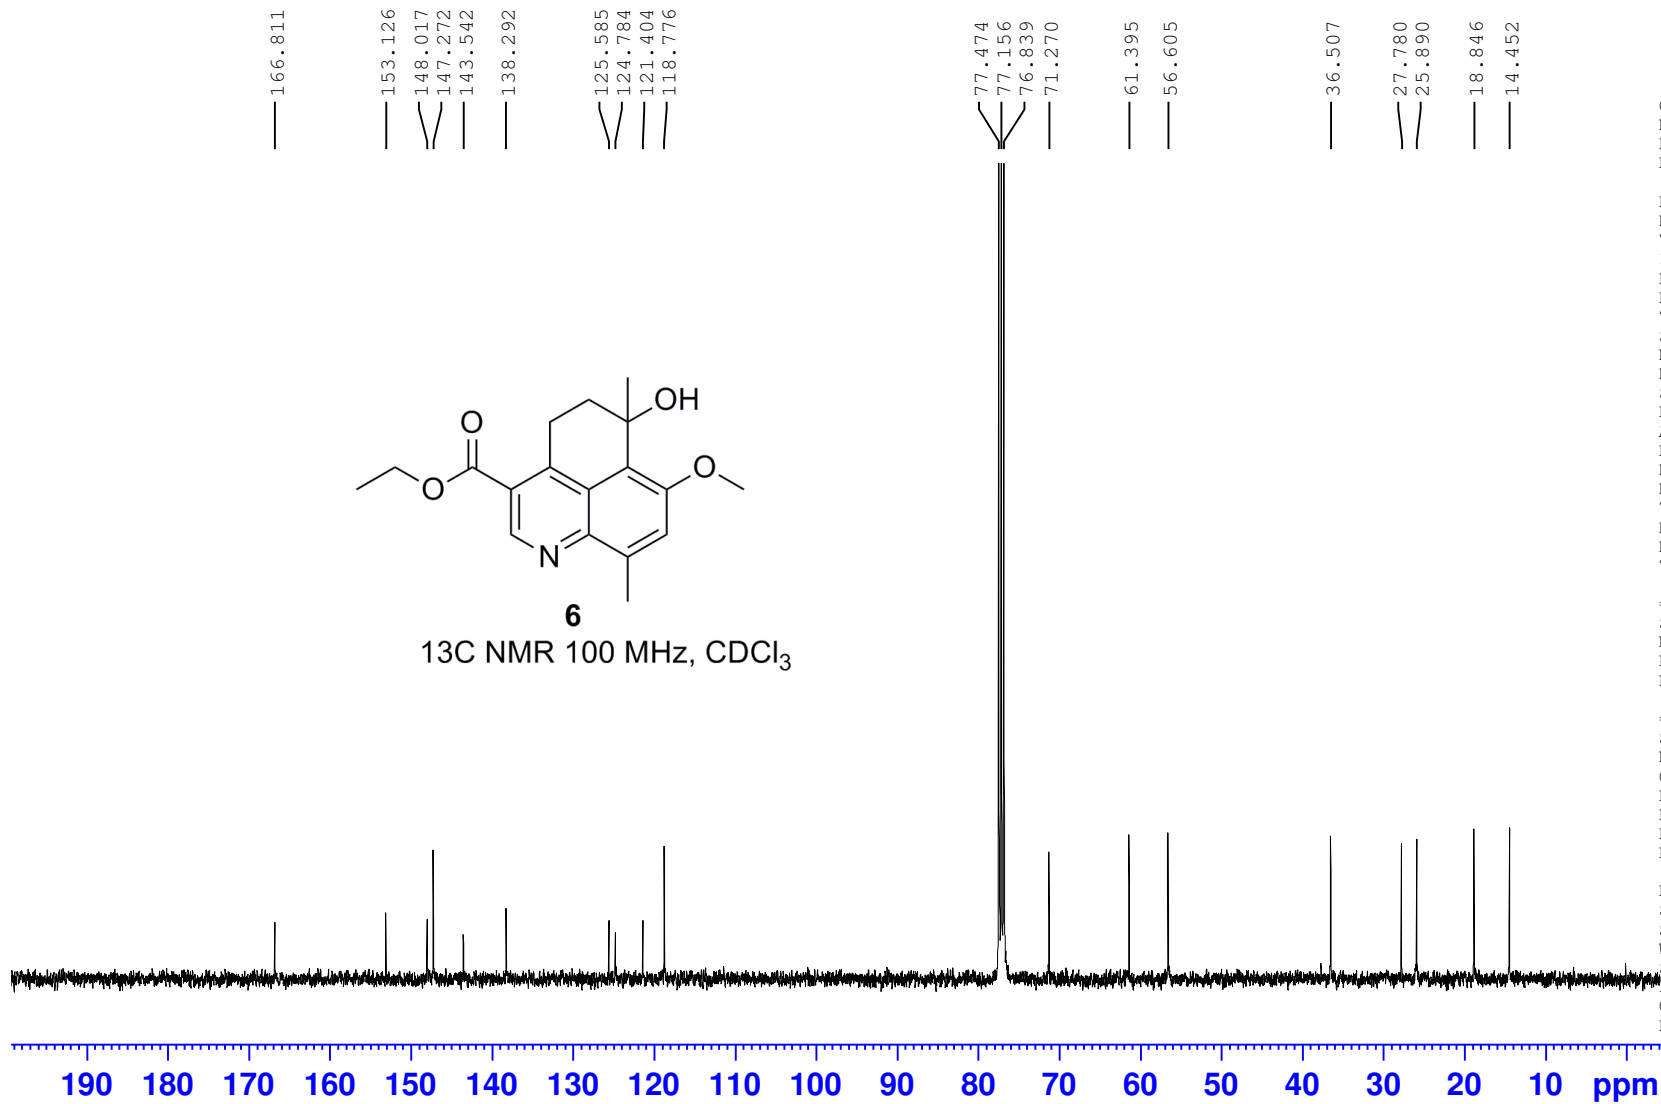

```

Current Data Parameters
NAME          511809A0037
EXPNO         2
PROCNO        1

F2 - Acquisition Parameters
Date_         20180903
Time          7.50
INSTRUM       spect
PROBHD        5 mm PABBO BB/
PULPROG       zgpg30
TD            65536
SOLVENT       CDCl3
NS            322
DS            4
SWH           24038.461 Hz
FIDRES        0.366798 Hz
AQ            1.3631488 sec
RG            195.29
DW            20.800 usec
DE            6.50 usec
TE            298.2 K
D1            3.00000000 sec
D11           0.03000000 sec
TD0           1

===== CHANNEL f1 =====
SFO1          100.6228293 MHz
NUC1           13C
P1            10.00 usec
PLW1          78.00000000 W

===== CHANNEL f2 =====
SFO2          400.1316005 MHz
NUC2           1H
CPDPRG[2]     waltz16
PCPD2         90.00 usec
PLW2          16.00000000 W
PLW12         0.18777999 W
PLW13         0.15210000 W

F2 - Processing parameters
SI            32768
SF            100.6127554 MHz
WDW           EM
SSB           0
LB            2.00 Hz
GB            0
PC            1.40
    
```

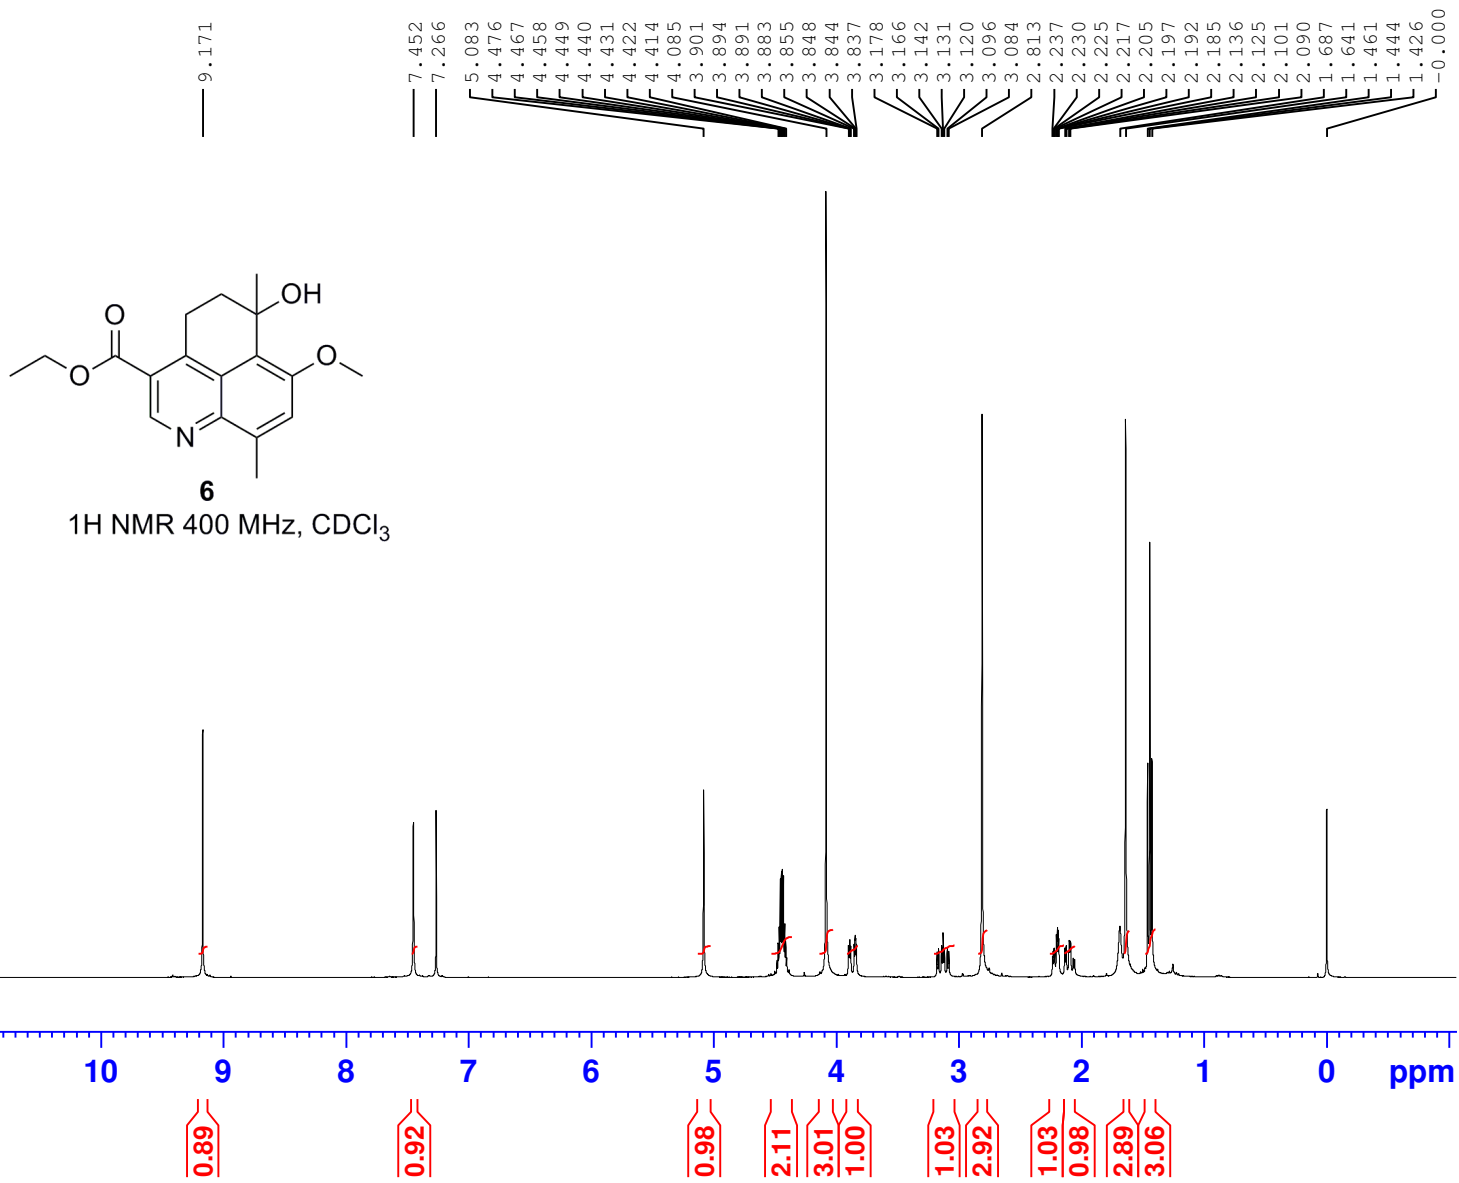

```

Current Data Parameters
NAME      511809A0037
EXPNO     1
PROCNO    1

F2 - Acquisition Parameters
Date_     20180903
Time      7.25
INSTRUM   spect
PROBHD    5 mm PABBO BB/
PULPROG   zg30
TD         65536
SOLVENT   CDC13
NS         16
DS         2
SWH        8012.820 Hz
FIDRES     0.122266 Hz
AQ         4.0894465 sec
RG         110.59
DW         62.400 usec
DE         6.50 usec
TE         298.2 K
D1         1.00000000 sec
TD0        1

===== CHANNEL f1 =====
SFO1      400.1324710 MHz
NUC1       1H
P1         9.75 usec
PLW1      16.00000000 W

F2 - Processing parameters
SI         65536
SF         400.1300072 MHz
WDW        EM
SSB        0
LB         0.30 Hz
GB         0
PC         1.00
    
```

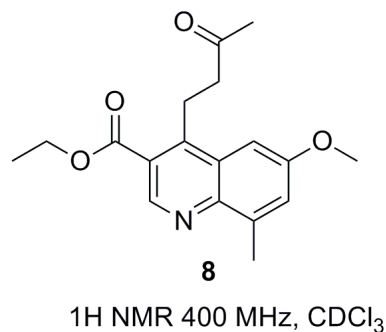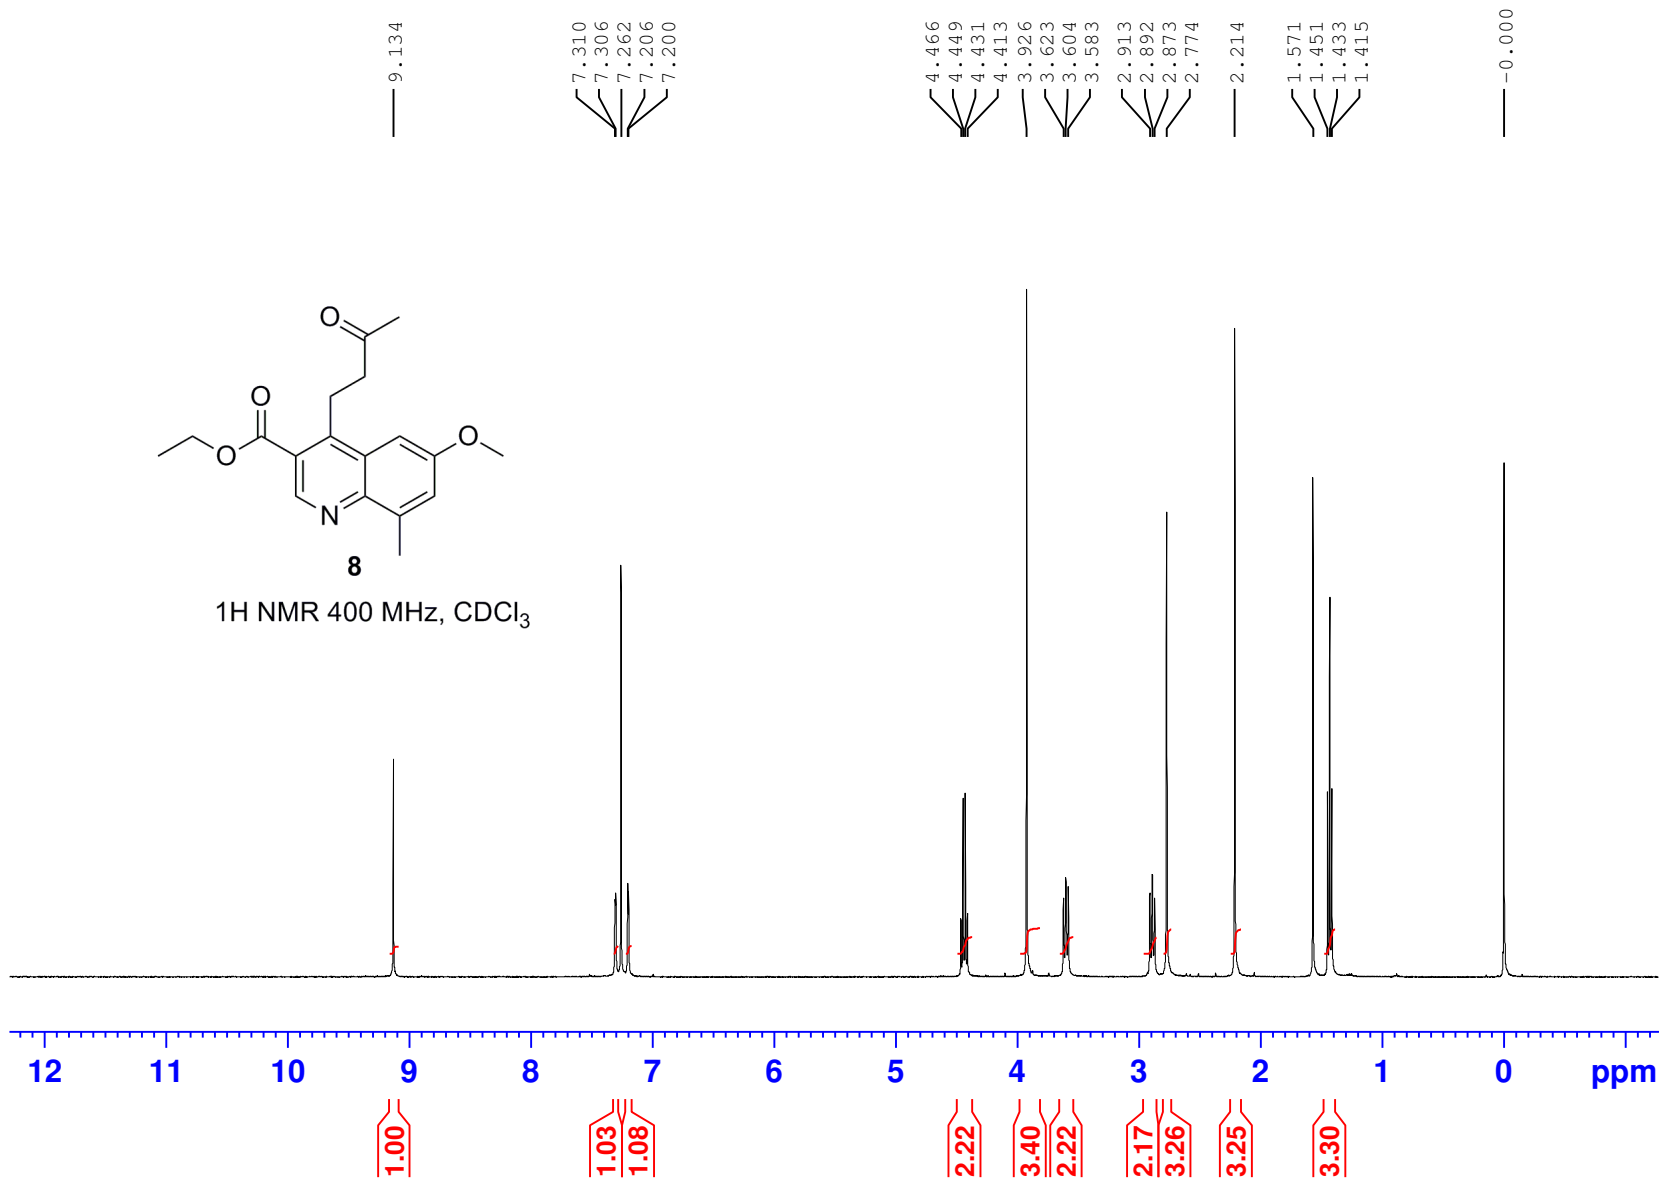

```

Current Data Parameters
NAME      511903B9690
EXPNO     1
PROCNO    1

F2 - Acquisition Parameters
Date_     20190322
Time      7.52
INSTRUM   spect
PROBHD    5 mm PABBO BB/
PULPROG   zg30
TD         65536
SOLVENT   CDC13
NS         8
DS         2
SWH        8012.820 Hz
FIDRES     0.122266 Hz
AQ         4.0894465 sec
RG         110.59
DW         62.400 usec
DE         6.50 usec
TE         298.2 K
D1         1.00000000 sec
TD0        1

===== CHANNEL f1 =====
SFO1      400.1324710 MHz
NUC1       1H
P1         9.75 usec
PLW1      16.00000000 W

F2 - Processing parameters
SI         65536
SF         400.1300089 MHz
WDW        EM
SSB        0
LB         0.30 Hz
GB         0
PC         1.00
    
```

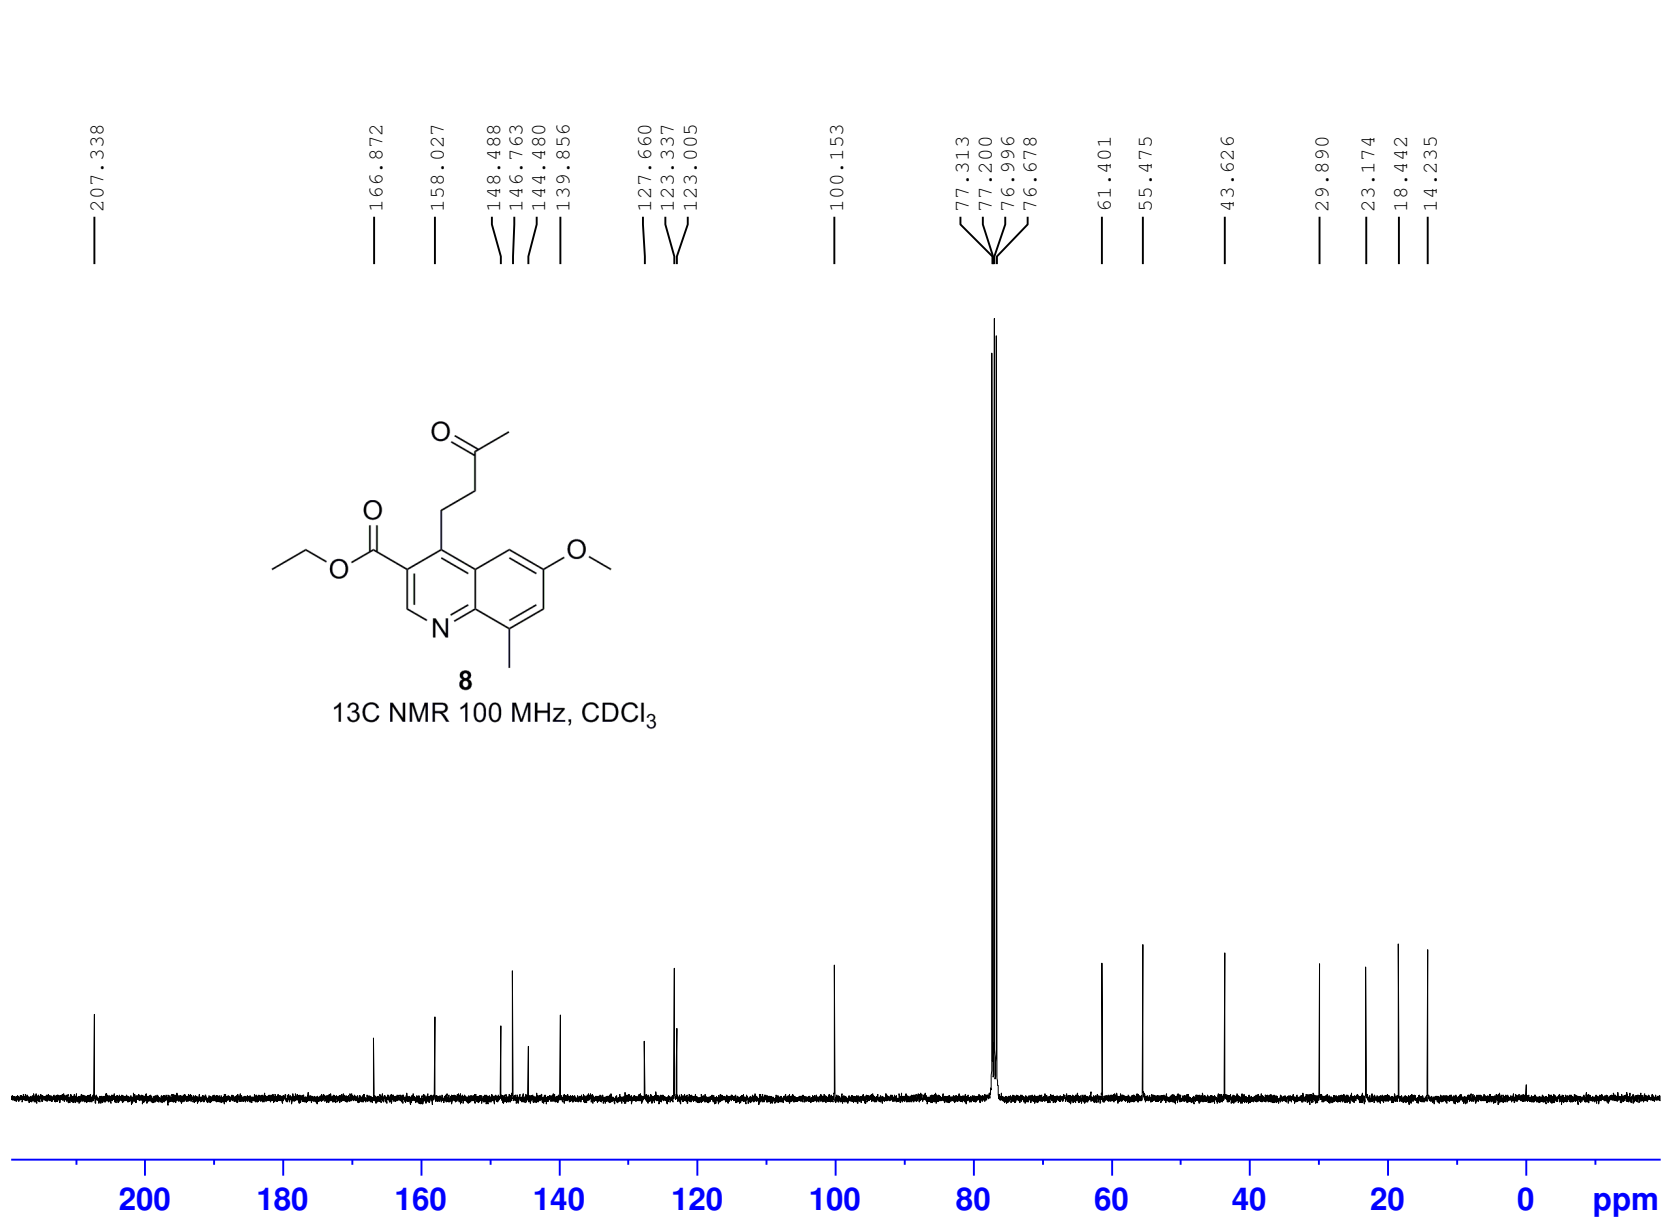

```

Current Data Parameters
NAME      511903C0629
EXPNO     2
PROCNO    1

F2 - Acquisition Parameters
Date_     20190323
Time      22.05
INSTRUM   spect
PROBHD    5 mm PABBO BB/
PULPROG   zgpg30
TD         65536
SOLVENT   CDC13
NS         1024
DS         4
SWH        24038.461 Hz
FIDRES     0.366798 Hz
AQ         1.3631488 sec
RG         195.29
DW         20.800 usec
DE         6.50 usec
TE         299.0 K
D1         3.00000000 sec
D11        0.03000000 sec
TD0        1

===== CHANNEL f1 =====
SFO1      100.6228293 MHz
NUC1       13C
P1         10.00 usec
PLW1       78.00000000 W

===== CHANNEL f2 =====
SFO2      400.1316005 MHz
NUC2       1H
CPDPRG[2] waltz16
PCPD2     90.00 usec
PLW2      16.00000000 W
PLW12     0.18777999 W
PLW13     0.15210000 W

F2 - Processing parameters
SI         32768
SF         100.6127712 MHz
WDW        EM
SSB        0
LB         1.00 Hz
GB         0
PC         1.40
    
```

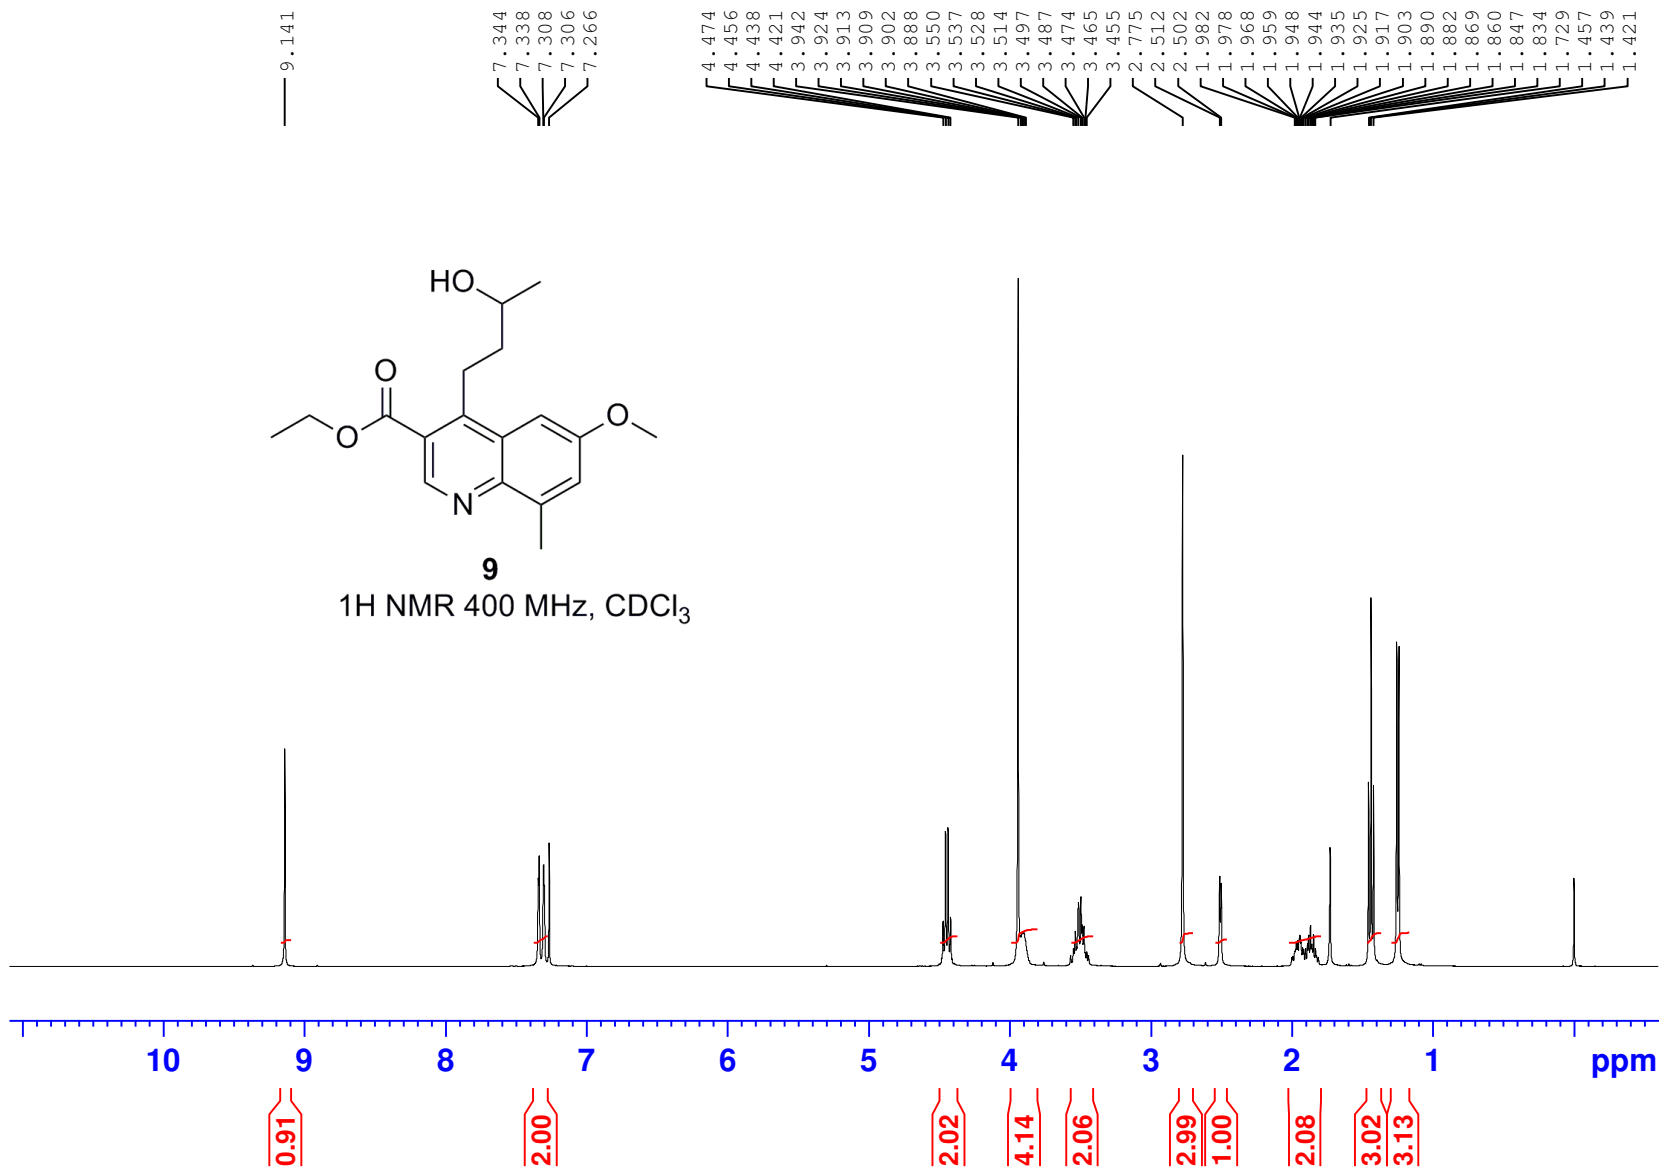

Current Data Parameters  
 NAME 511903C0627  
 EXPNO 1  
 PROCNO 1

F2 - Acquisition Parameters  
 Date\_ 20190323  
 Time 7.22  
 INSTRUM spect  
 PROBHD 5 mm PABBO BB/  
 PULPROG zg30  
 TD 65536  
 SOLVENT CDCl3  
 NS 16  
 DS 2  
 SWH 8012.820 Hz  
 FIDRES 0.122266 Hz  
 AQ 4.0894465 sec  
 RG 96.76  
 DW 62.400 usec  
 DE 6.50 usec  
 TE 298.1 K  
 D1 1.00000000 sec  
 TD0 1

===== CHANNEL f1 =====  
 SFO1 400.1324710 MHz  
 NUC1 1H  
 P1 9.75 usec  
 PLW1 16.00000000 W

F2 - Processing parameters  
 SI 65536  
 SF 400.1300069 MHz  
 WDW EM  
 SSB 0  
 LB 0.30 Hz  
 GB 0  
 PC 1.00

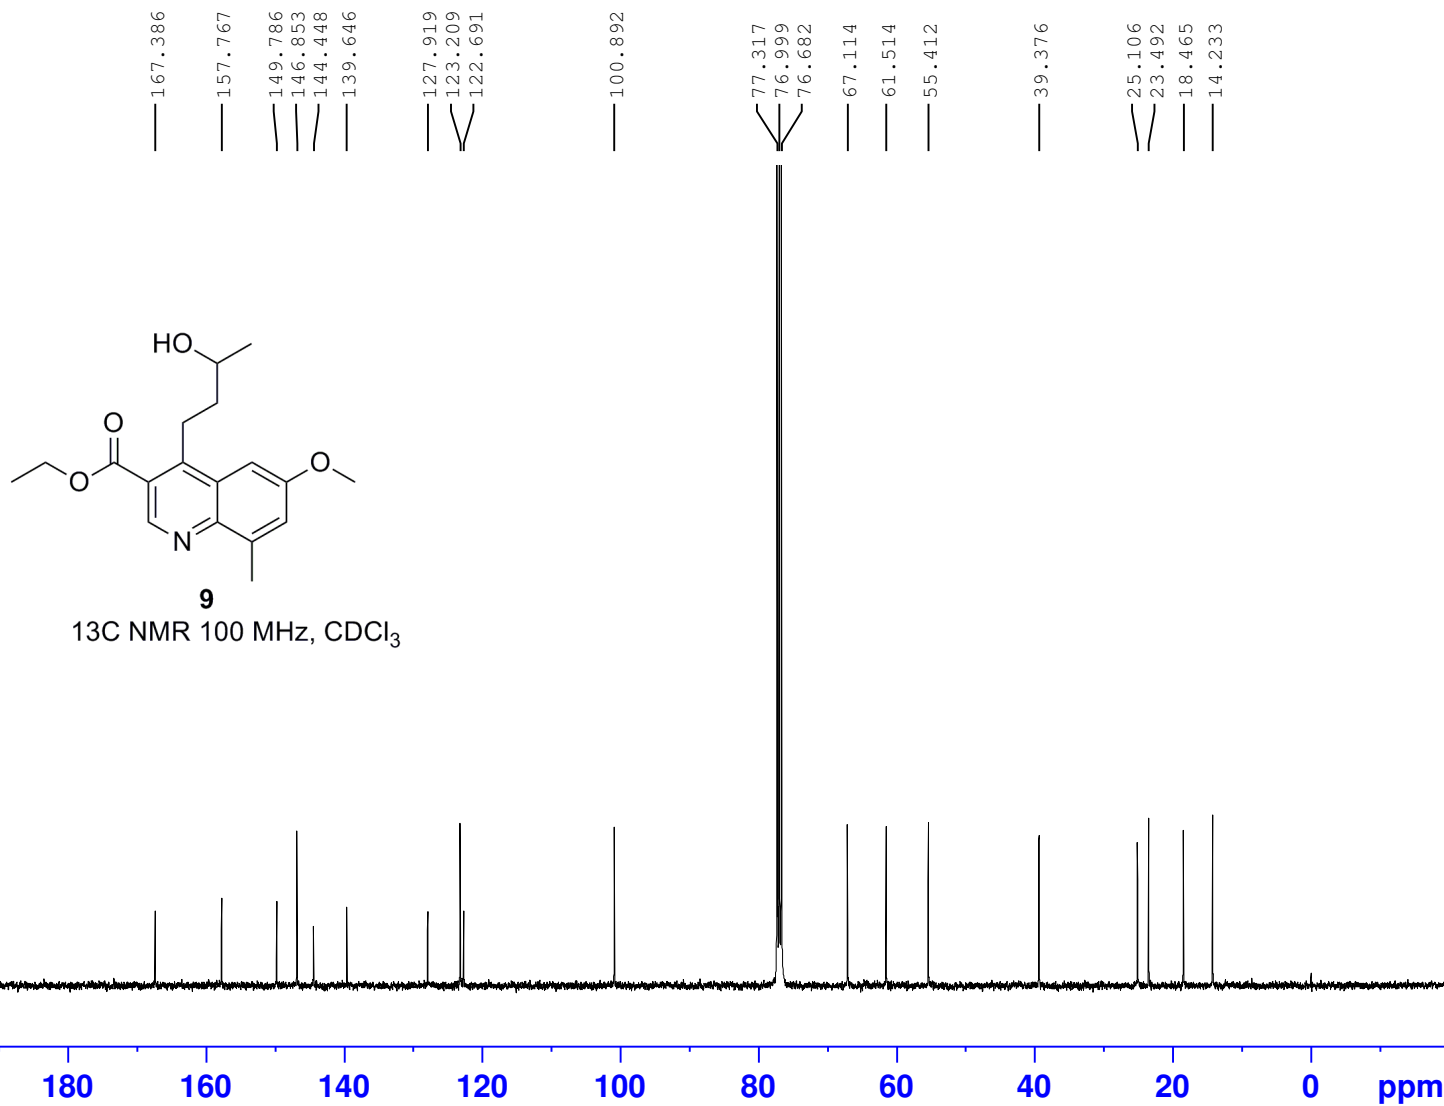

Current Data Parameters  
 NAME 511903C0627  
 EXPNO 2  
 PROCNO 1

F2 - Acquisition Parameters  
 Date\_ 20190323  
 Time 8.40  
 INSTRUM spect  
 PROBHD 5 mm PABBO BB/  
 PULPROG zgpg30  
 TD 65536  
 SOLVENT CDC13  
 NS 1024  
 DS 4  
 SWH 24038.461 Hz  
 FIDRES 0.366798 Hz  
 AQ 1.3631488 sec  
 RG 195.29  
 DW 20.800 usec  
 DE 6.50 usec  
 TE 298.2 K  
 D1 3.00000000 sec  
 D11 0.03000000 sec  
 TD0 1

==== CHANNEL f1 =====  
 SFO1 100.6228293 MHz  
 NUC1 13C  
 P1 10.00 usec  
 PLW1 78.0000000 W

==== CHANNEL f2 =====  
 SFO2 400.1316005 MHz  
 NUC2 1H  
 CPDPRG[2] waltz16  
 PCPD2 90.00 usec  
 PLW2 16.00000000 W  
 PLW12 0.18777999 W  
 PLW13 0.15210000 W

F2 - Processing parameters  
 SI 32768  
 SF 100.6127713 MHz  
 WDW EM  
 SSB 0  
 LB 2.00 Hz  
 GB 0  
 PC 1.40



TP-MA-1158-13

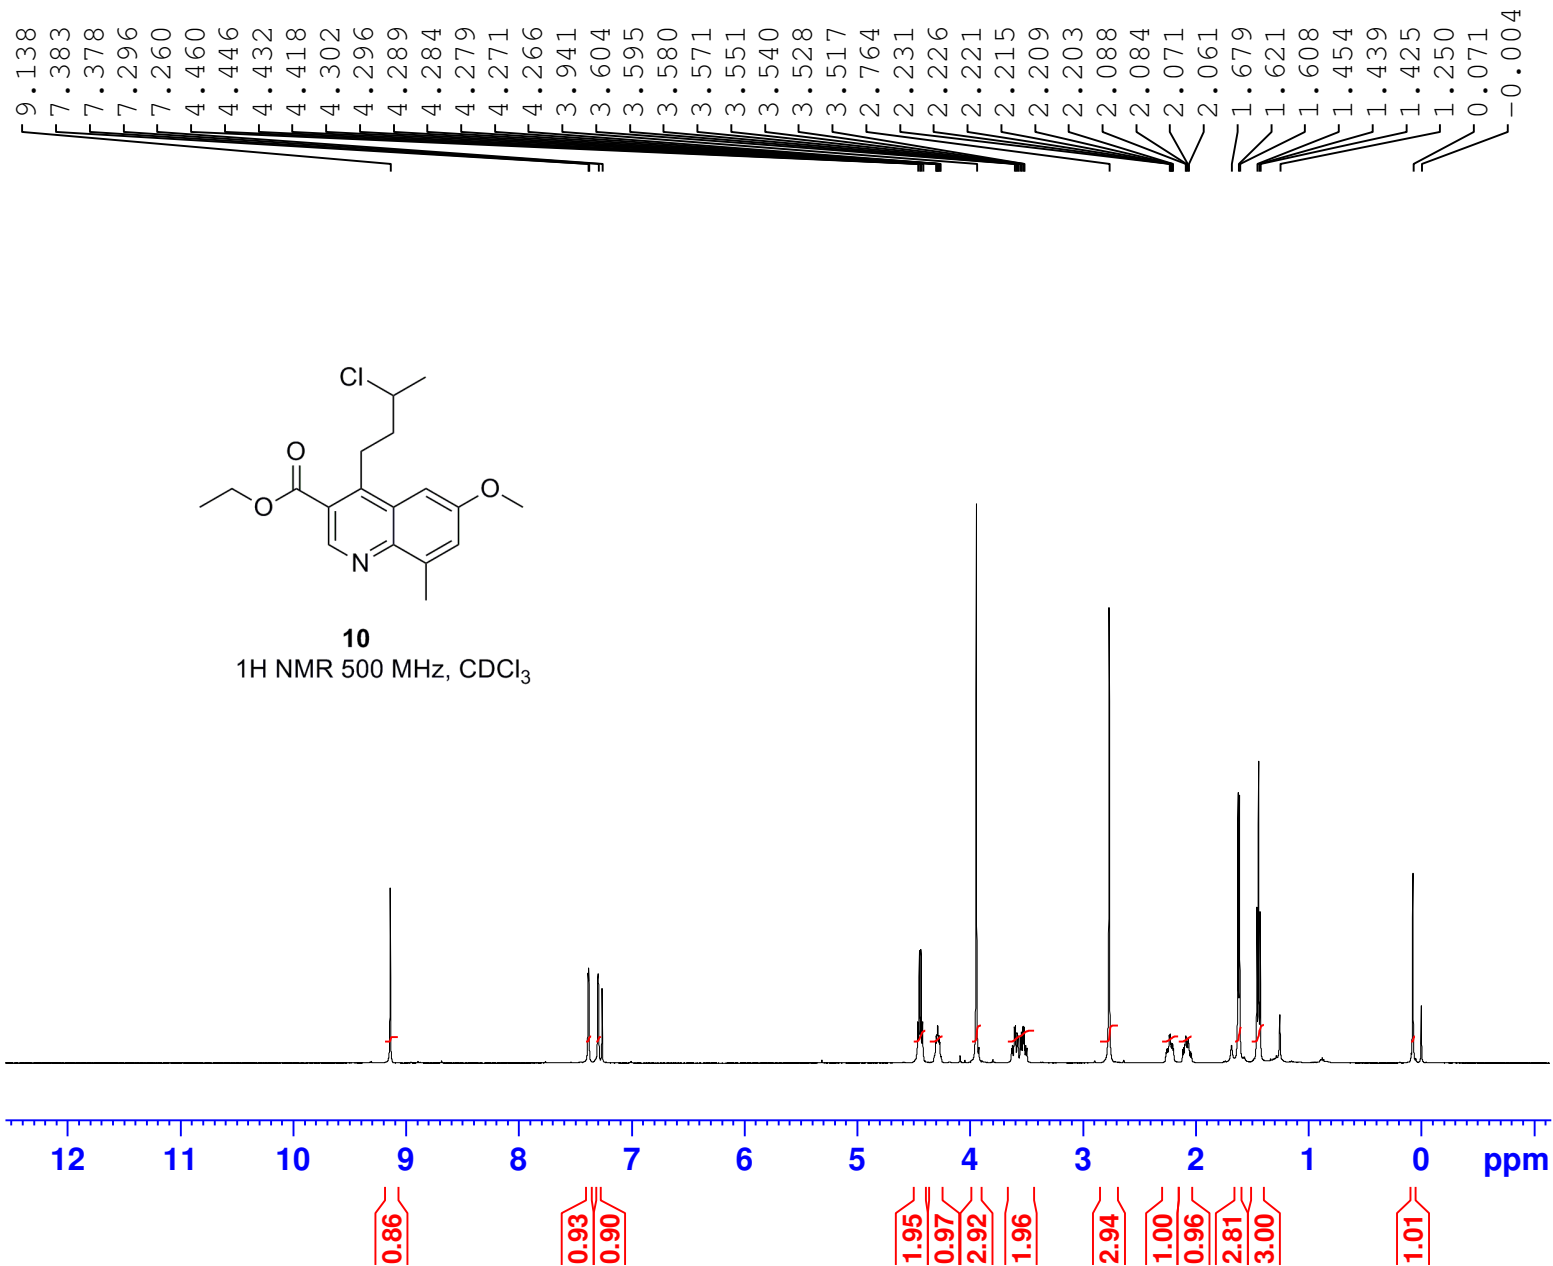

Current Data Parameters  
NAME 511903C1076  
EXPNO 1  
PROCNO 1

F2 - Acquisition Parameters  
Date\_ 20190325  
Time 20.07 h  
INSTRUM spect  
PROBHD z119470\_0294 (  
PULPROG zg30  
TD 65536  
SOLVENT CDCl3  
NS 8  
DS 0  
SWH 10000.000 Hz  
FIDRES 0.152588 Hz  
AQ 3.2767999 sec  
RG 79.68  
DW 50.000 usec  
DE 6.50 usec  
TE 300.2 K  
D1 1.00000000 sec  
TD0 1  
SFO1 500.1330885 MHz  
NUC1 1H  
P1 10.00 usec  
PLW1 20.38699913 W

F2 - Processing parameters  
SI 65536  
SF 500.1300127 MHz  
WDW EM  
SSB 0  
LB 0.30 Hz  
GB 0  
PC 1.00

TP-MA-1158-13

— 166.904  
— 157.974  
— 148.590  
— 146.790  
— 144.515  
— 139.610  
— 127.906  
— 123.612  
— 122.811

— 100.358

— 77.251  
— 76.997  
— 76.743  
— 61.315  
— 59.481  
— 55.538

— 40.287

— 26.341  
— 25.314  
— 18.409  
— 14.274

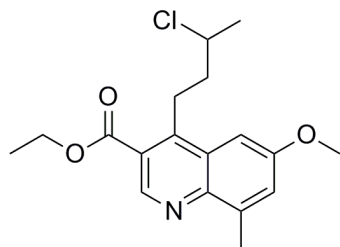

**10**  
13C NMR 125 MHz, CDCl<sub>3</sub>

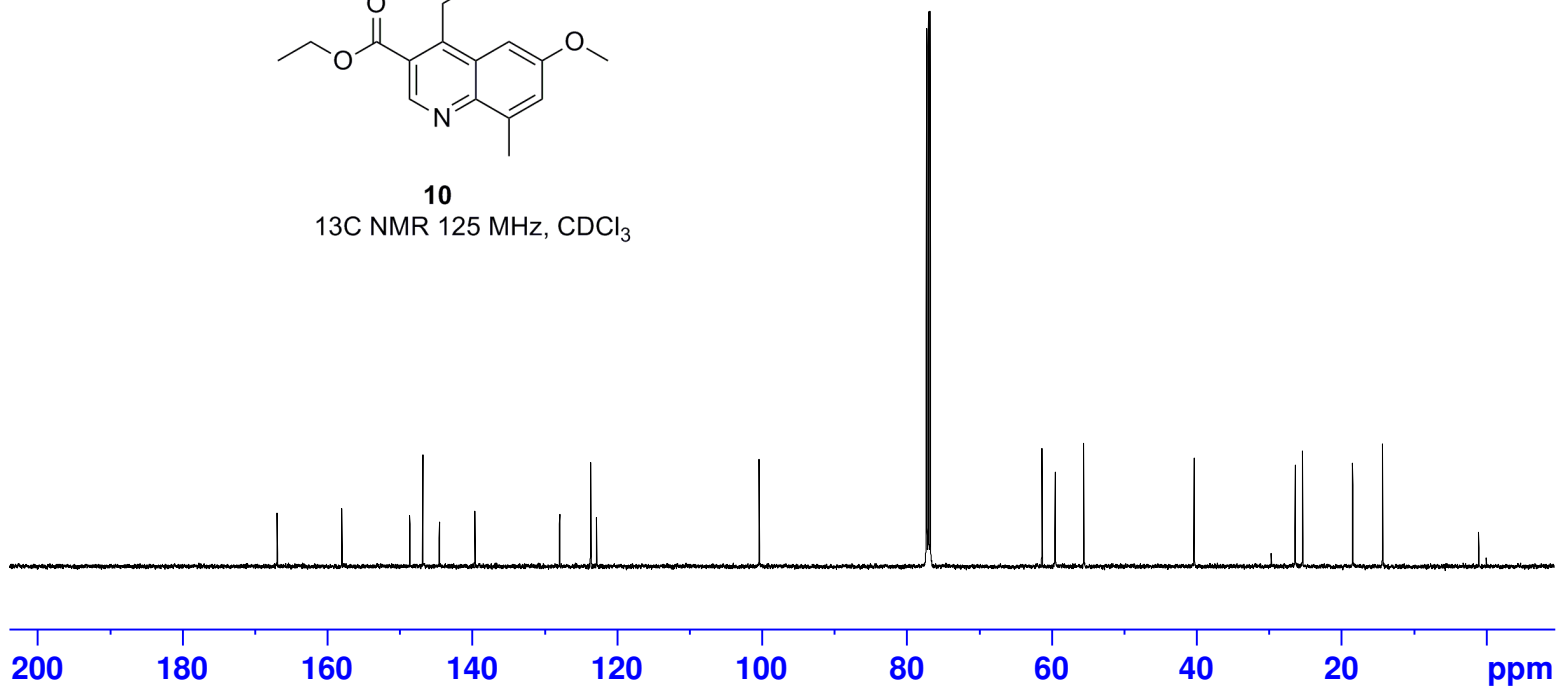

Current Data Parameters  
NAME 511903C1076  
EXPNO 2  
PROCNO 1

F2 - Acquisition Parameters  
Date\_ 20190325  
Time 20.10 h  
INSTRUM spect  
PROBHD z119470\_0294 (  
PULPROG zgpg30  
TD 65536  
SOLVENT CDCl3  
NS 591  
DS 4  
SWH 29761.904 Hz  
FIDRES 0.454131 Hz  
AQ 1.1010048 sec  
RG 197.72  
DW 16.800 usec  
DE 6.50 usec  
TE 300.3 K  
D1 3.0000000 sec  
D11 0.0300000 sec  
TD0 1  
SFO1 125.7703643 MHz  
NUC1 13C  
P1 10.00 usec  
PLW1 79.88800049 W  
SFO2 500.1320005 MHz  
NUC2 1H  
CPDPRG[2] waltz16  
PCPD2 90.00 usec  
PLW2 20.38699913 W  
PLW12 0.25169000 W  
PLW13 0.16023000 W

F2 - Processing parameters  
SI 32768  
SF 125.7577920 MHz  
WDW EM  
SSB 0  
LB 2.00 Hz  
GB 0  
PC 1.40

TP--MA-1158-14

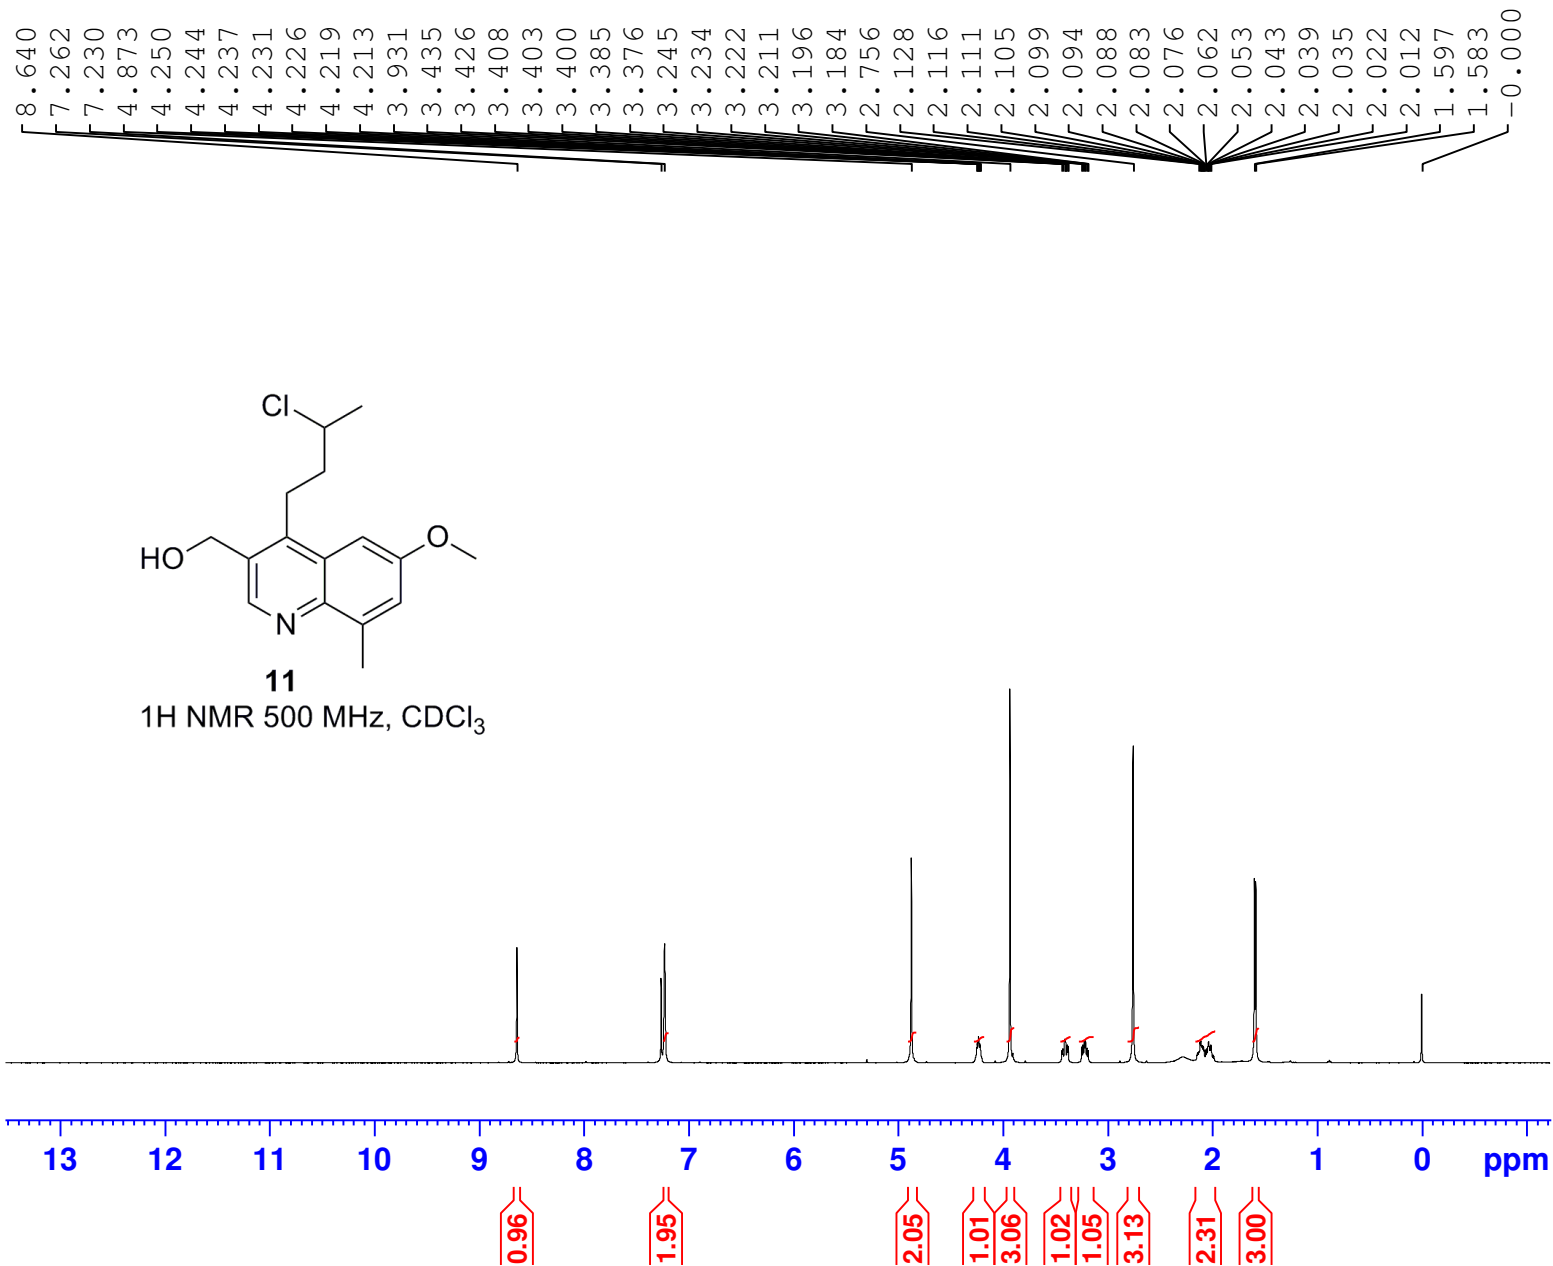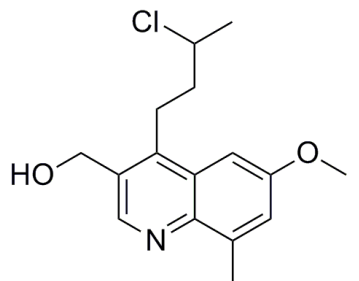

11

<sup>1</sup>H NMR 500 MHz, CDCl<sub>3</sub>

Current Data Parameters  
NAME 511903C1077  
EXPNO 1  
PROCNO 1

F2 - Acquisition Parameters  
Date\_ 20190325  
Time 20.55 h  
INSTRUM spect  
PROBHD z119470\_0294 (  
PULPROG zg30  
TD 65536  
SOLVENT CDCl3  
NS 8  
DS 0  
SWH 10000.000 Hz  
FIDRES 0.152588 Hz  
AQ 3.2767999 sec  
RG 111.07  
DW 50.000 usec  
DE 6.50 usec  
TE 298.1 K  
D1 1.00000000 sec  
TD0 1  
SFO1 500.1330885 MHz  
NUC1 1H  
P1 10.00 usec  
PLW1 20.38699913 W

F2 - Processing parameters  
SI 65536  
SF 500.1300117 MHz  
WDW EM  
SSB 0  
LB 0.30 Hz  
GB 0  
PC 1.00

TP--MA-1158-14

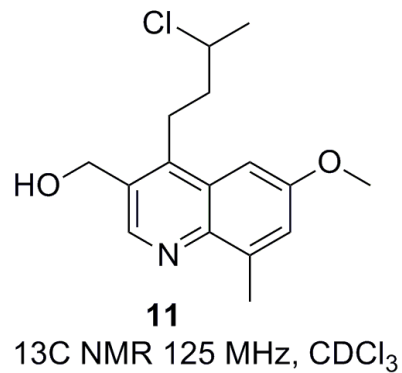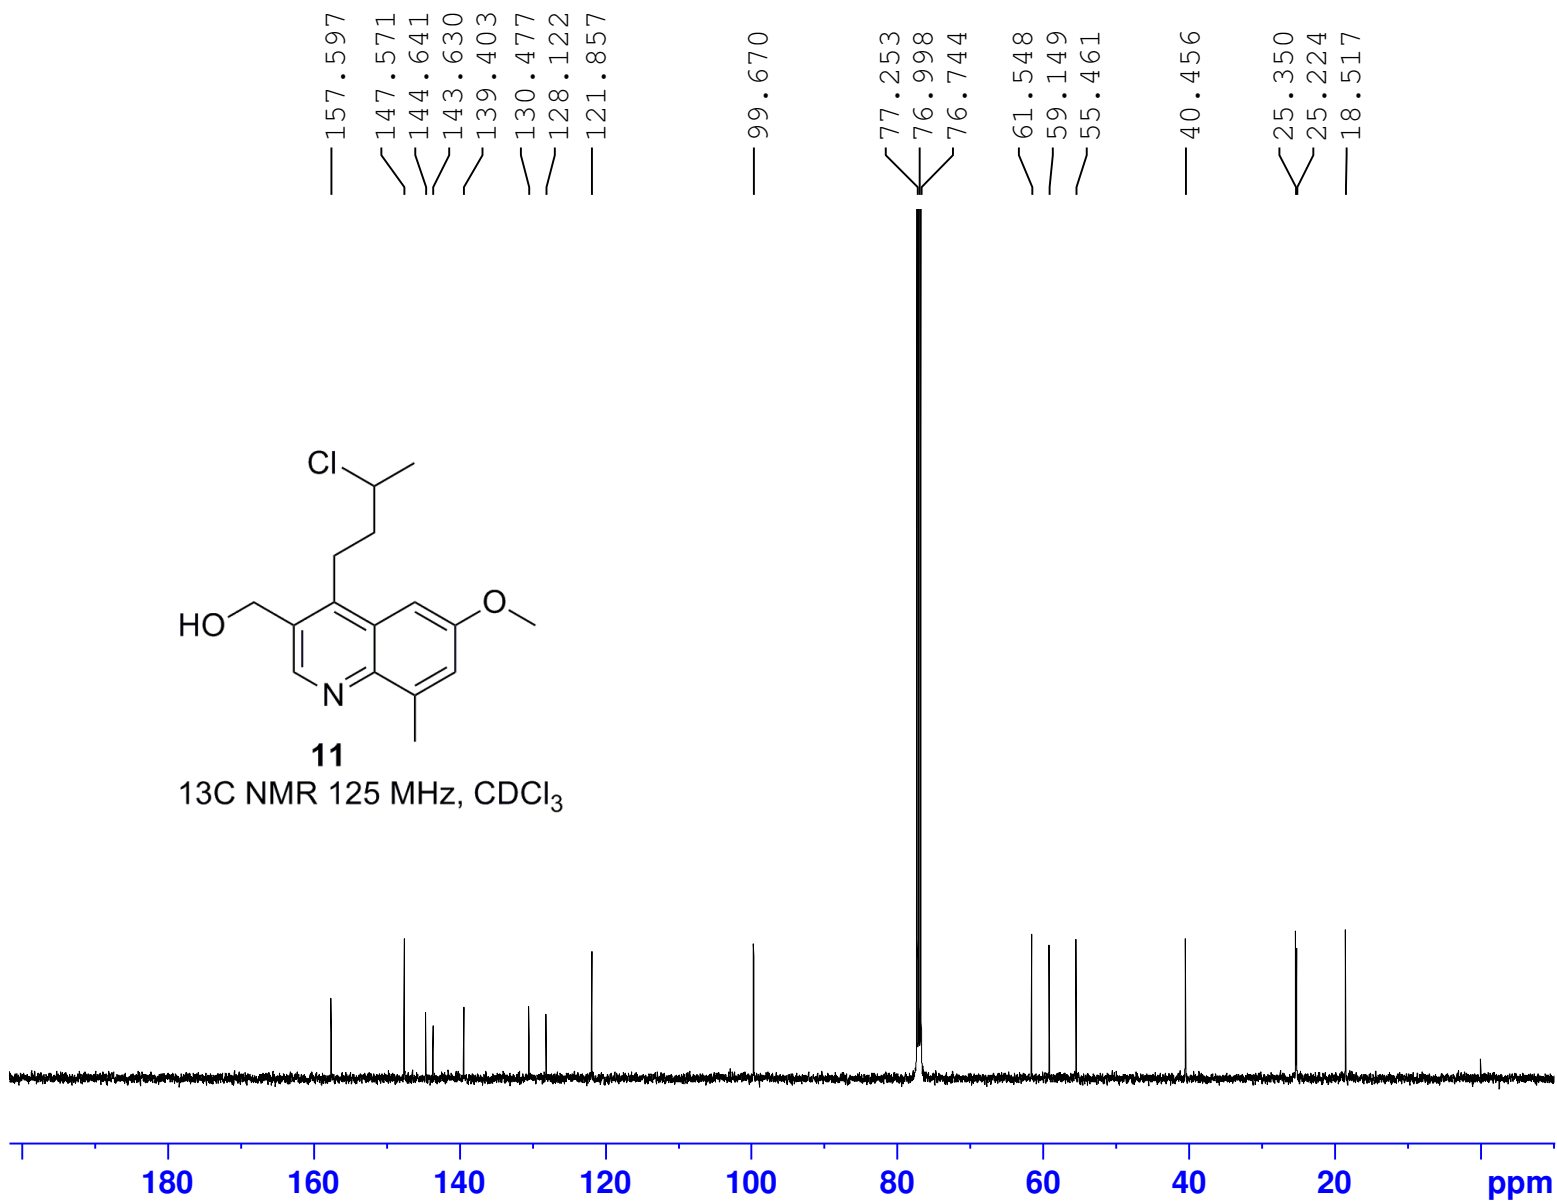

Current Data Parameters  
NAME 511903C1077  
EXPNO 2  
PROCNO 1

F2 - Acquisition Parameters  
Date\_ 20190325  
Time 21.01 h  
INSTRUM spect  
PROBHD z119470\_0294 (  
PULPROG zgpg30  
TD 65536  
SOLVENT CDCl3  
NS 380  
DS 4  
SWH 29761.904 Hz  
FIDRES 0.454131 Hz  
AQ 1.1010048 sec  
RG 197.72  
DW 16.800 usec  
DE 6.50 usec  
TE 298.1 K  
D1 3.0000000 sec  
D11 0.0300000 sec  
TD0 1  
SFO1 125.7703643 MHz  
NUC1 13C  
P1 10.00 usec  
PLW1 79.88800049 W  
SFO2 500.1320005 MHz  
NUC2 1H  
CPDPRG[2] waltz16  
PCPD2 90.00 usec  
PLW2 20.38699913 W  
PLW12 0.25169000 W  
PLW13 0.16023000 W

F2 - Processing parameters  
SI 32768  
SF 125.7577920 MHz  
WDW EM  
SSB 0  
LB 2.00 Hz  
GB 0  
PC 1.40

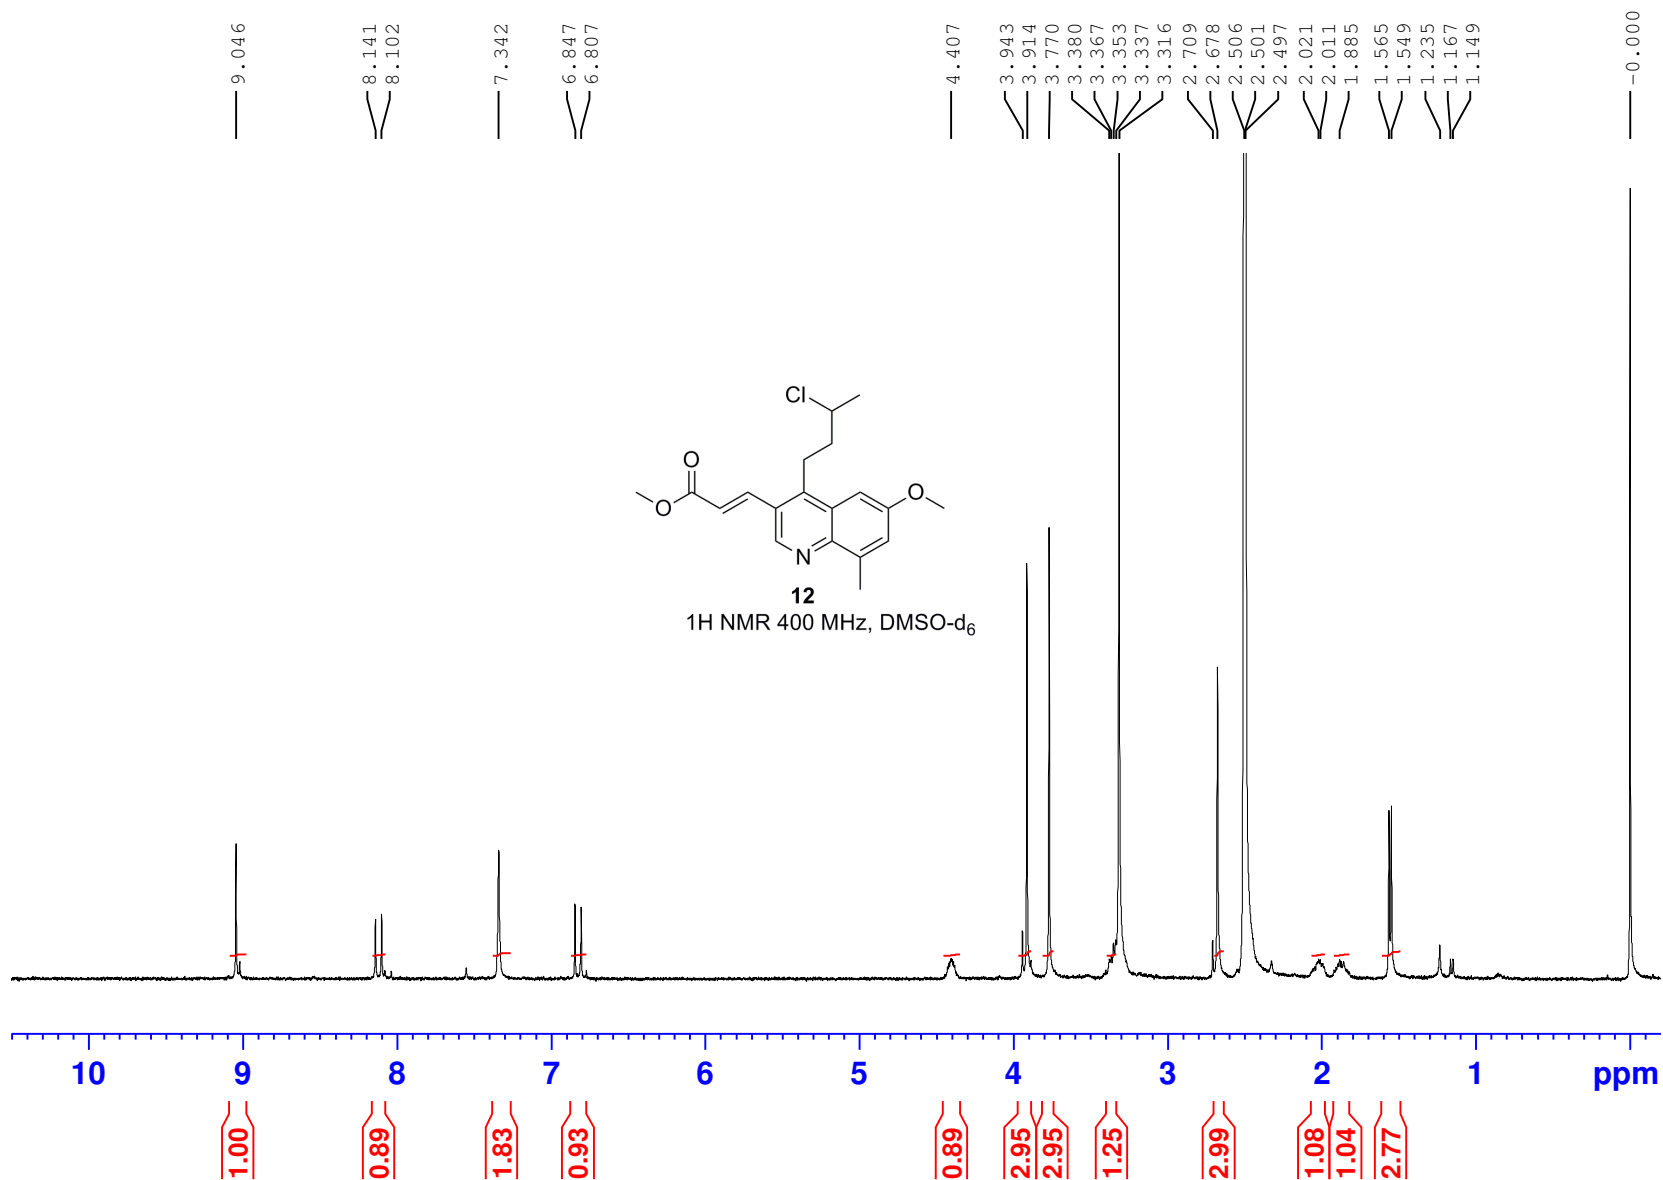

Current Data Parameters  
 NAME 511903B9686  
 EXPNO 1  
 PROCNO 1

F2 - Acquisition Parameters  
 Date\_ 20190322  
 Time 9.20  
 INSTRUM spect  
 PROBHD 5 mm PABBO BB/  
 PULPROG zg30  
 TD 65536  
 SOLVENT DMSO  
 NS 8  
 DS 2  
 SWH 8012.820 Hz  
 FIDRES 0.122266 Hz  
 AQ 4.0894465 sec  
 RG 195.29  
 DW 62.400 usec  
 DE 6.50 usec  
 TE 298.2 K  
 D1 1.00000000 sec  
 TD0 1

===== CHANNEL f1 =====  
 SFO1 400.1324710 MHz  
 NUC1 1H  
 P1 9.75 usec  
 PLW1 16.00000000 W

F2 - Processing parameters  
 SI 65536  
 SF 400.1300025 MHz  
 WDW EM  
 SSB 0  
 LB 0.30 Hz  
 GB 0  
 PC 1.00

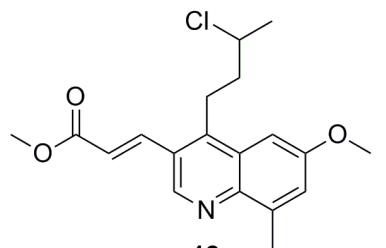

**12**  
13C NMR 100 MHz, CDCl<sub>3</sub>

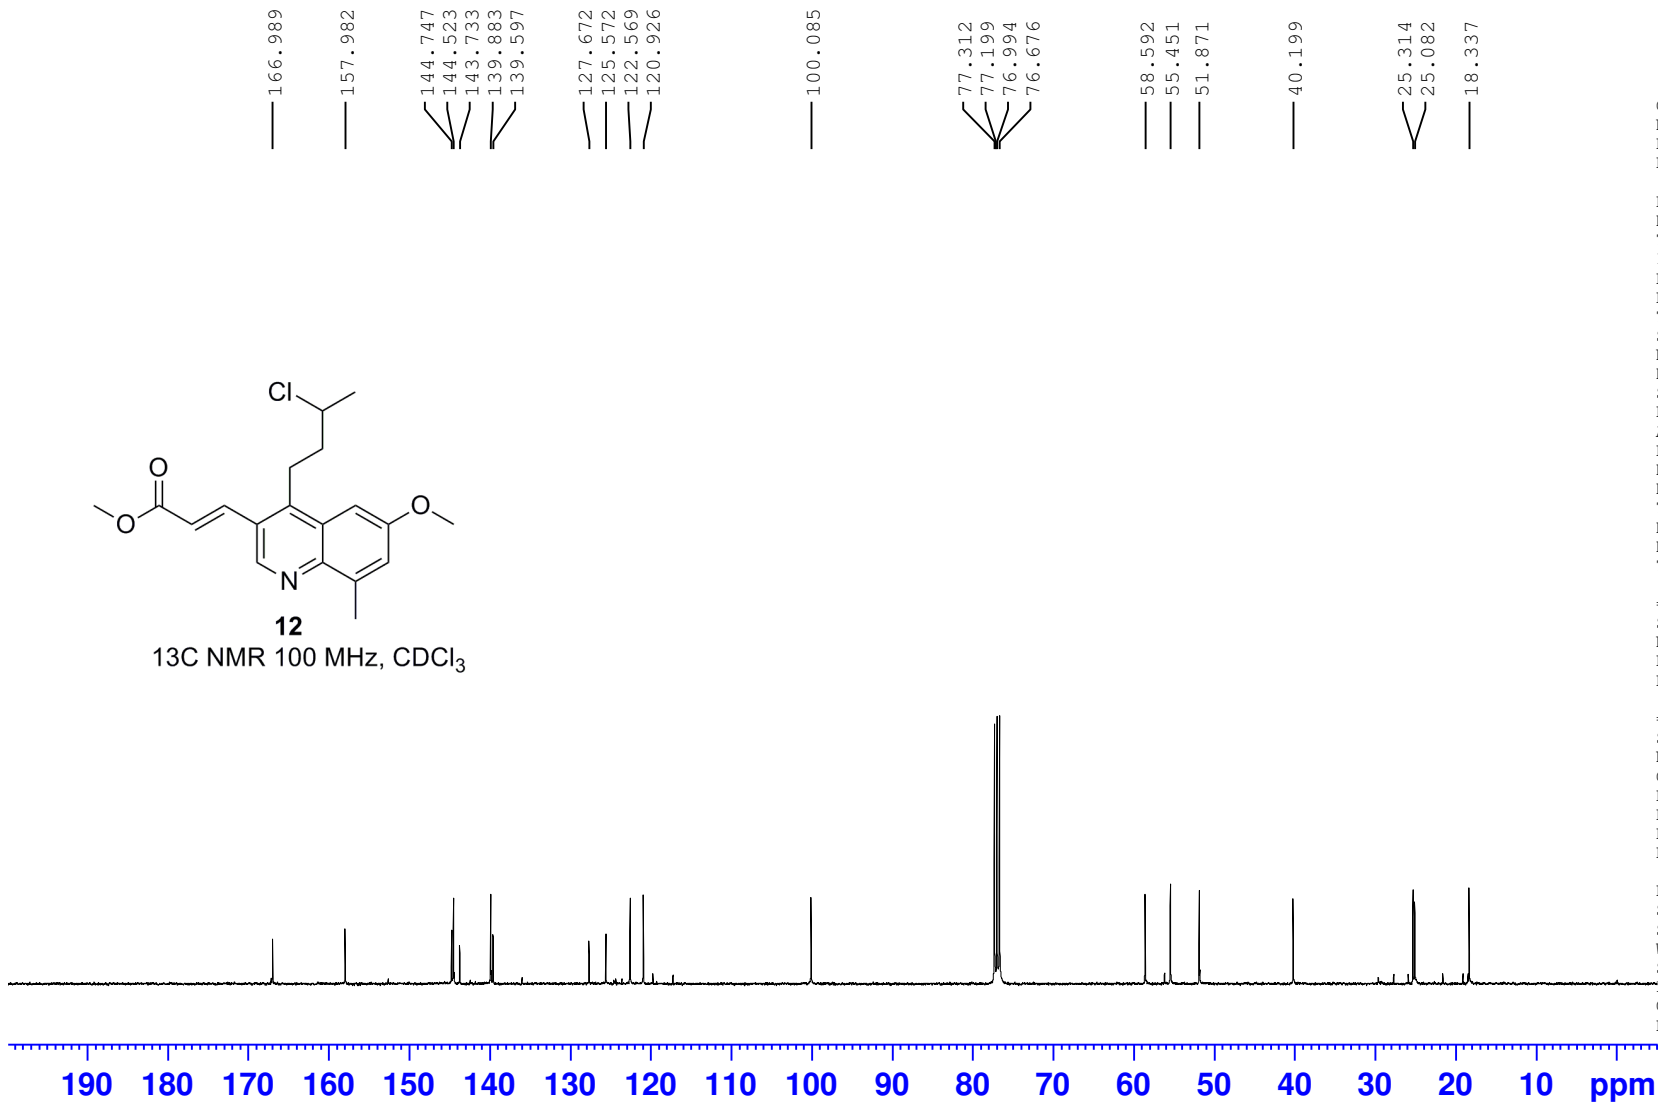

Current Data Parameters  
 NAME 511903C0565  
 EXPNO 2  
 PROCNO 1

F2 - Acquisition Parameters  
 Date\_ 20190324  
 Time 2.08  
 INSTRUM spect  
 PROBHD 5 mm PABBO BB/  
 PULPROG zgpg30  
 TD 65536  
 SOLVENT CDCl3  
 NS 1024  
 DS 4  
 SWH 24038.461 Hz  
 FIDRES 0.366798 Hz  
 AQ 1.3631488 sec  
 RG 195.29  
 DW 20.800 usec  
 DE 6.50 usec  
 TE 298.4 K  
 D1 3.00000000 sec  
 D11 0.03000000 sec  
 TD0 1

===== CHANNEL f1 =====  
 SFO1 100.6228293 MHz  
 NUC1 13C  
 P1 10.00 usec  
 PLW1 78.00000000 W

===== CHANNEL f2 =====  
 SFO2 400.1316005 MHz  
 NUC2 1H  
 CPDPRG[2] waltz16  
 PCPD2 90.00 usec  
 PLW2 16.00000000 W  
 PLW12 0.18777999 W  
 PLW13 0.15210000 W

F2 - Processing parameters  
 SI 32768  
 SF 100.6127735 MHz  
 WDW EM  
 SSB 0  
 LB 2.00 Hz  
 GB 0  
 PC 1.40

TP-MA-1158-17

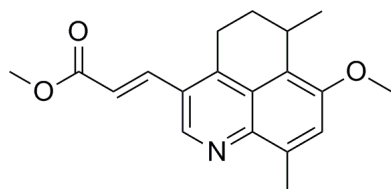

**13**

1H NMR 500 MHz, DMSO-d<sub>6</sub>

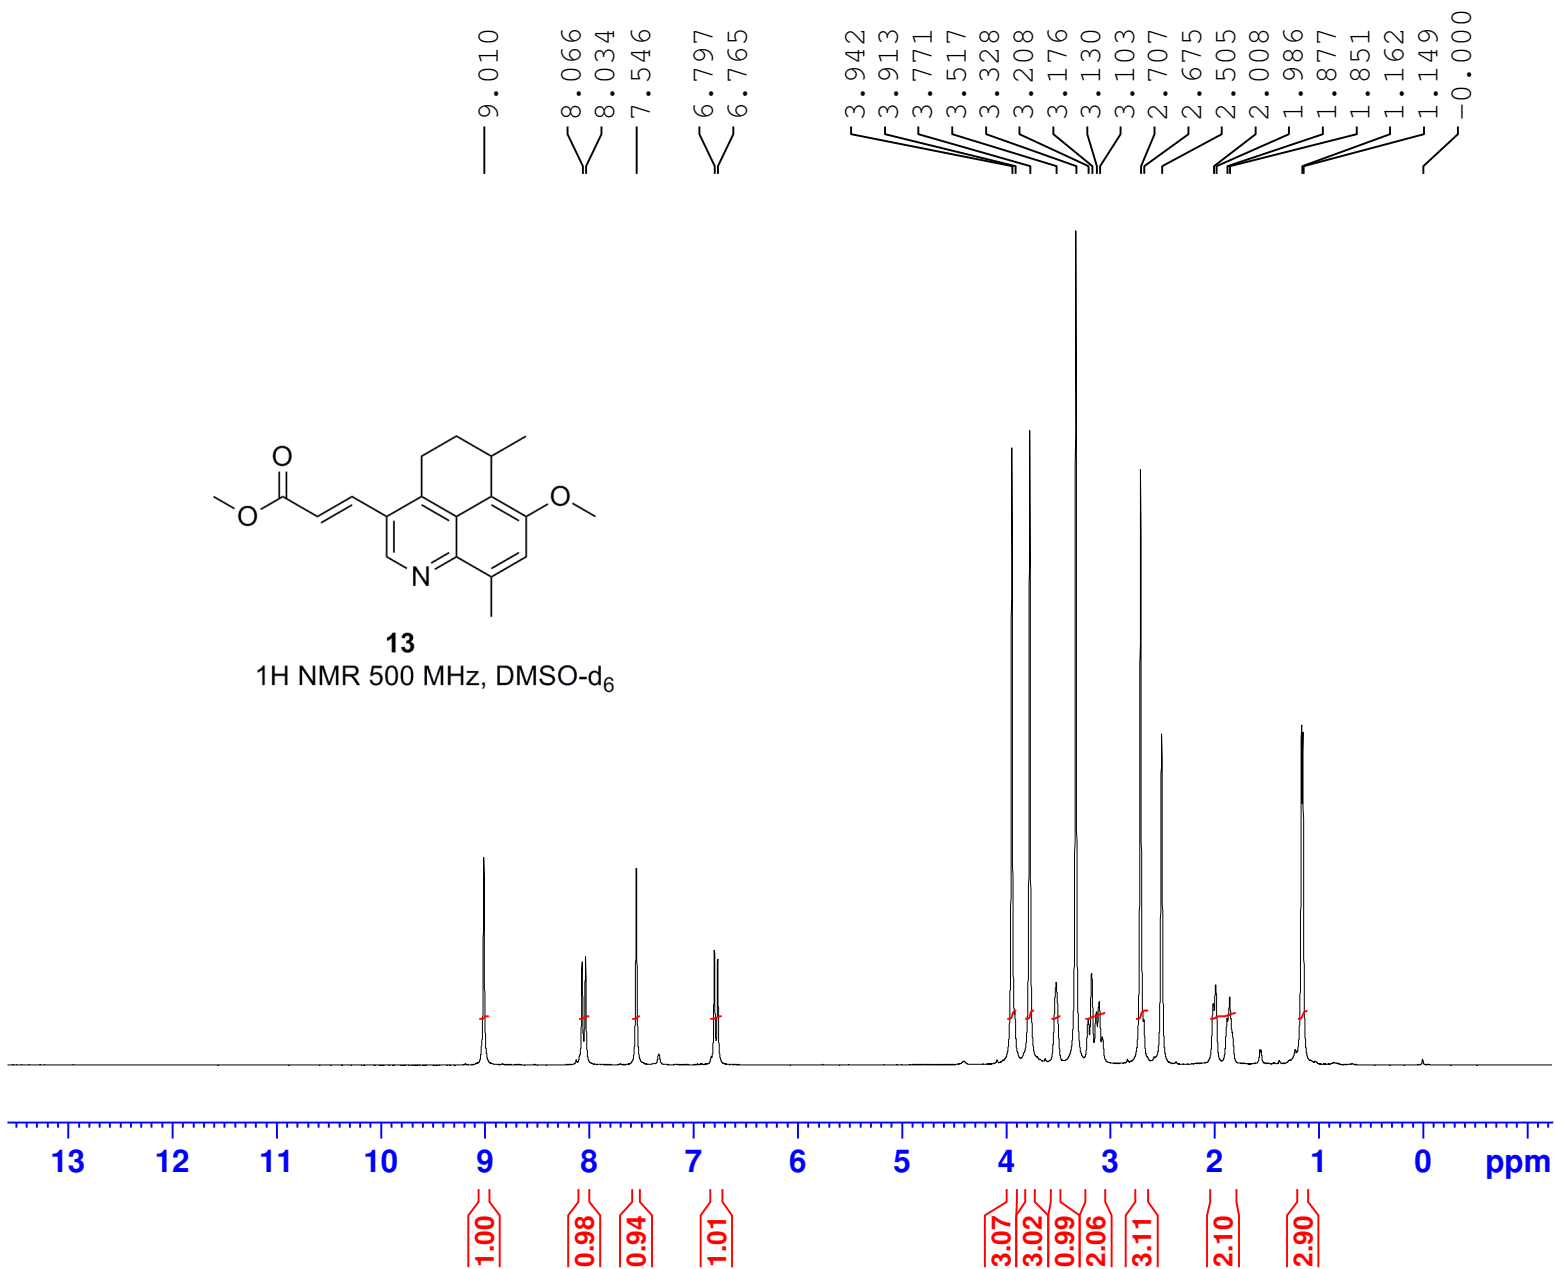

Current Data Parameters  
NAME 511903B6921  
EXPNO 1  
PROCNO 1

F2 - Acquisition Parameters  
Date\_ 20190319  
Time 13.31 h  
INSTRUM spect  
PROBHD z119470\_0294 (  
PULPROG zg30  
TD 65536  
SOLVENT DMSO  
NS 16  
DS 2  
SWH 10000.000 Hz  
FIDRES 0.152588 Hz  
AQ 3.2767999 sec  
RG 79.68  
DW 50.000 usec  
DE 6.50 usec  
TE 298.2 K  
D1 1.00000000 sec  
TD0 1  
SFO1 500.1330883 MHz  
NUC1 1H  
P1 10.00 usec  
PLW1 20.38699913 W

F2 - Processing parameters  
SI 65536  
SF 500.1300020 MHz  
WDW EM  
SSB 0  
LB 0.30 Hz  
GB 0  
PC 1.00

TP-MA-1158-17

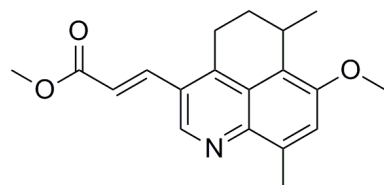

**13**

<sup>13</sup>C NMR 125 MHz, DMSO-d<sub>6</sub>

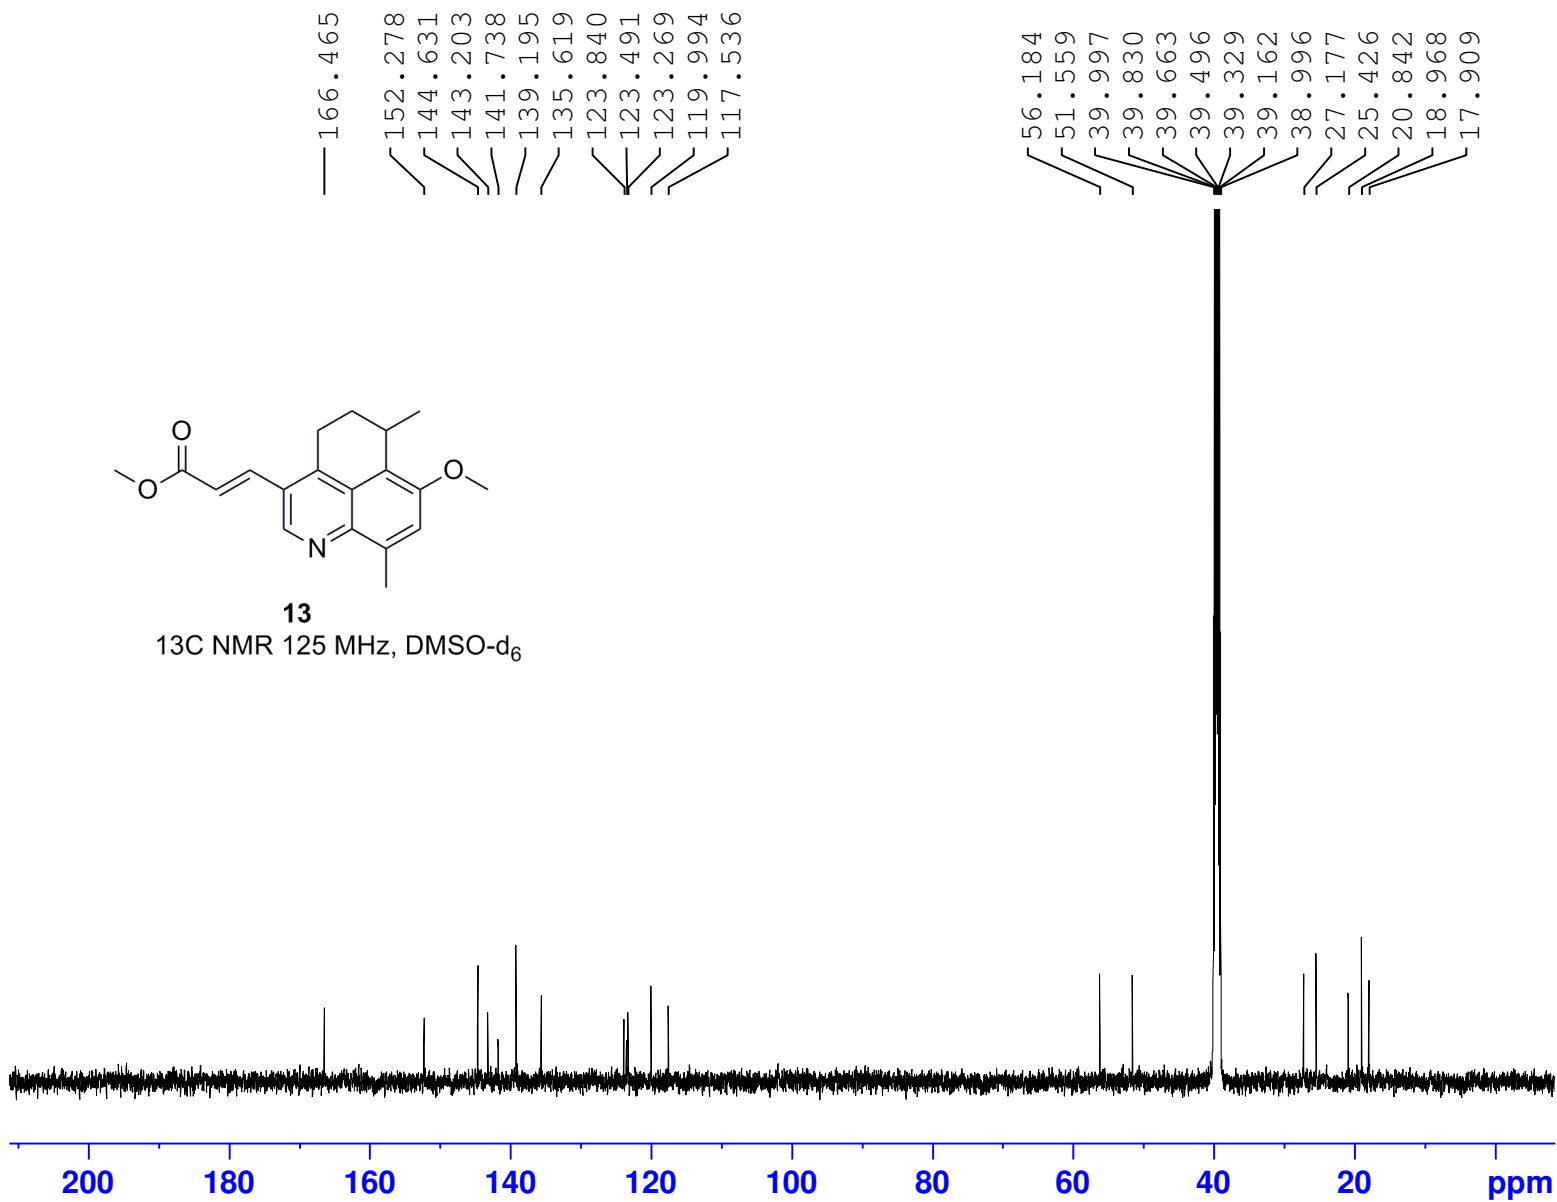

Current Data Parameters  
NAME 511903B7553  
EXPNO 2  
PROCNO 1

F2 - Acquisition Parameters  
Date\_ 20190320  
Time 19.40 h  
INSTRUM spect  
PROBHD z119470\_0294 (  
PULPROG zgpg30  
TD 65536  
SOLVENT DMSO  
NS 290  
DS 4  
SWH 29761.904 Hz  
FIDRES 0.454131 Hz  
AQ 1.1010048 sec  
RG 197.72  
DW 16.800 usec  
DE 6.50 usec  
TE 303.2 K  
D1 3.0000000 sec  
D11 0.0300000 sec  
TD0 1  
SFO1 125.7703643 MHz  
NUC1 13C  
P1 10.00 usec  
PLW1 79.88800049 W  
SFO2 500.1320005 MHz  
NUC2 1H  
CPDPRG[2] waltz16  
PCPD2 90.00 usec  
PLW2 20.38699913 W  
PLW12 0.25169000 W  
PLW13 0.16023000 W

F2 - Processing parameters  
SI 32768  
SF 125.7578535 MHz  
WDW EM  
SSB 0  
LB 2.00 Hz  
GB 0  
PC 1.40



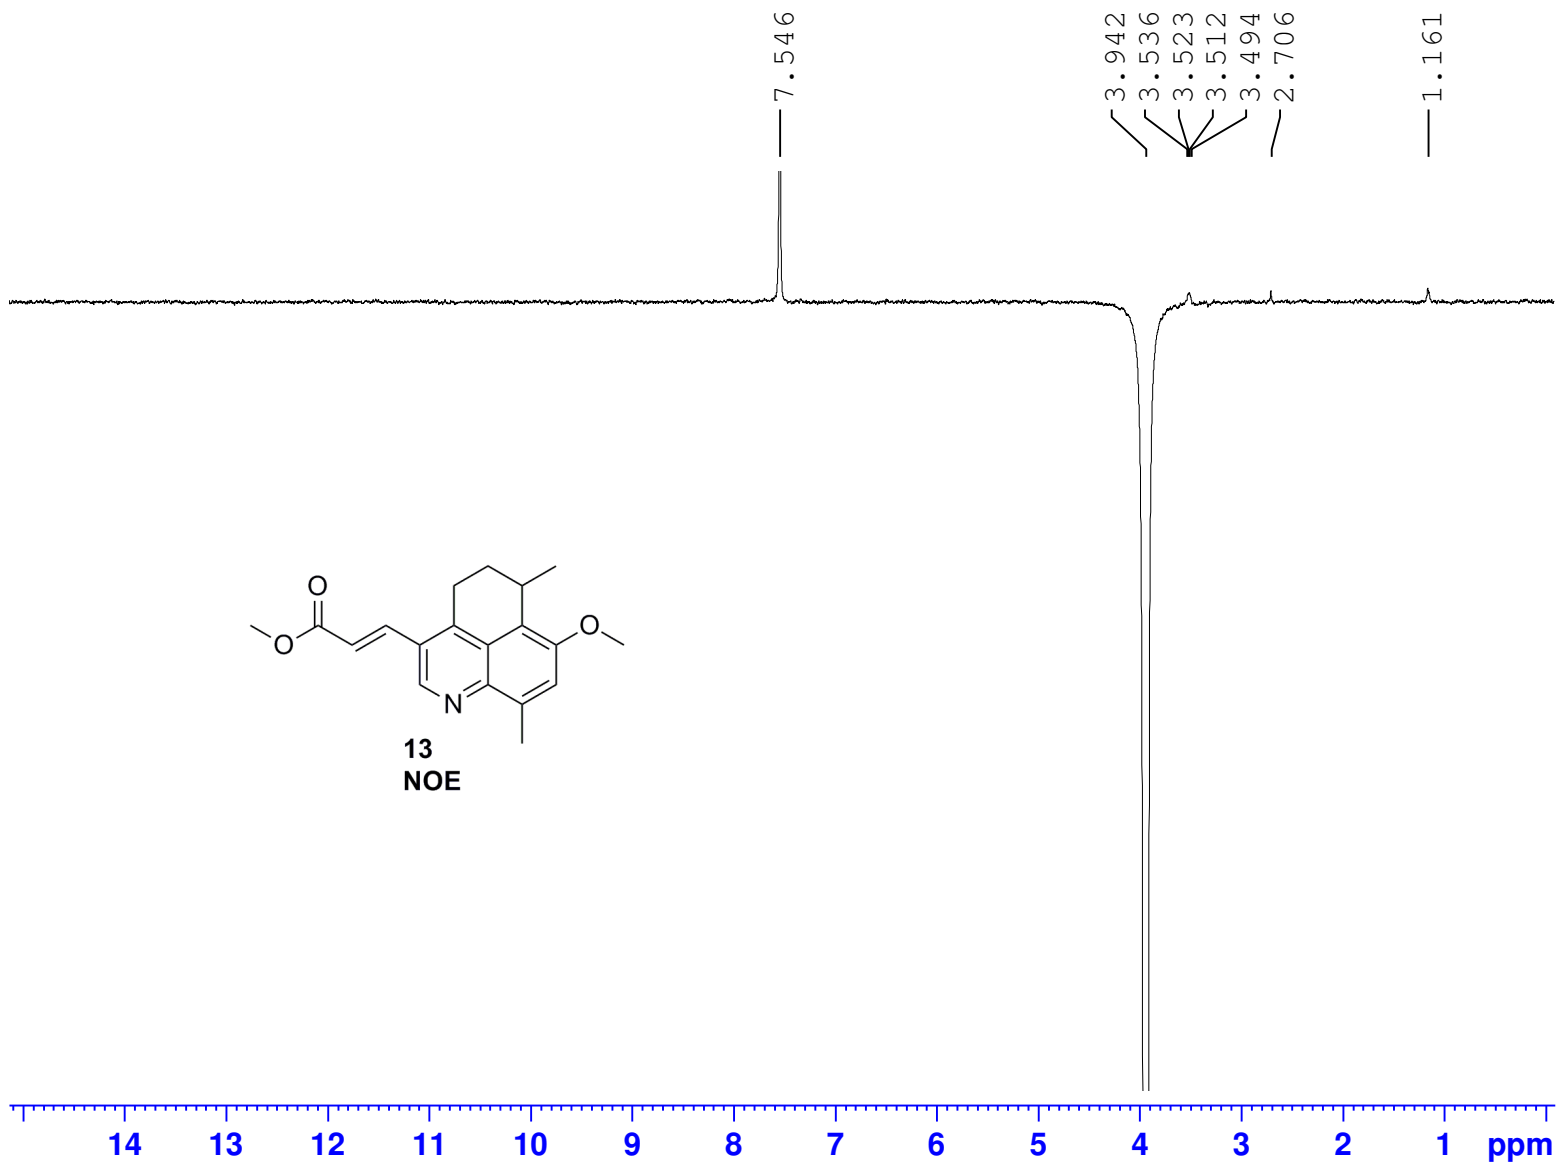

```

Current Data Parameters
NAME      511903B6921
EXPNO     4
PROCNO    1

F2 - Acquisition Parameters
Date_     20190319
Time      13.49 h
INSTRUM   spect
PROBHD    z119470_0294 (
PULPROG   selrogp
TD         65536
SOLVENT   DMSO
NS         64
DS         4
SWH        10000.000 Hz
FIDRES     0.152588 Hz
AQ         3.2767999 sec
RG         197.72
DW         50.000 usec
DE         6.50 usec
TE         298.2 K
D1         2.00000000 sec
D16        0.00020000 sec
TD0        1
ZGOPTINS
SFO1      500.1330883 MHz
NUC1       1H
P1         10.00 usec
P12        80000.00 usec
P15        200000.00 usec
PLW0       0 W
PLW1       20.38699913 W
PLW11      0.16848999 W
SPNAM[2]   Gaus1_180r.1000
SPOAL2     0.500
SPOFFS2    -1114.96 Hz
SPW2       0.00000752 W
GPNAM[1]   SMSQ10.100
GPZ1       15.00 %
P16        1000.00 usec

F2 - Processing parameters
SI         32768
SF         500.1300026 MHz
WDW        EM
SSB        0
LB         2.00 Hz
GB         0
PC         1.00
    
```

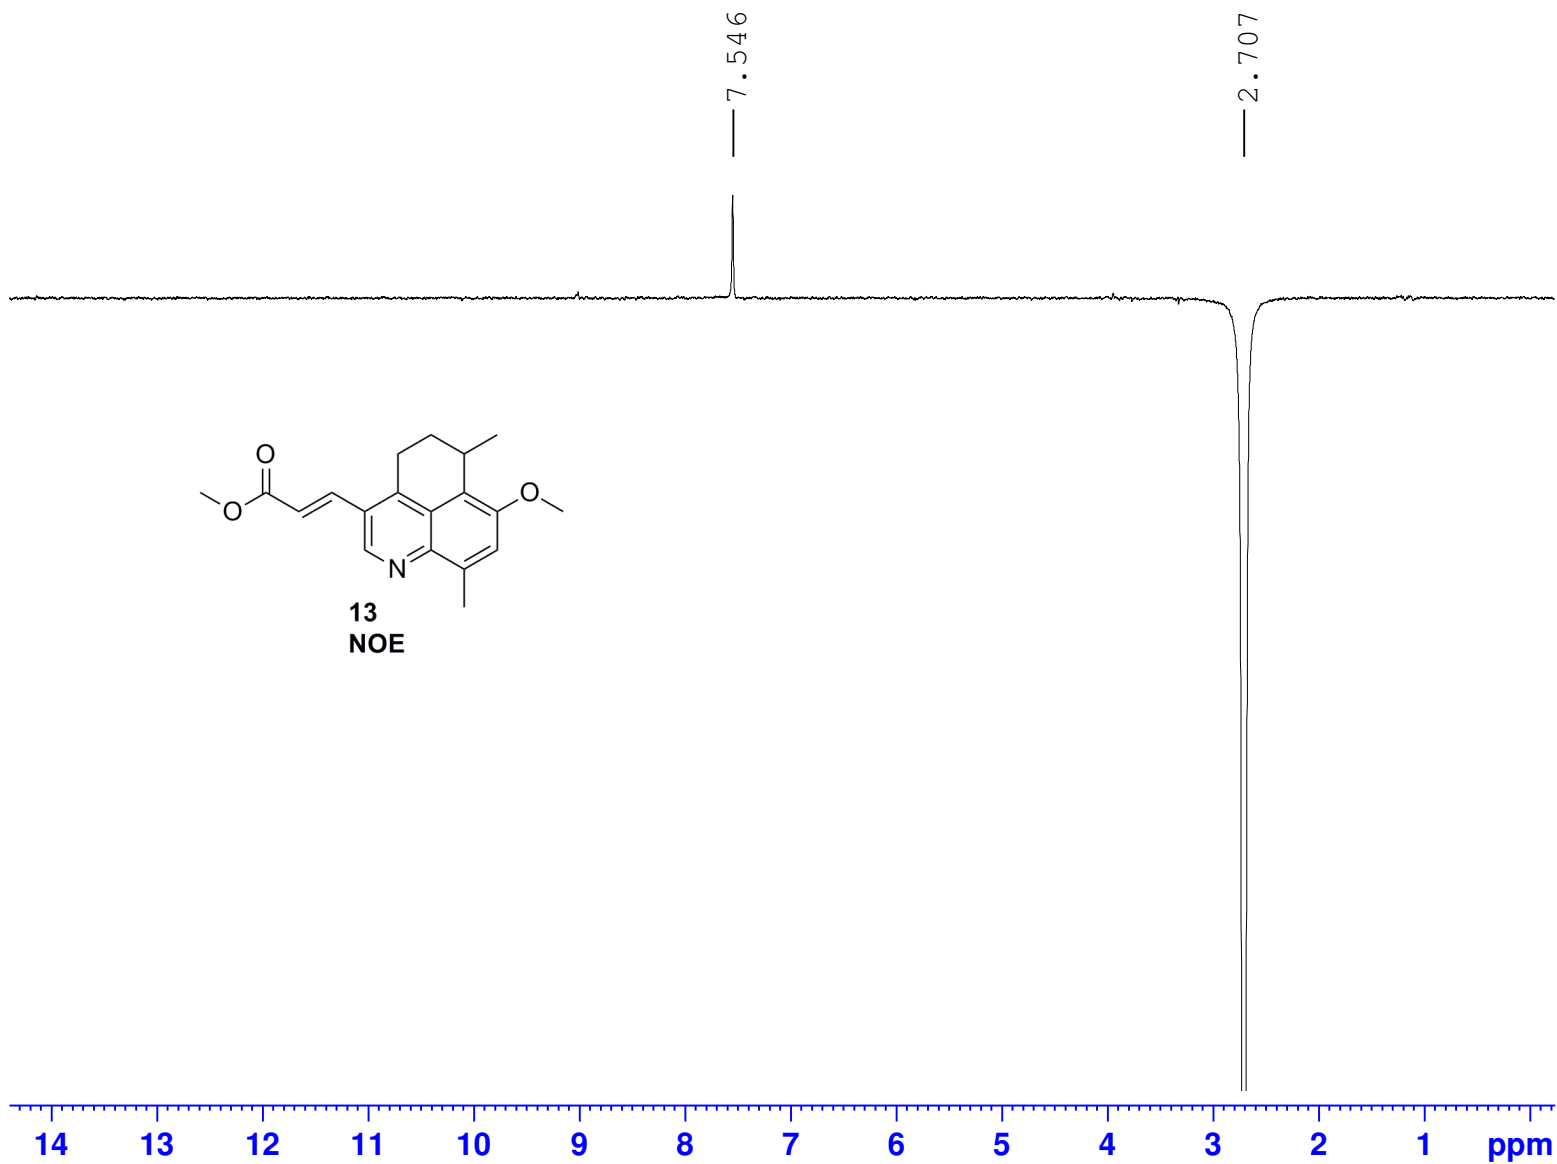

```

Current Data Parameters
NAME          511903B6921
EXPNO         7
PROCNO        1

F2 - Acquisition Parameters
Date_         20190319
Time          13.59 h
INSTRUM       spect
PROBHD        Z119470_0294 (
PULPROG       selrogp
TD            65536
SOLVENT       DMSO
NS            64
DS            4
SWH           10000.000 Hz
FIDRES        0.152588 Hz
AQ            3.2767999 sec
RG            197.72
DW            50.000 usec
DE            6.50 usec
TE            298.1 K
D1            2.00000000 sec
D16           0.00020000 sec
TD0           1
ZGOPTNS
SFO1          500.1330883 MHz
NUC1          1H
P1            10.00 usec
P12           80000.00 usec
P15           200000.00 usec
PLW0          0 W
PLW1          20.38699913 W
PLW11         0.16848999 W
SPNAM[2]      Gaus1_180r.1000
SPOAL2        0.500
SPOFFS2       -1732.48 Hz
SPW2          0.00000752 W
GPNAM[1]      SMSQ10.100
GPZ1          15.00 %
P16           1000.00 usec

F2 - Processing parameters
SI            32768
SF            500.1300026 MHz
WDW           EM
SSB           0
LB            2.00 Hz
GB            0
PC            1.00
    
```

TP-MA-1158-17

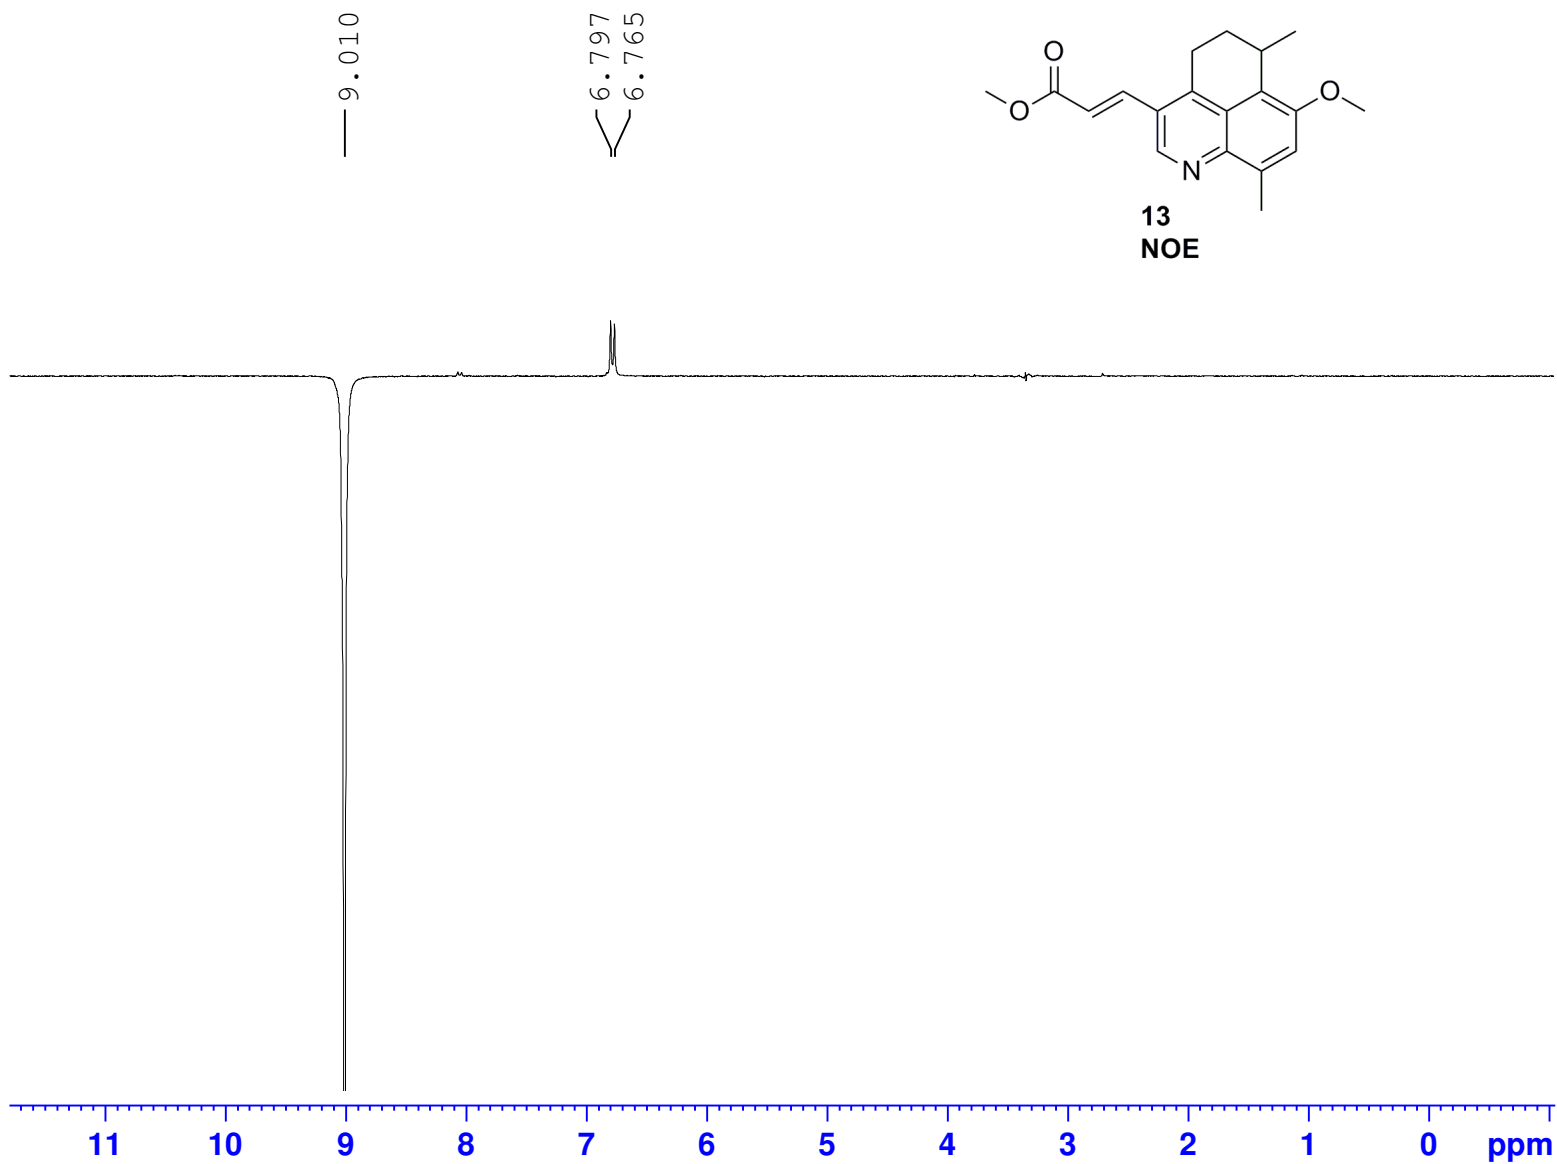

Current Data Parameters  
NAME 511903B6921  
EXPNO 8  
PROCNO 1

F2 - Acquisition Parameters  
Date\_ 20190319  
Time 17.39 h  
INSTRUM spect  
PROBHD z119470\_0294 (  
PULPROG selrogp  
TD 65536  
SOLVENT DMSO  
NS 64  
DS 4  
SWH 10000.000 Hz  
FIDRES 0.152588 Hz  
AQ 3.2767999 sec  
RG 197.72  
DW 50.000 usec  
DE 6.50 usec  
TE 298.1 K  
D1 2.0000000 sec  
D16 0.0002000 sec  
TD0 1  
ZGPTNS -DCALC\_SPOFFS  
SFO1 500.1330883 MHz  
NUC1 1H  
CNST21 9.0147018  
P1 10.00 usec  
P12 25921.06 usec  
P15 200000.00 usec  
PLW0 0 W  
PLW1 20.38699913 W  
PLW11 0.16848999 W  
SPNAM[2] Gaus1\_180r.1000  
SPOAL2 0.500  
spoffs2 1420.22 Hz  
SPW2 0.00007069 W  
GPNAM[1] SMSQ10.100  
GPZ1 15.00 %  
P16 1000.00 usec

F2 - Processing parameters  
SI 32768  
SF 500.1300018 MHz  
WDW EM  
SSB 0  
LB 2.00 Hz  
GB 0  
PC 1.00

8.587  
7.283  
7.262  
3.956  
3.692  
3.679  
3.619  
3.615  
3.605  
3.596  
3.592  
3.143  
3.127  
3.111  
3.045  
3.040  
3.035  
3.029  
3.018  
3.002  
2.992  
2.783  
2.693  
2.677  
2.661  
2.656  
2.645  
2.639  
2.623  
2.607  
2.039  
2.034  
2.029  
2.017  
2.013  
2.008  
2.004  
1.971  
1.955  
1.945  
1.935  
1.255  
1.222  
1.208  
-0.000

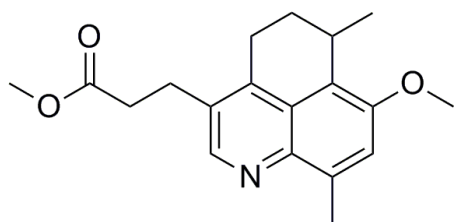

14

1H NMR 500 MHz, CDCl<sub>3</sub>

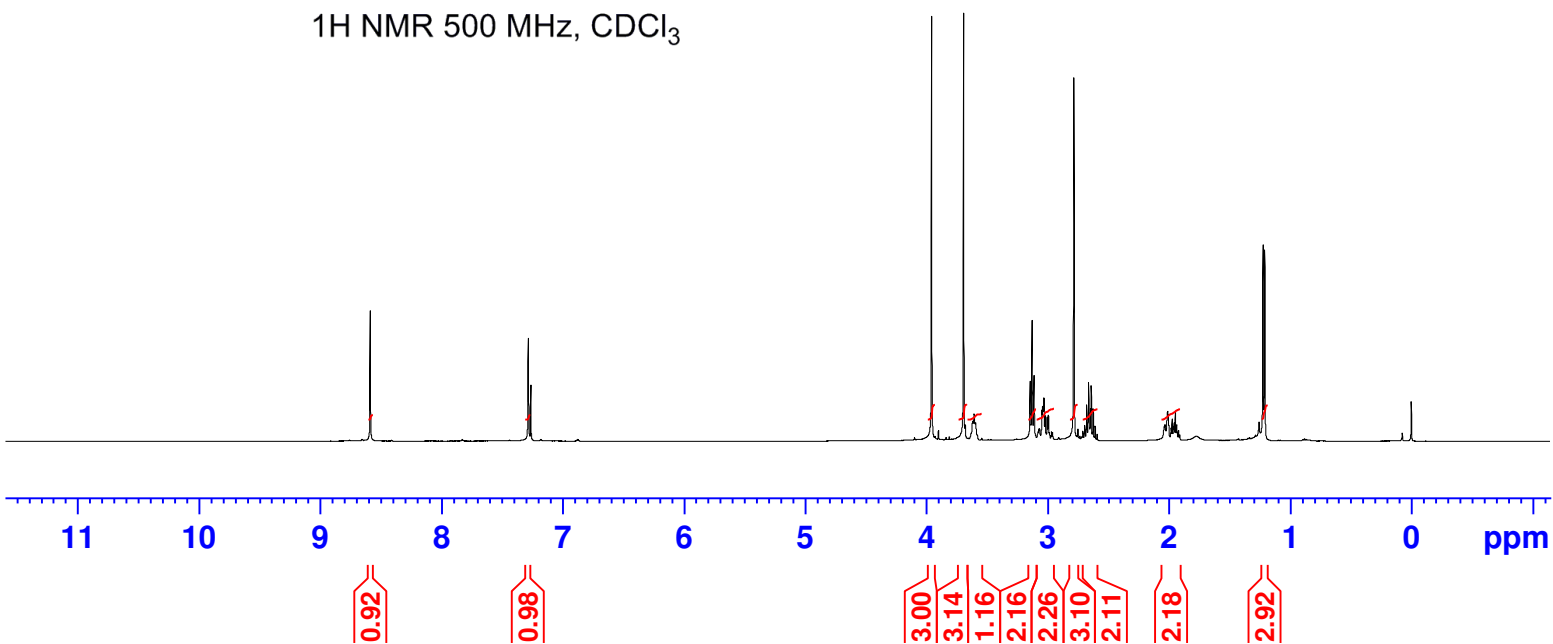

Current Data Parameters  
NAME 511903C5249  
EXPNO 1  
PROCNO 1

F2 - Acquisition Parameters  
Date\_ 20190327  
Time 22.12 h  
INSTRUM spect  
PROBHD z119470\_0294 (  
PULPROG zg30  
TD 65536  
SOLVENT CDCl3  
NS 8  
DS 0  
SWH 10000.000 Hz  
FIDRES 0.152588 Hz  
AQ 3.2767999 sec  
RG 79.68  
DW 50.000 usec  
DE 6.50 usec  
TE 298.2 K  
D1 1.00000000 sec  
TD0 1  
SFO1 500.1330885 MHz  
NUC1 1H  
P1 10.00 usec  
PLW1 20.38699913 W

F2 - Processing parameters  
SI 65536  
SF 500.1300113 MHz  
WDW EM  
SSB 0  
LB 0.50 Hz  
GB 0  
PC 1.00

TP-MA-1158-19

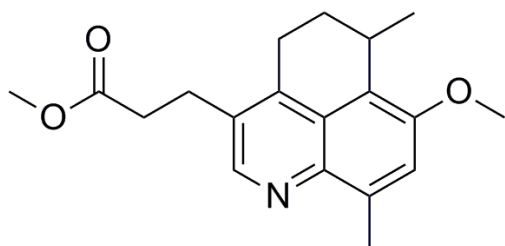

**14**

<sup>13</sup>C NMR 125 MHz, CDCl<sub>3</sub>

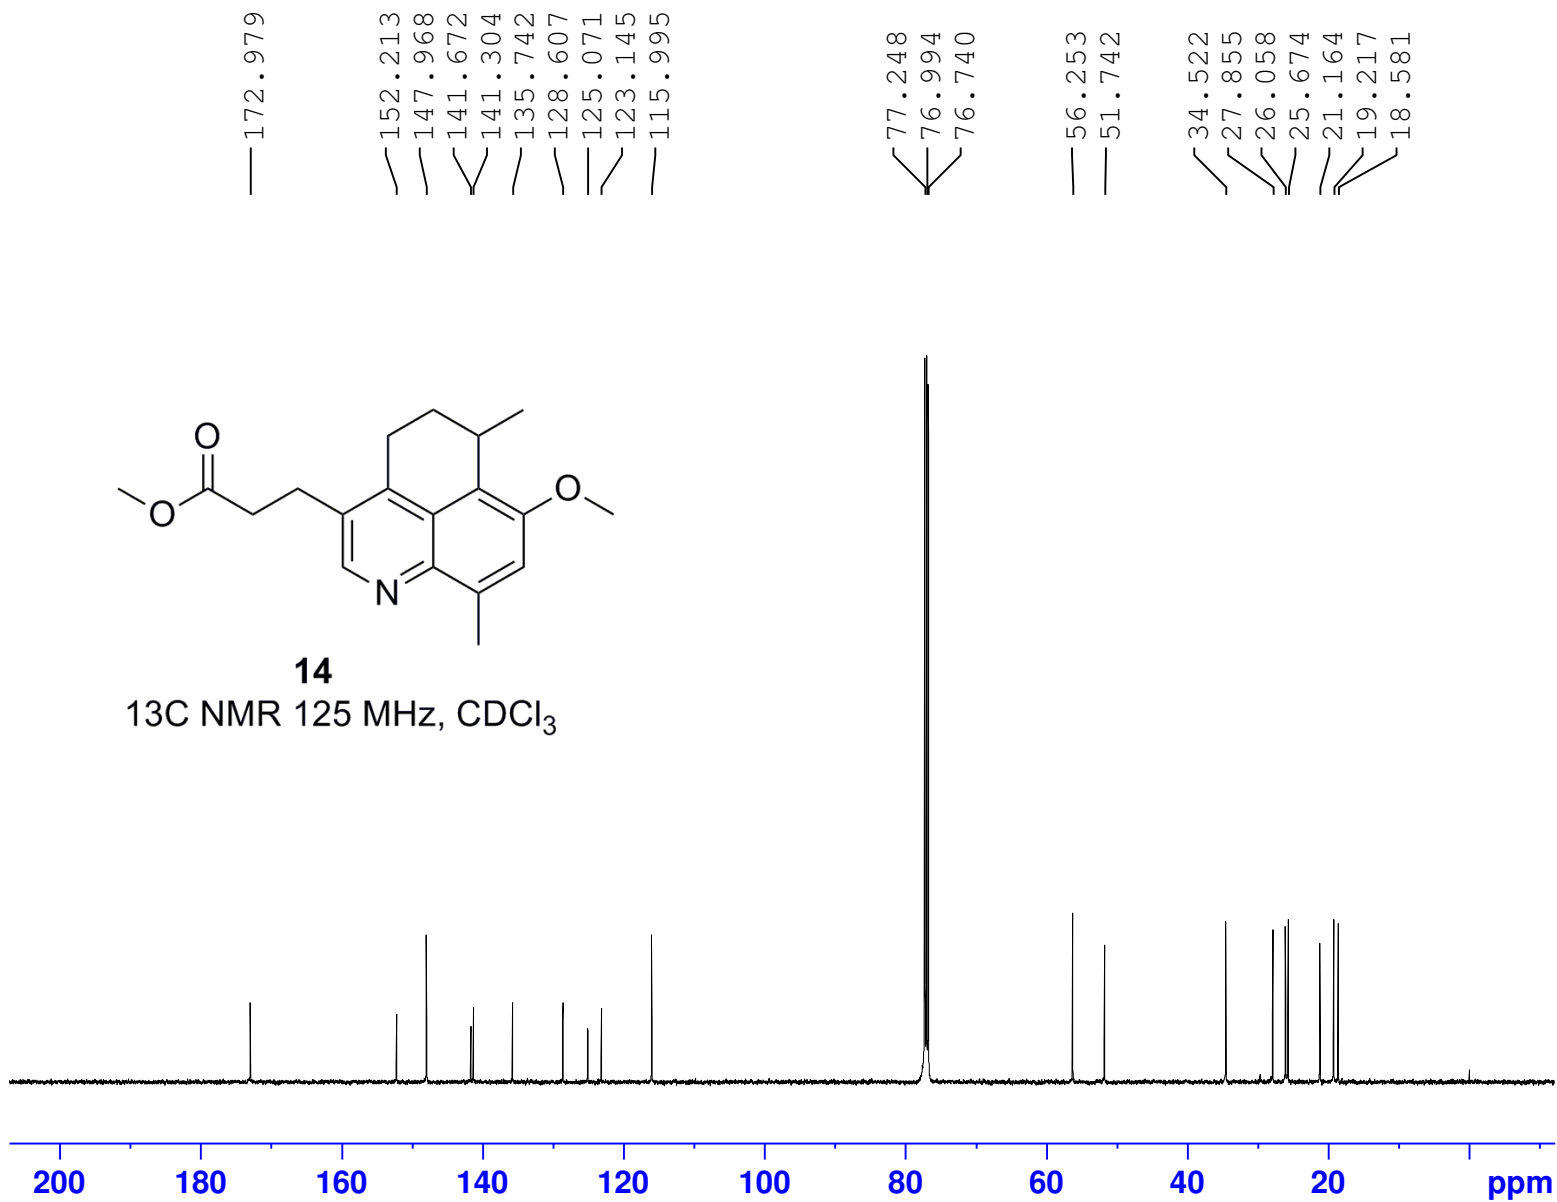

Current Data Parameters  
NAME 511903C5249  
EXPNO 2  
PROCNO 1

F2 - Acquisition Parameters  
Date\_ 20190327  
Time 23.25 h  
INSTRUM spect  
PROBHD z119470\_0294 (  
PULPROG zgpg30  
TD 65536  
SOLVENT CDCl3  
NS 1024  
DS 4  
SWH 29761.904 Hz  
FIDRES 0.454131 Hz  
AQ 1.1010048 sec  
RG 197.72  
DW 16.800 usec  
DE 6.50 usec  
TE 298.1 K  
D1 3.00000000 sec  
D11 0.03000000 sec  
TD0 1  
SFO1 125.7703643 MHz  
NUC1 13C  
P1 10.00 usec  
PLW1 79.88800049 W  
SFO2 500.1320005 MHz  
NUC2 1H  
CPDPRG[2] waltz16  
PCPD2 90.00 usec  
PLW2 20.38699913 W  
PLW12 0.25169000 W  
PLW13 0.16023000 W

F2 - Processing parameters  
SI 32768  
SF 125.7577937 MHz  
WDW EM  
SSB 0  
LB 2.00 Hz  
GB 0  
PC 1.40

TP-MA-1158-20

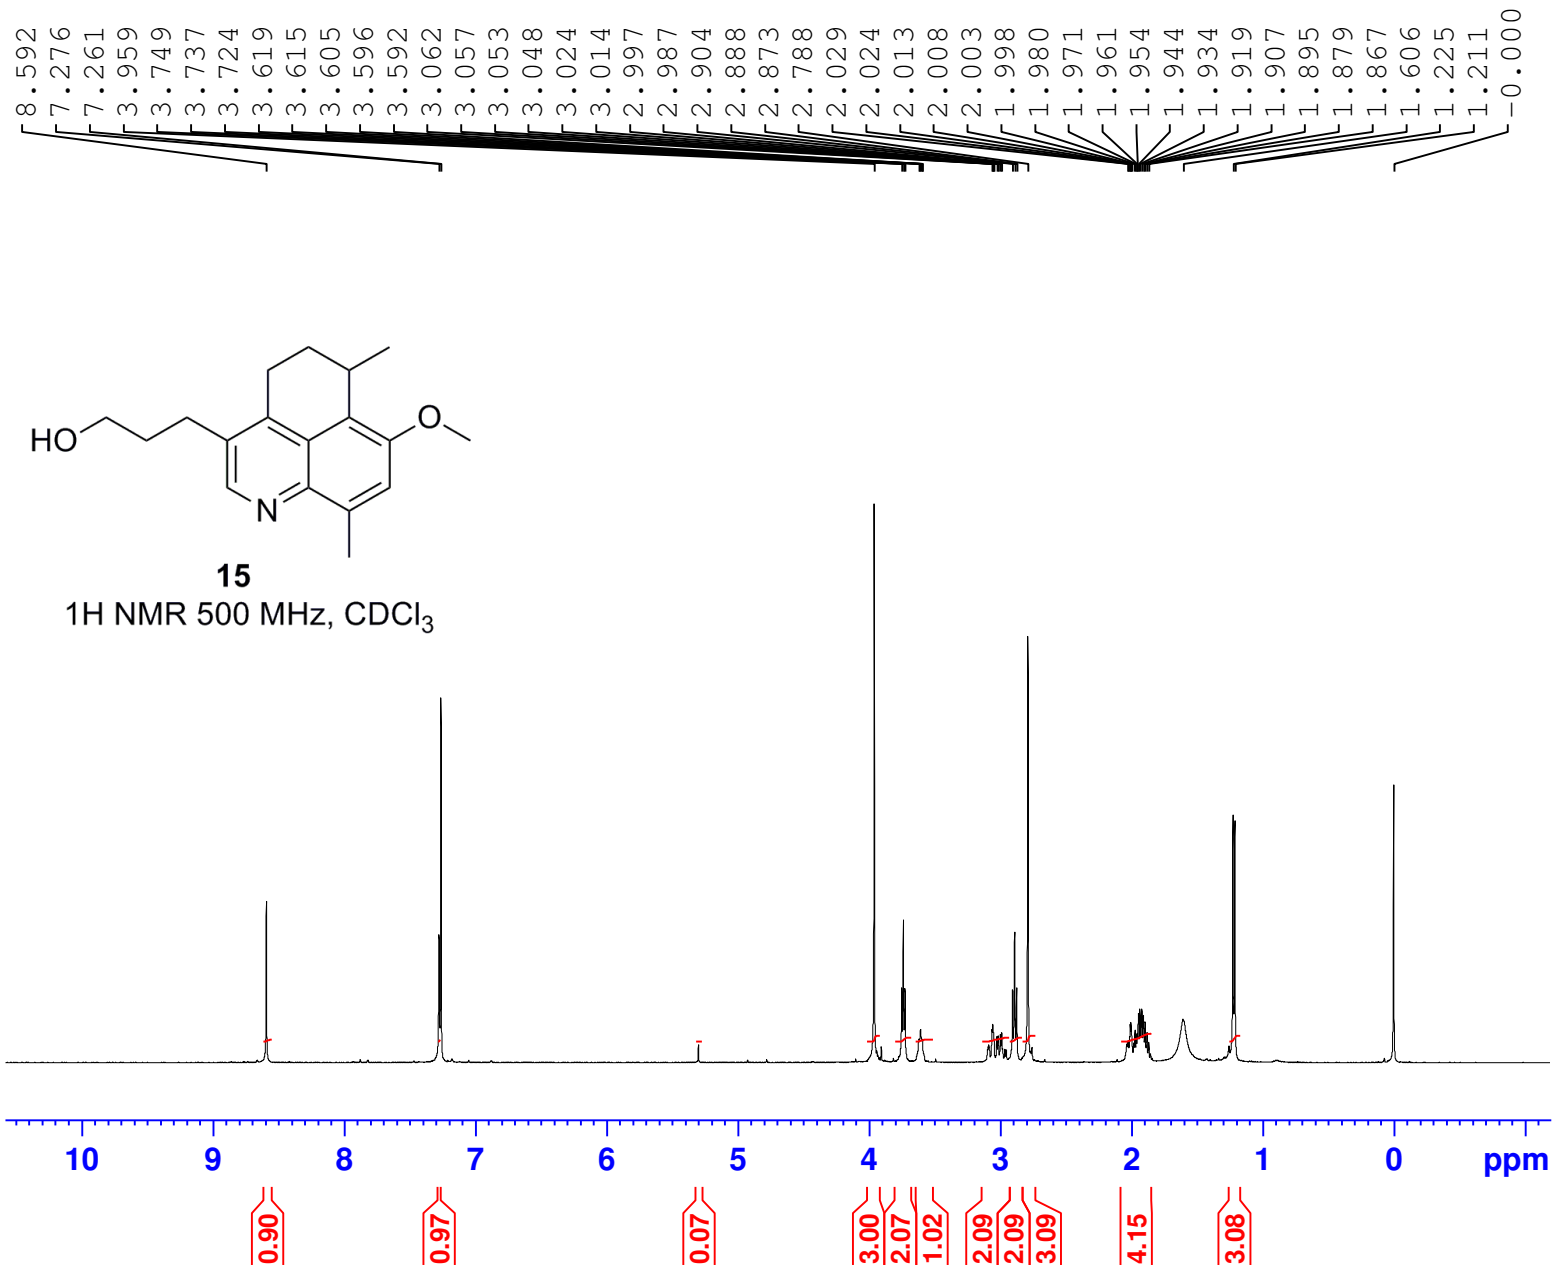

Current Data Parameters  
NAME 511903C7023  
EXPNO 1  
PROCNO 1

F2 - Acquisition Parameters  
Date\_ 20190329  
Time 7.24 h  
INSTRUM spect  
PROBHD z119470\_0294 (  
PULPROG zg30  
TD 65536  
SOLVENT CDCl3  
NS 8  
DS 0  
SWH 10000.000 Hz  
FIDRES 0.152588 Hz  
AQ 3.2767999 sec  
RG 132.94  
DW 50.000 usec  
DE 6.50 usec  
TE 298.2 K  
D1 1.00000000 sec  
TD0 1  
SFO1 500.1330885 MHz  
NUC1 1H  
P1 10.00 usec  
PLW1 20.38699913 W

F2 - Processing parameters  
SI 65536  
SF 500.1300121 MHz  
WDW EM  
SSB 0  
LB 0.30 Hz  
GB 0  
PC 1.00

TP-MA-1158-20

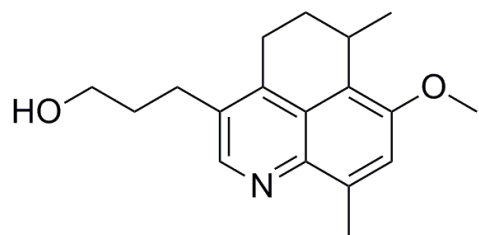

15

<sup>13</sup>C NMR 125 MHz, CDCl<sub>3</sub>

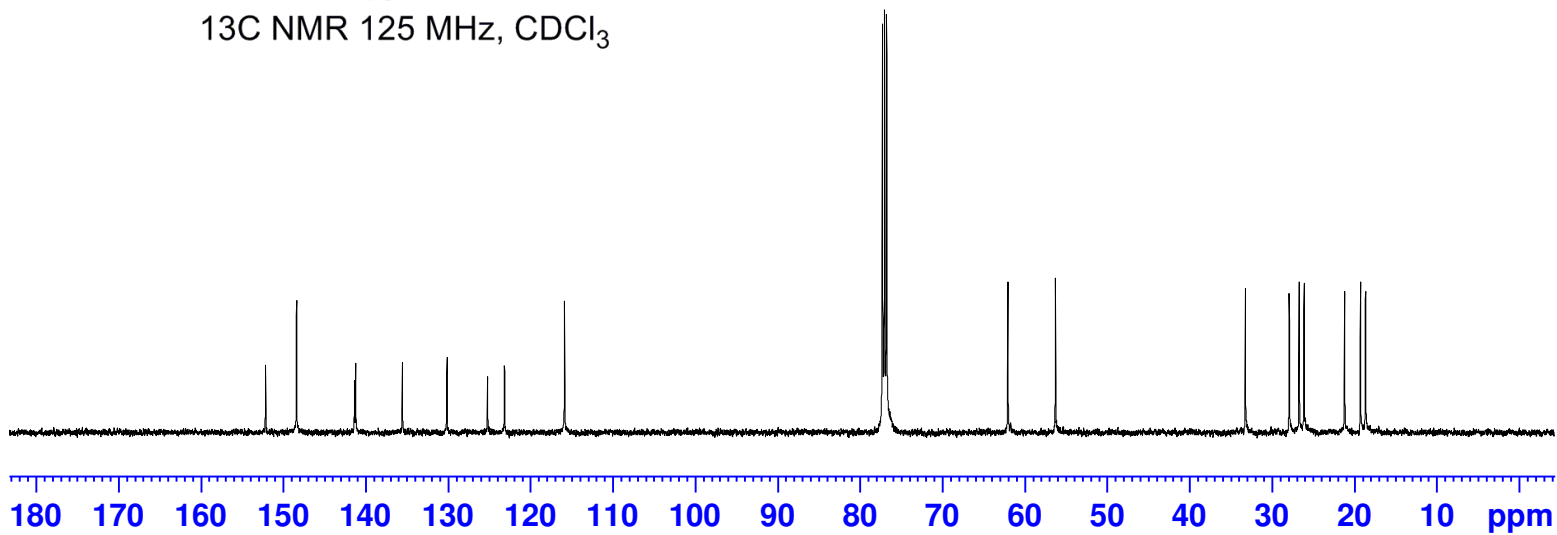

152.138  
148.376  
141.351  
141.193  
135.531  
130.115  
125.186  
123.129  
115.847

77.250  
76.996  
76.742  
62.021  
56.250

33.191  
27.864  
26.662  
26.065  
21.145  
19.218  
18.610

Current Data Parameters  
NAME 511903C5252  
EXPNO 2  
PROCNO 1

F2 - Acquisition Parameters  
Date\_ 20190327  
Time 20.47 h  
INSTRUM spect  
PROBHD z119470\_0294 (  
PULPROG zgpg30  
TD 65536  
SOLVENT CDCl3  
NS 484  
DS 4  
SWH 29761.904 Hz  
FIDRES 0.454131 Hz  
AQ 1.1010048 sec  
RG 197.72  
DW 16.800 usec  
DE 6.50 usec  
TE 298.2 K  
D1 3.0000000 sec  
D11 0.0300000 sec  
TD0 1  
SFO1 125.7703643 MHz  
NUC1 13C  
P1 10.00 usec  
PLW1 79.8880049 W  
SFO2 500.1320005 MHz  
NUC2 1H  
CPDPRG[2] waltz16  
PCPD2 90.00 usec  
PLW2 20.38699913 W  
PLW12 0.25169000 W  
PLW13 0.16023000 W

F2 - Processing parameters  
SI 32768  
SF 125.7577967 MHz  
WDW EM  
SSB 0  
LB 2.00 Hz  
GB 0  
PC 1.40

TP-MA-1158-22

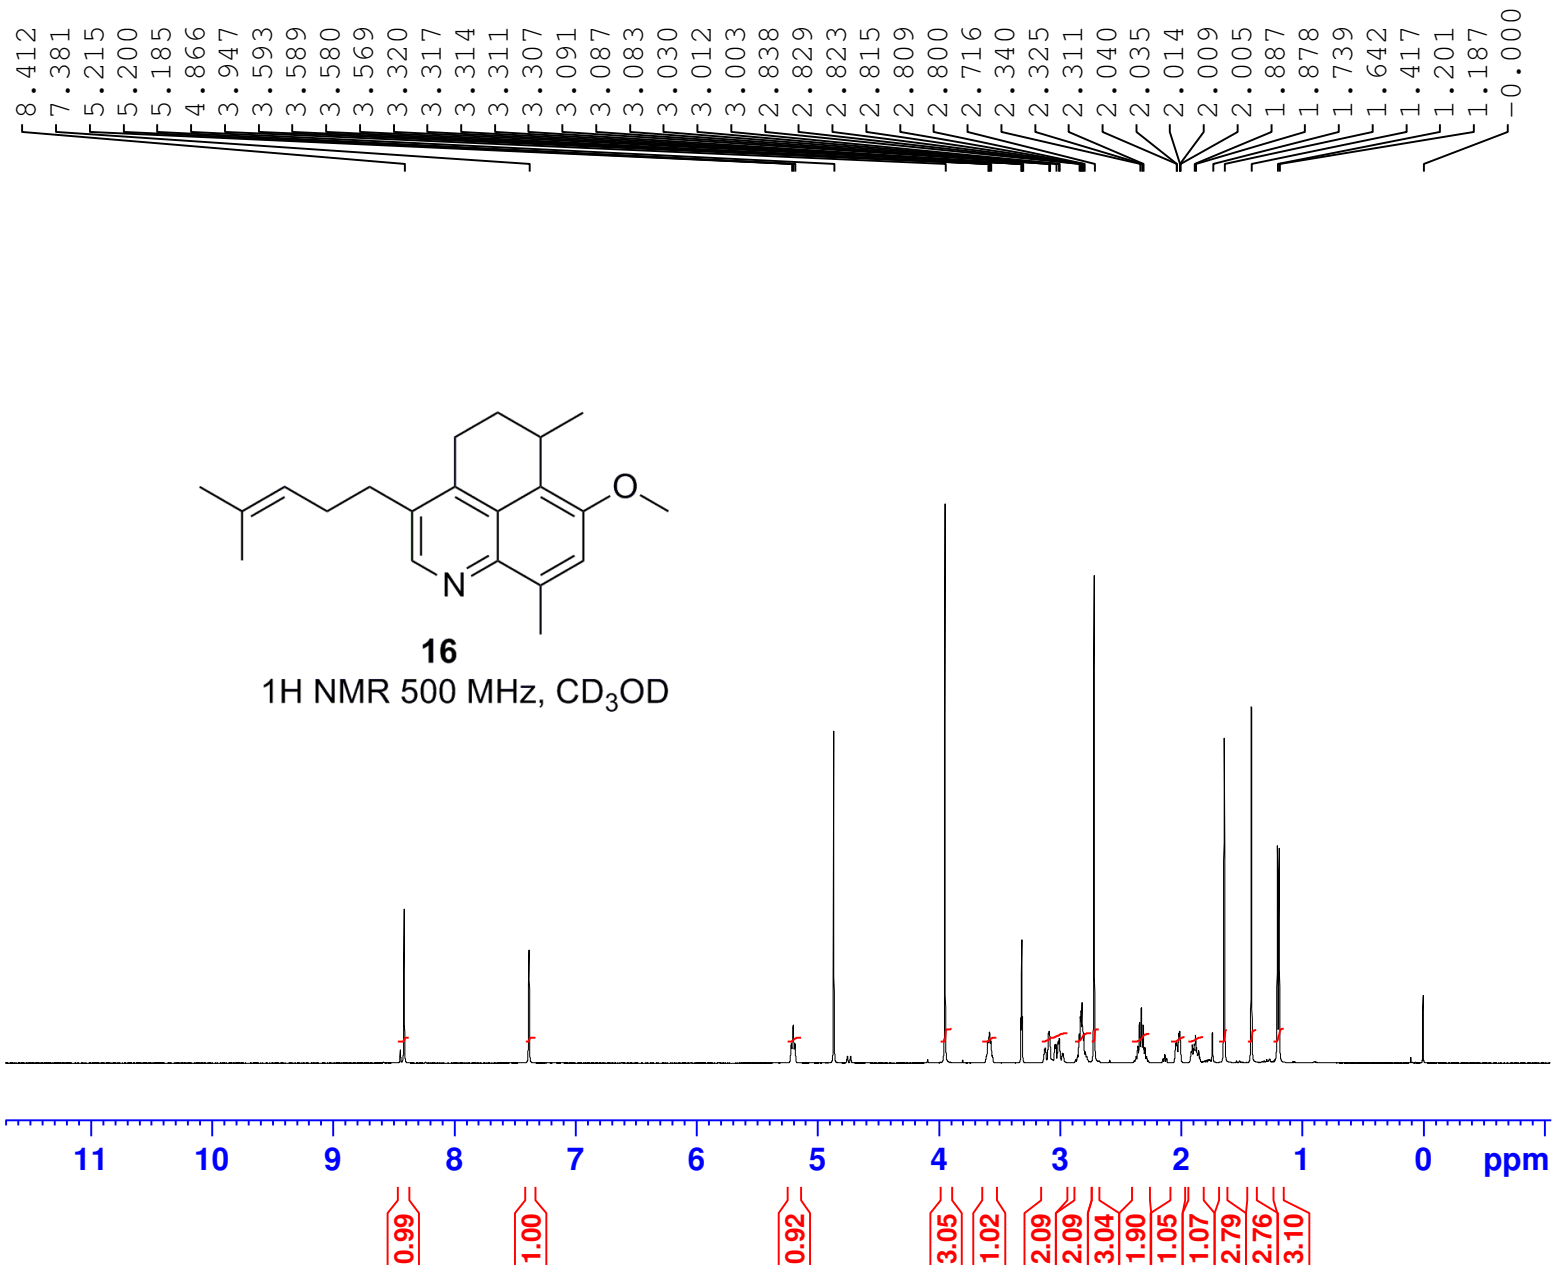

Current Data Parameters  
NAME 511903C3907  
EXPNO 1  
PROCNO 1

F2 - Acquisition Parameters  
Date\_ 20190327  
Time 17.45 h  
INSTRUM spect  
PROBHD z119470\_0294 (  
PULPROG zg30  
TD 65536  
SOLVENT MeOD  
NS 8  
DS 0  
SWH 10000.000 Hz  
FIDRES 0.152588 Hz  
AQ 3.2767999 sec  
RG 69.27  
DW 50.000 usec  
DE 6.50 usec  
TE 298.1 K  
D1 1.00000000 sec  
TD0 1  
SFO1 500.1330885 MHz  
NUC1 1H  
P1 10.00 usec  
PLW1 20.38699913 W

F2 - Processing parameters  
SI 65536  
SF 500.1300079 MHz  
WDW EM  
SSB 0  
LB 0.30 Hz  
GB 0  
PC 1.00



TP-MA-1158-22

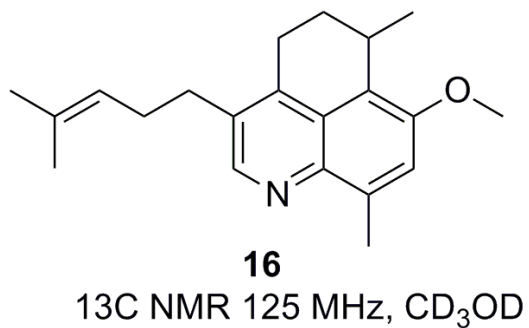

153.806  
149.383  
143.363  
141.951  
136.139  
133.741  
131.853  
126.508  
124.335  
124.198  
117.369

56.685  
49.507  
49.336  
49.167  
48.995  
48.826  
48.655  
48.485  
31.272  
29.840  
28.987  
27.386  
25.881  
22.310  
19.533  
18.871  
17.558

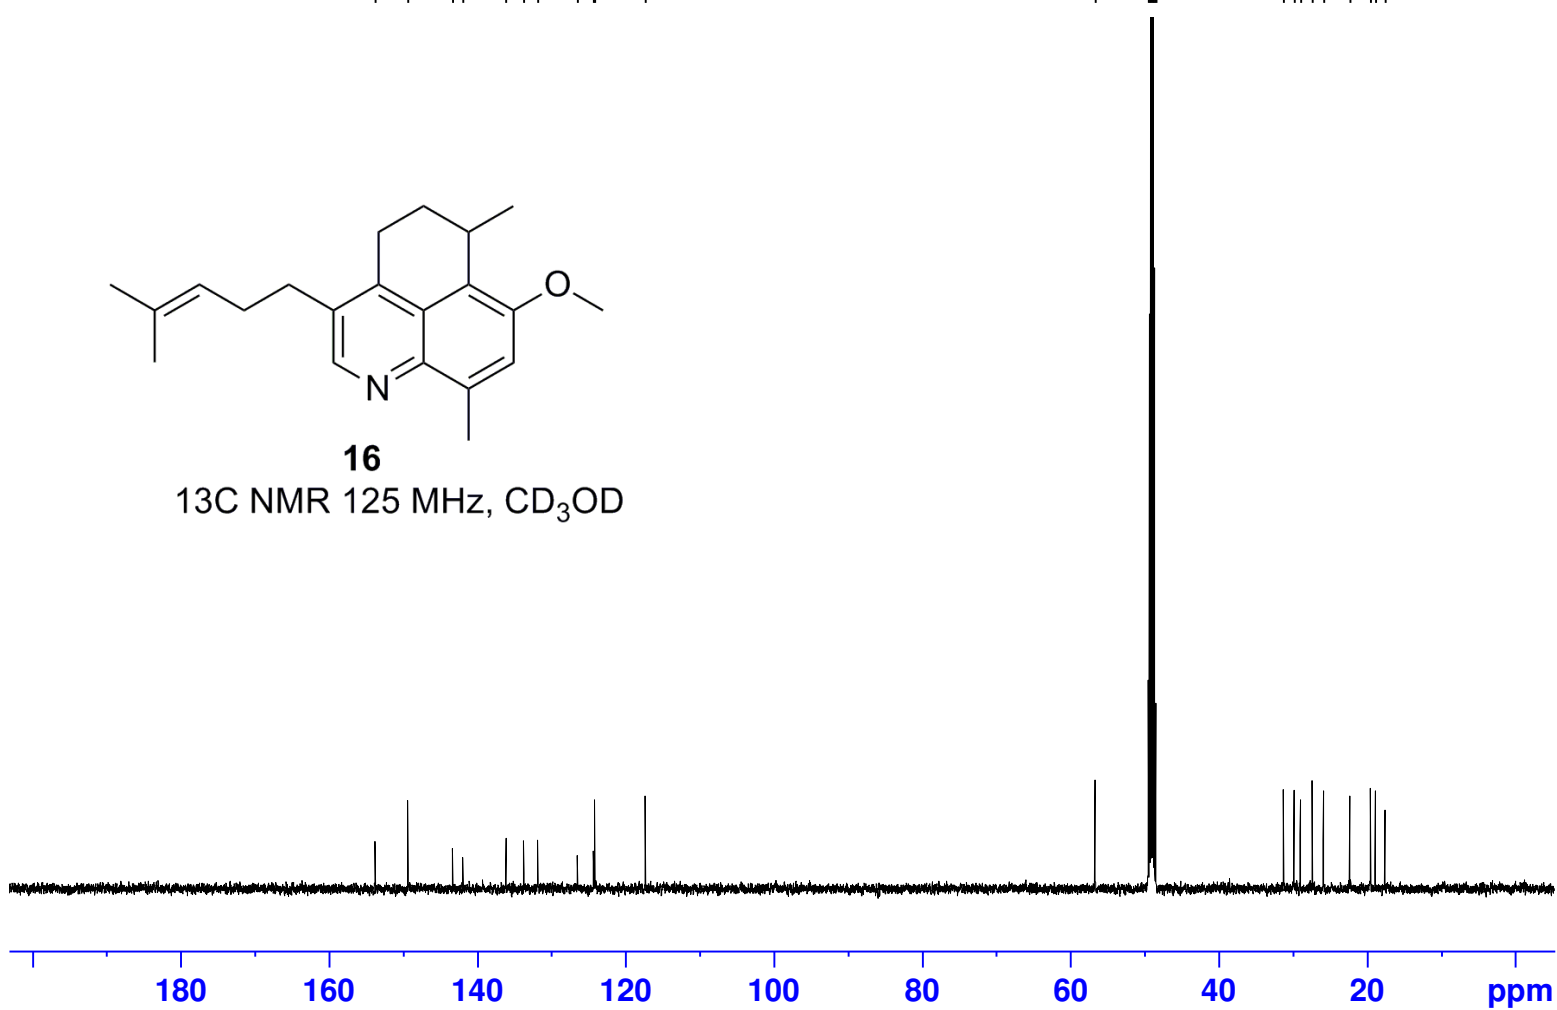

Current Data Parameters  
NAME 511903C3907  
EXPNO 2  
PROCNO 1

F2 - Acquisition Parameters  
Date\_ 20190327  
Time 17.50 h  
INSTRUM spect  
PROBHD z119470\_0294 (  
PULPROG zgpg30  
TD 65536  
SOLVENT MeOD  
NS 84  
DS 4  
SWH 29761.904 Hz  
FIDRES 0.454131 Hz  
AQ 1.1010048 sec  
RG 197.72  
DW 16.800 usec  
DE 6.50 usec  
TE 298.2 K  
D1 3.00000000 sec  
D11 0.03000000 sec  
TD0 1  
SFO1 125.7703643 MHz  
NUC1 13C  
P1 10.00 usec  
PLW1 79.88800049 W  
SFO2 500.1320005 MHz  
NUC2 1H  
PCPDPRG[2] waltz16  
PCPD2 90.00 usec  
PLW2 20.38699913 W  
PLW12 0.25169000 W  
PLW13 0.16023000 W

F2 - Processing parameters  
SI 32768  
SF 125.7576130 MHz  
WDW EM  
SSB 0  
LB 2.00 Hz  
GB 0  
PC 1.40

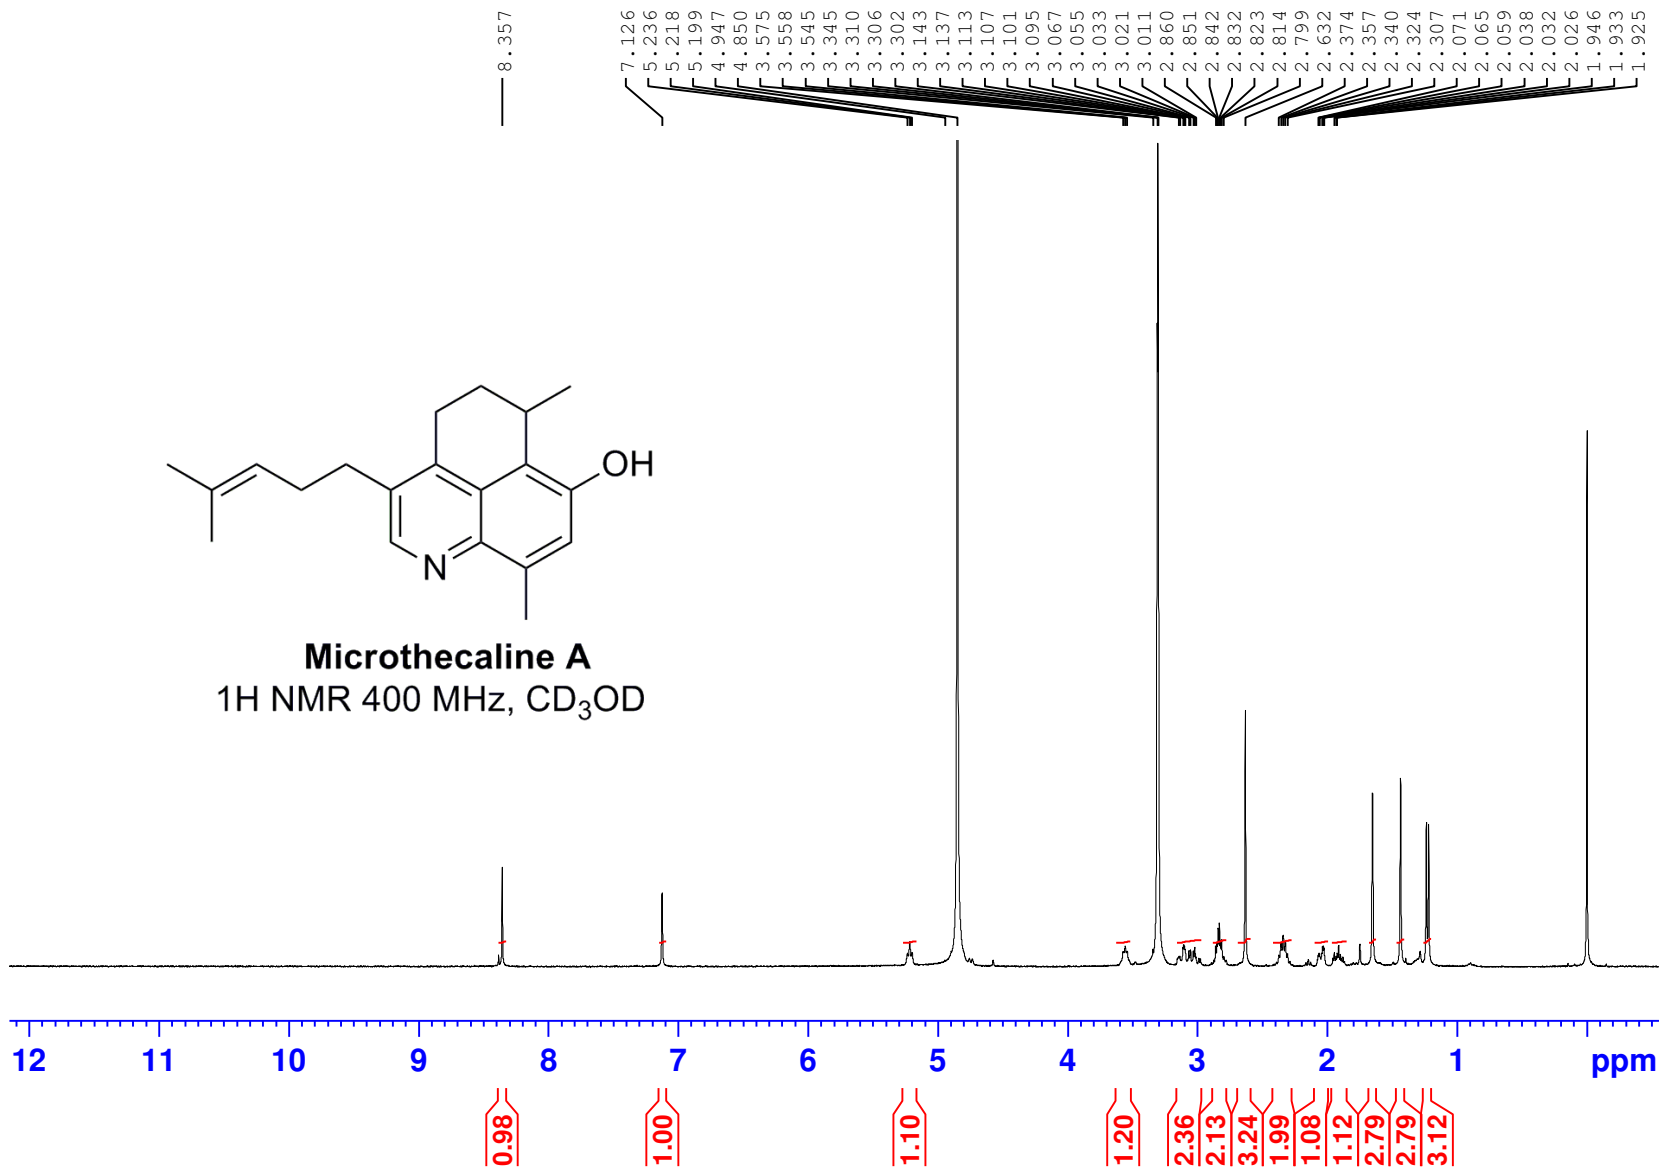

Current Data Parameters  
 NAME 511904A1427  
 EXPNO 1  
 PROCNO 1

F2 - Acquisition Parameters  
 Date\_ 20190402  
 Time 13.17  
 INSTRUM spect  
 PROBHD 5 mm PABBO BB/  
 PULPROG zg30  
 TD 65536  
 SOLVENT MeOD  
 NS 16  
 DS 2  
 SWH 8012.820 Hz  
 FIDRES 0.122266 Hz  
 AQ 4.0894465 sec  
 RG 110.59  
 DW 62.400 usec  
 DE 6.50 usec  
 TE 298.5 K  
 D1 1.00000000 sec  
 TD0 1

===== CHANNEL f1 =====  
 SFO1 400.1324710 MHz  
 NUC1 1H  
 P1 9.75 usec  
 PLW1 16.00000000 W

F2 - Processing parameters  
 SI 65536  
 SF 400.1300093 MHz  
 WDW EM  
 SSB 0  
 LB 0.30 Hz  
 GB 0  
 PC 1.00

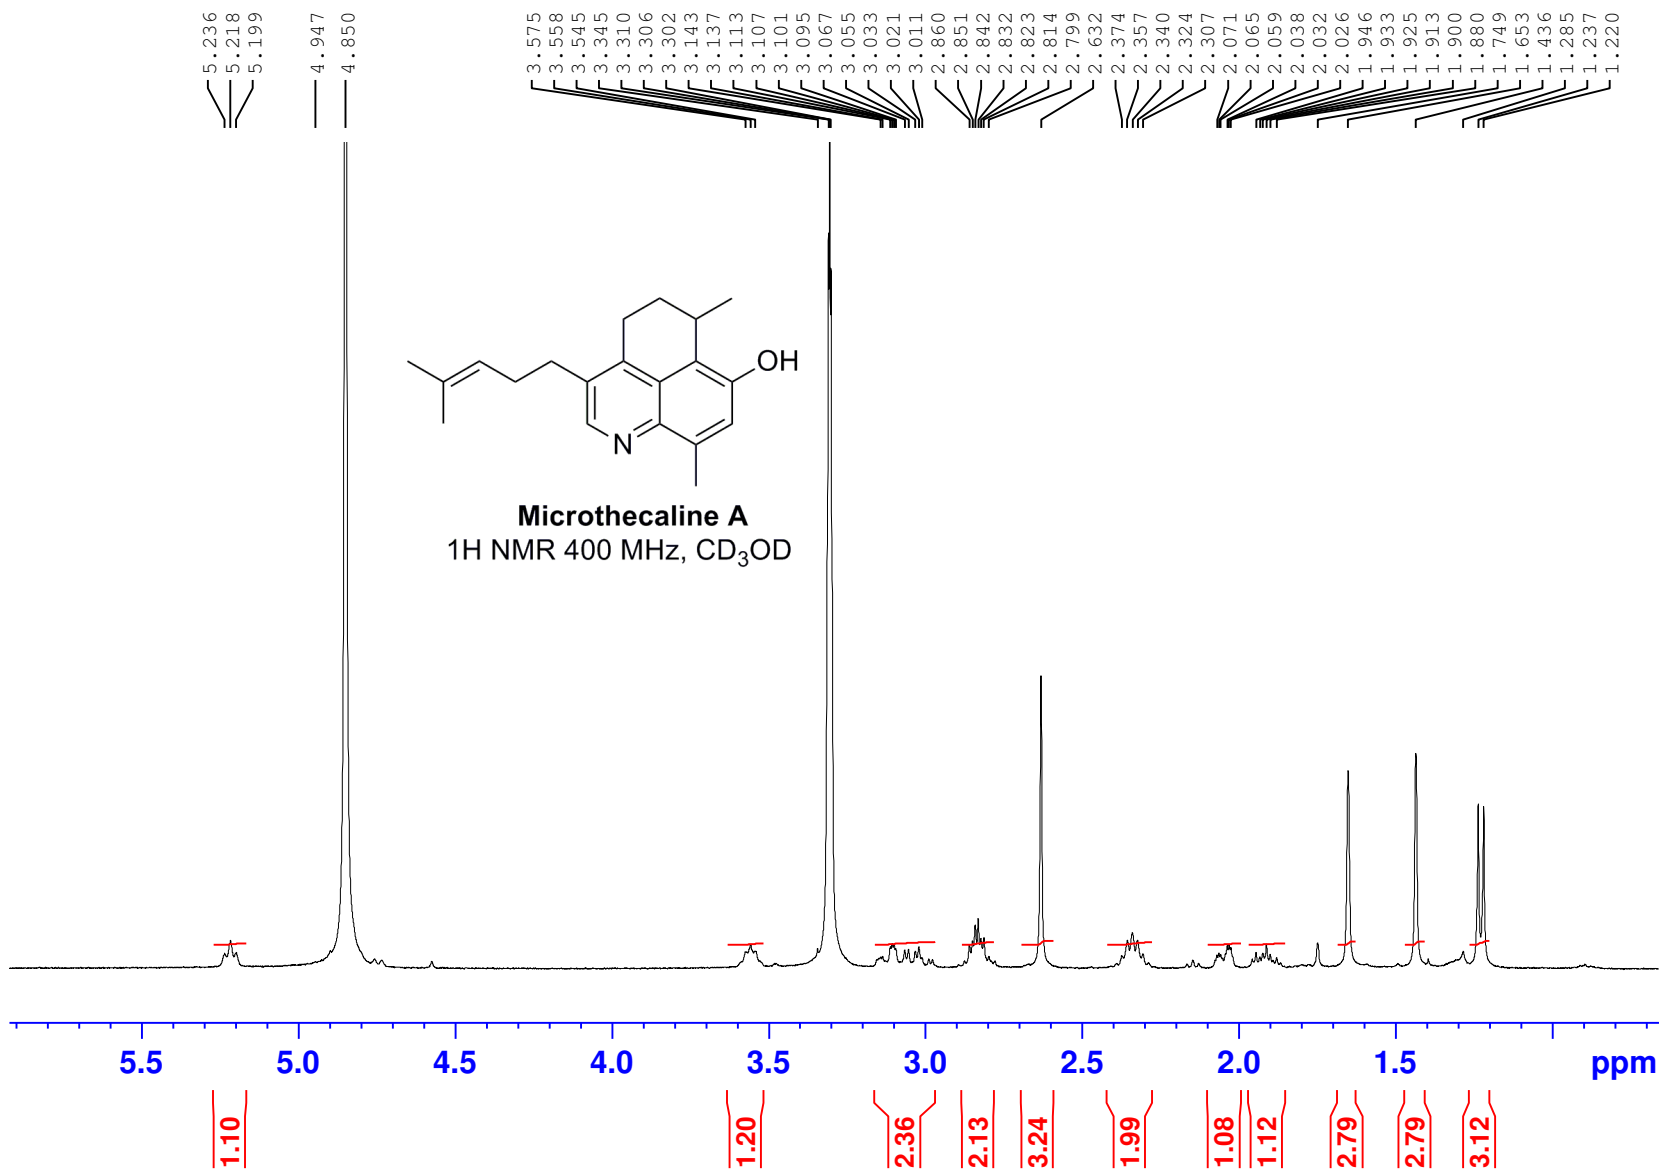

Current Data Parameters  
 NAME 511904A1427  
 EXPNO 1  
 PROCNO 1

F2 - Acquisition Parameters  
 Date\_ 20190402  
 Time 13.17  
 INSTRUM spect  
 PROBHD 5 mm PABBO BB/  
 PULPROG zg30  
 TD 65536  
 SOLVENT MeOD  
 NS 16  
 DS 2  
 SWH 8012.820 Hz  
 FIDRES 0.122266 Hz  
 AQ 4.0894465 sec  
 RG 110.59  
 DW 62.400 usec  
 DE 6.50 usec  
 TE 298.5 K  
 D1 1.00000000 sec  
 TD0 1

===== CHANNEL f1 =====  
 SFO1 400.1324710 MHz  
 NUC1 1H  
 P1 9.75 usec  
 PLW1 16.00000000 W

F2 - Processing parameters  
 SI 65536  
 SF 400.1300093 MHz  
 WDW EM  
 SSB 0  
 LB 0.30 Hz  
 GB 0  
 PC 1.00

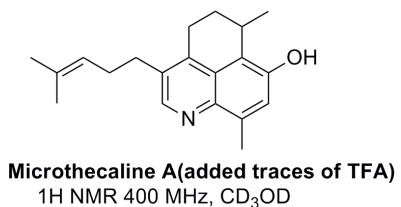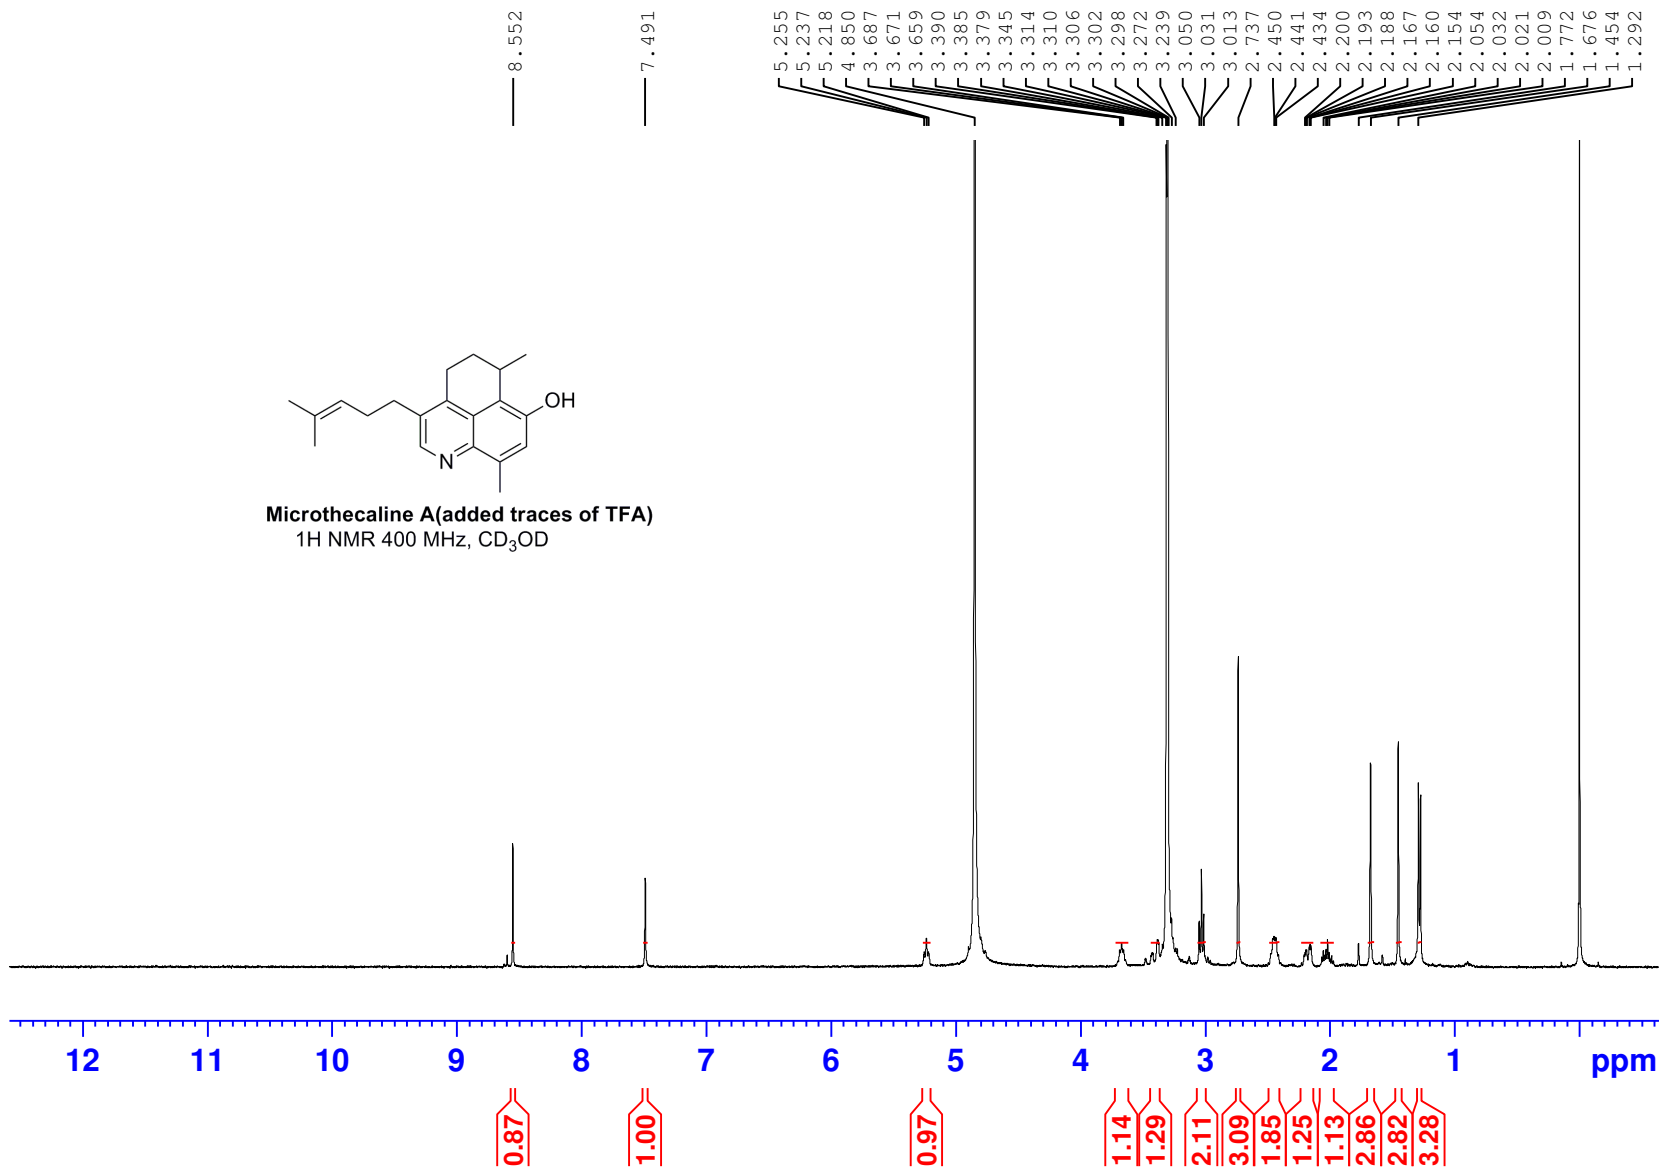

Current Data Parameters  
 NAME 511904A1428  
 EXPNO 1  
 PROCNO 1

F2 - Acquisition Parameters  
 Date\_ 20190402  
 Time 13.13  
 INSTRUM spect  
 PROBHD 5 mm PABBO BB/  
 PULPROG zg30  
 TD 65536  
 SOLVENT MeOD  
 NS 16  
 DS 2  
 SWH 8012.820 Hz  
 FIDRES 0.122266 Hz  
 AQ 4.0894465 sec  
 RG 195.29  
 DW 62.400 usec  
 DE 6.50 usec  
 TE 298.5 K  
 D1 1.00000000 sec  
 TD0 1

===== CHANNEL f1 =====  
 SFO1 400.1324710 MHz  
 NUC1 1H  
 P1 9.75 usec  
 PLW1 16.00000000 W

F2 - Processing parameters  
 SI 65536  
 SF 400.1300093 MHz  
 WDW EM  
 SSB 0  
 LB 0.30 Hz  
 GB 0  
 PC 1.00

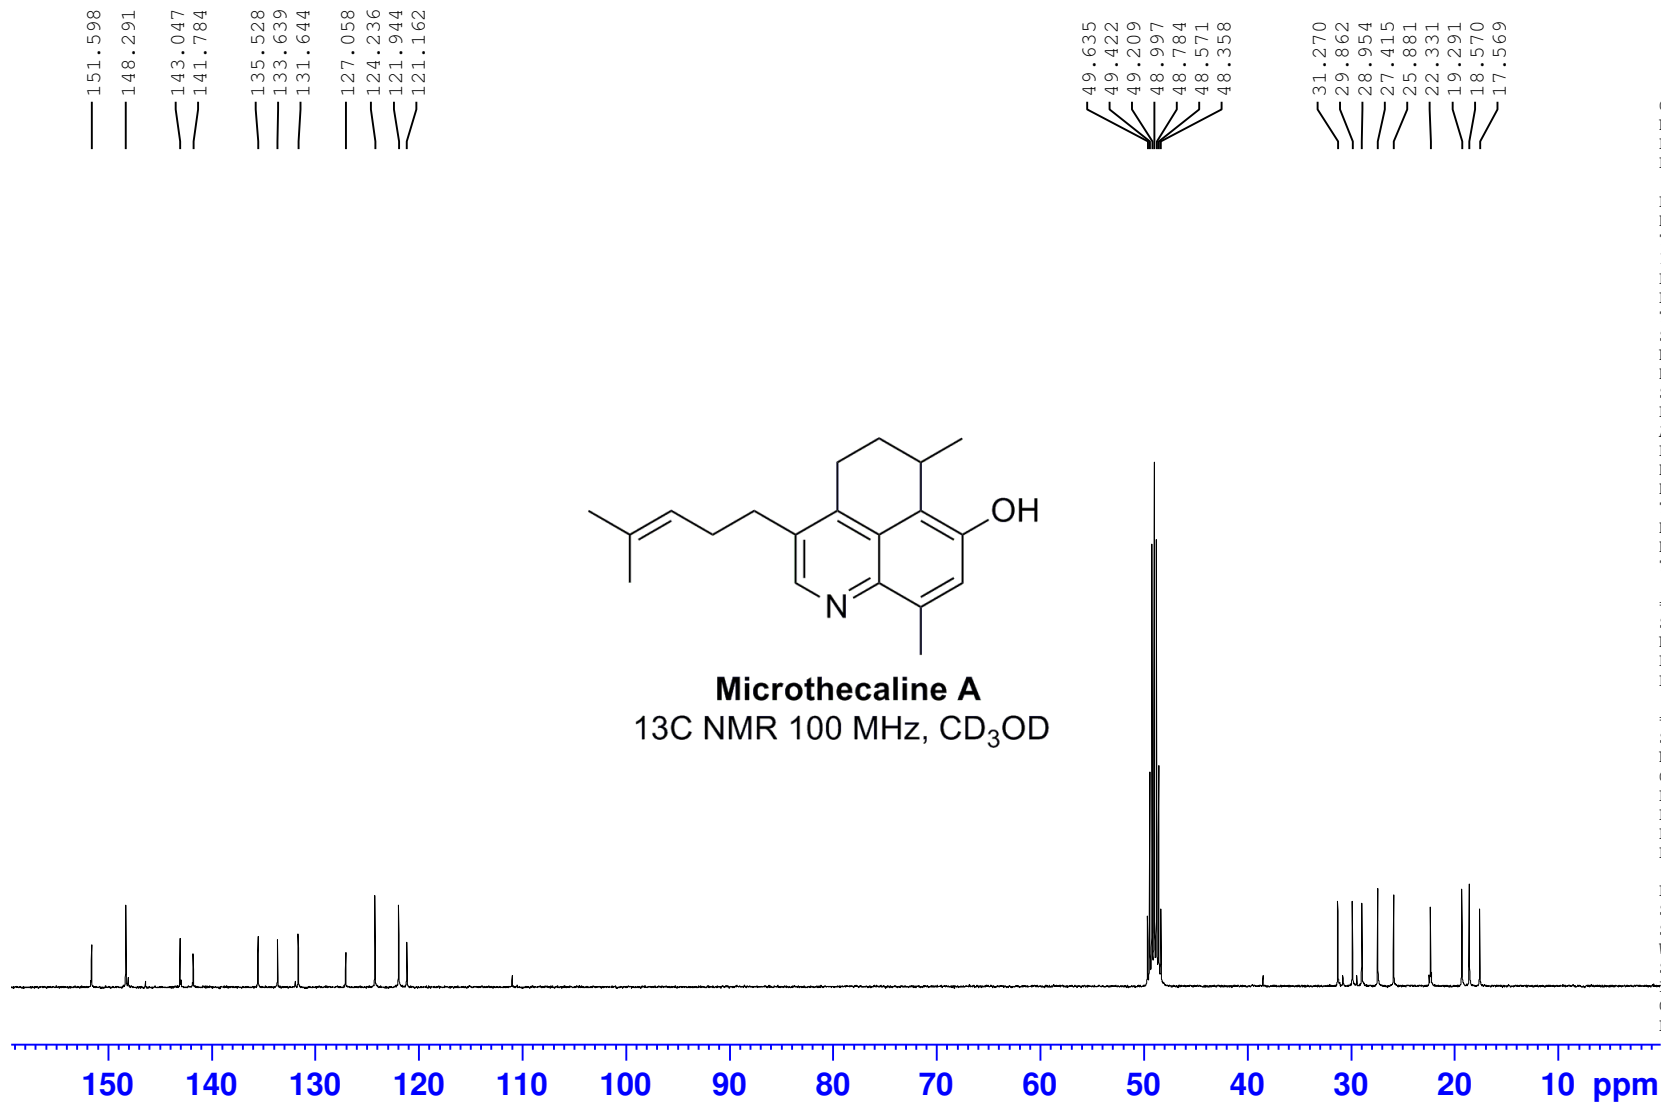

Current Data Parameters  
 NAME 511903C0643  
 EXPNO 2  
 PROCNO 1

F2 - Acquisition Parameters  
 Date\_ 20190324  
 Time 3.27  
 INSTRUM spect  
 PROBHD 5 mm PABBO BB/  
 PULPROG zgpg30  
 TD 65536  
 SOLVENT MeOD  
 NS 1024  
 DS 4  
 SWH 24038.461 Hz  
 FIDRES 0.366798 Hz  
 AQ 1.3631488 sec  
 RG 195.29  
 DW 20.800 usec  
 DE 6.50 usec  
 TE 298.3 K  
 D1 3.00000000 sec  
 D11 0.03000000 sec  
 TD0 1

===== CHANNEL f1 =====  
 SFO1 100.6228293 MHz  
 NUC1 13C  
 P1 10.00 usec  
 PLW1 78.0000000 W

===== CHANNEL f2 =====  
 SFO2 400.1316005 MHz  
 NUC2 1H  
 CPDPRG[2] waltz16  
 PCPD2 90.00 usec  
 PLW2 16.00000000 W  
 PLW12 0.18777999 W  
 PLW13 0.15210000 W

F2 - Processing parameters  
 SI 32768  
 SF 100.6126299 MHz  
 WDW EM  
 SSB 0  
 LB 2.00 Hz  
 GB 0  
 PC 1.40

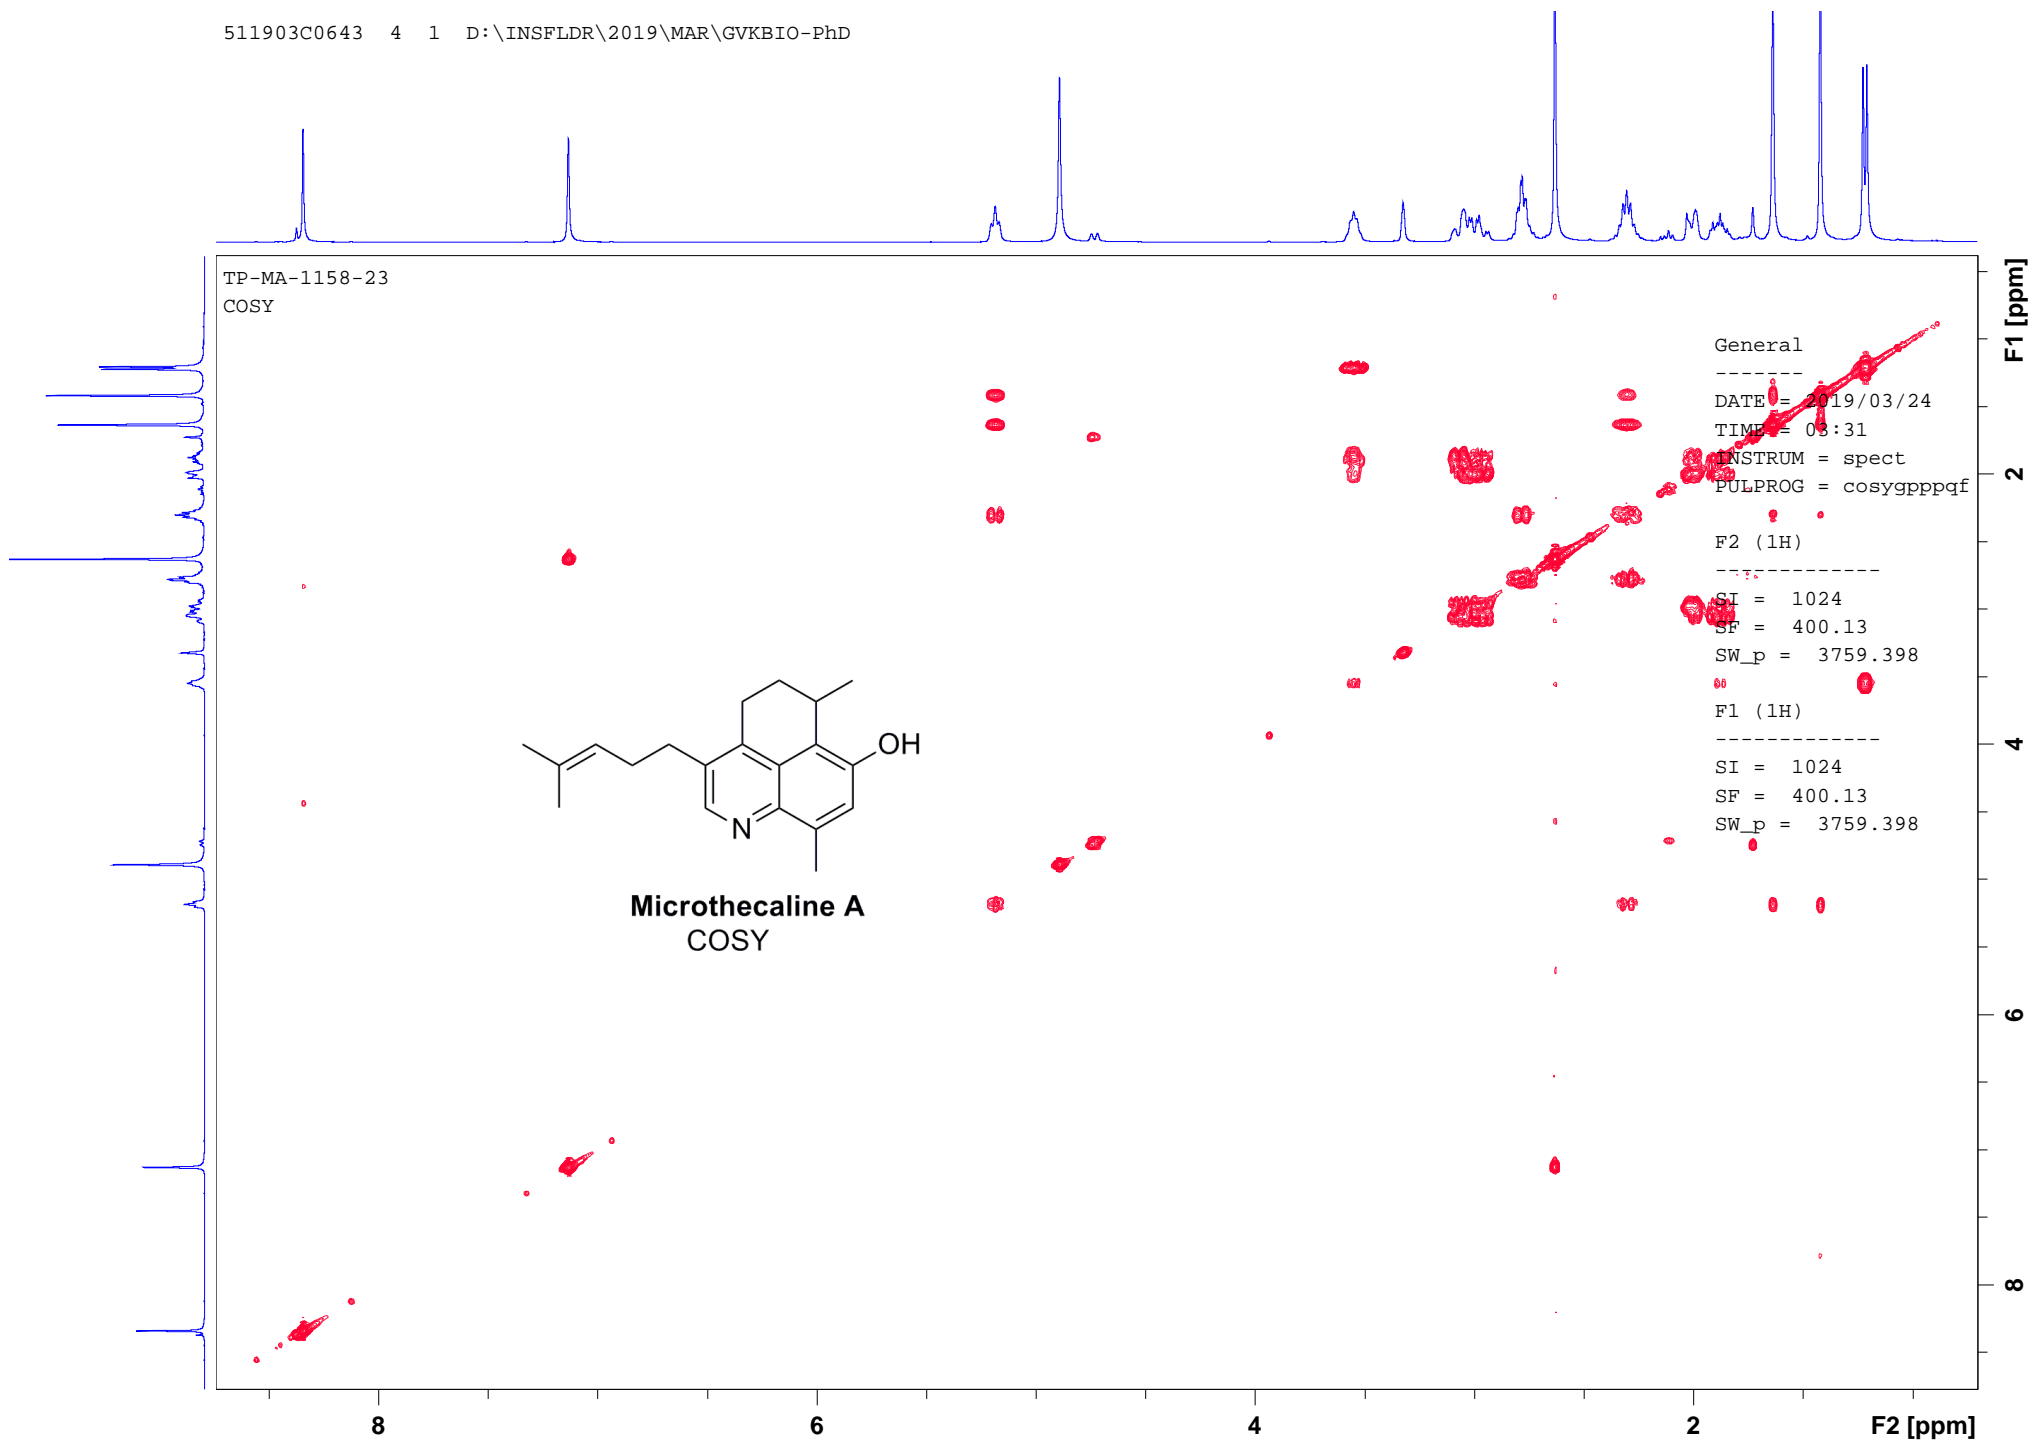

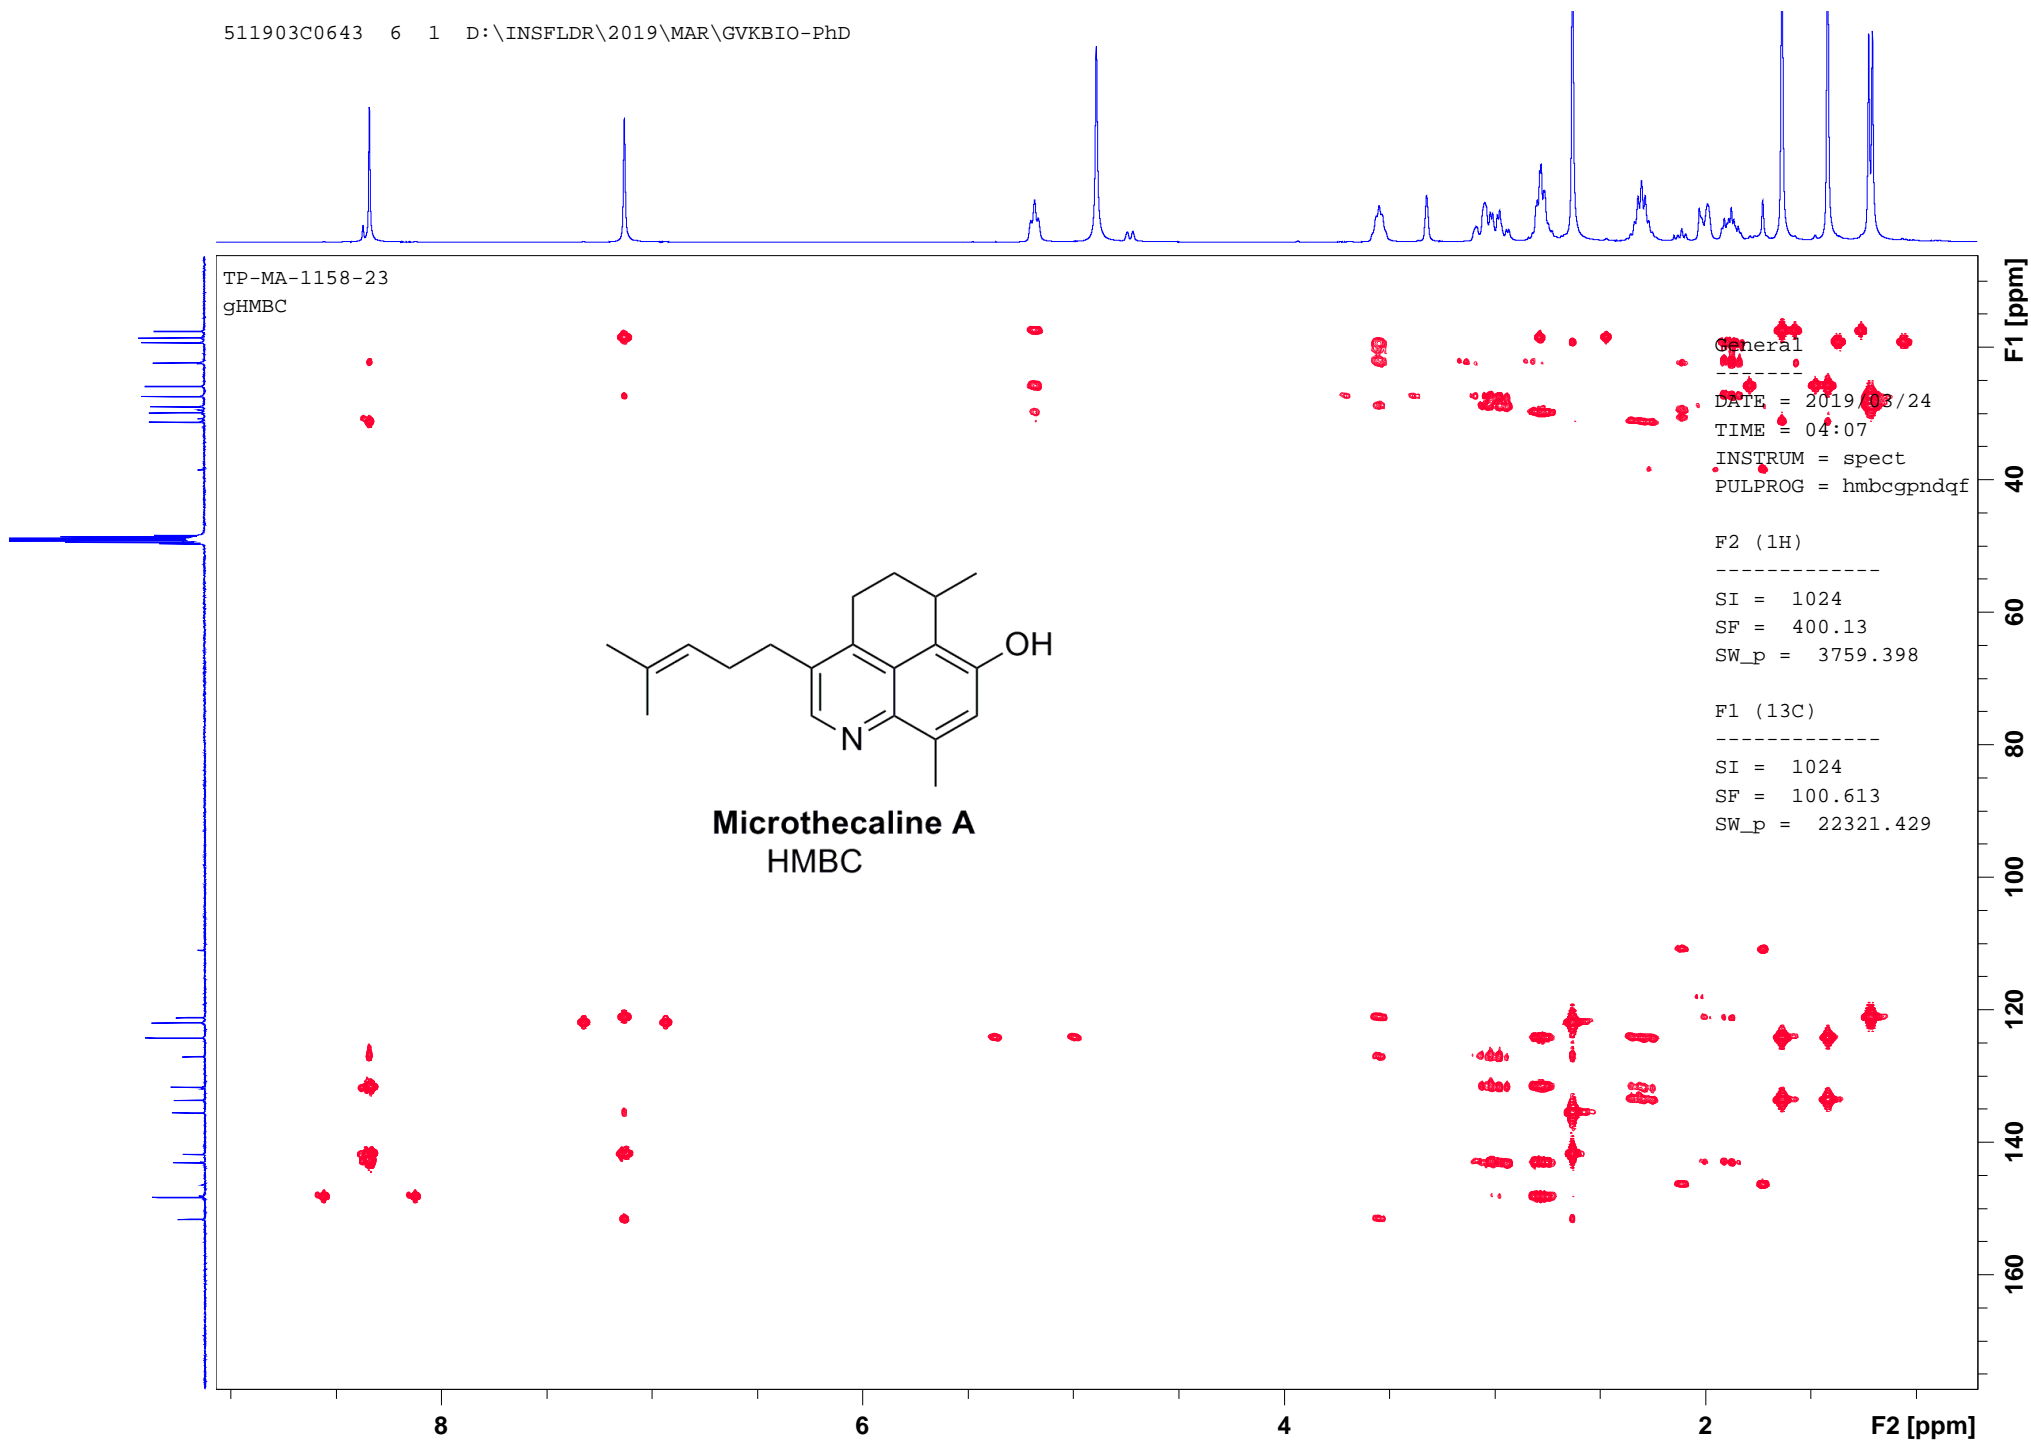

TP-MA-1158-23  
HSQC

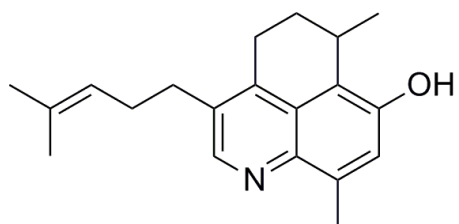

**Microthecaline A**  
HSQC

General

-----  
DATE = 2019/03/24  
TIME = 03:51  
INSTRUM = spect  
PULPROG = hsqcedetgp

F2 (1H)

-----  
SI = 1024  
SF = 400.13  
SW\_p = 3759.398

F1 (13C)

-----  
SI = 1024  
SF = 100.613  
SW\_p = 20161.29

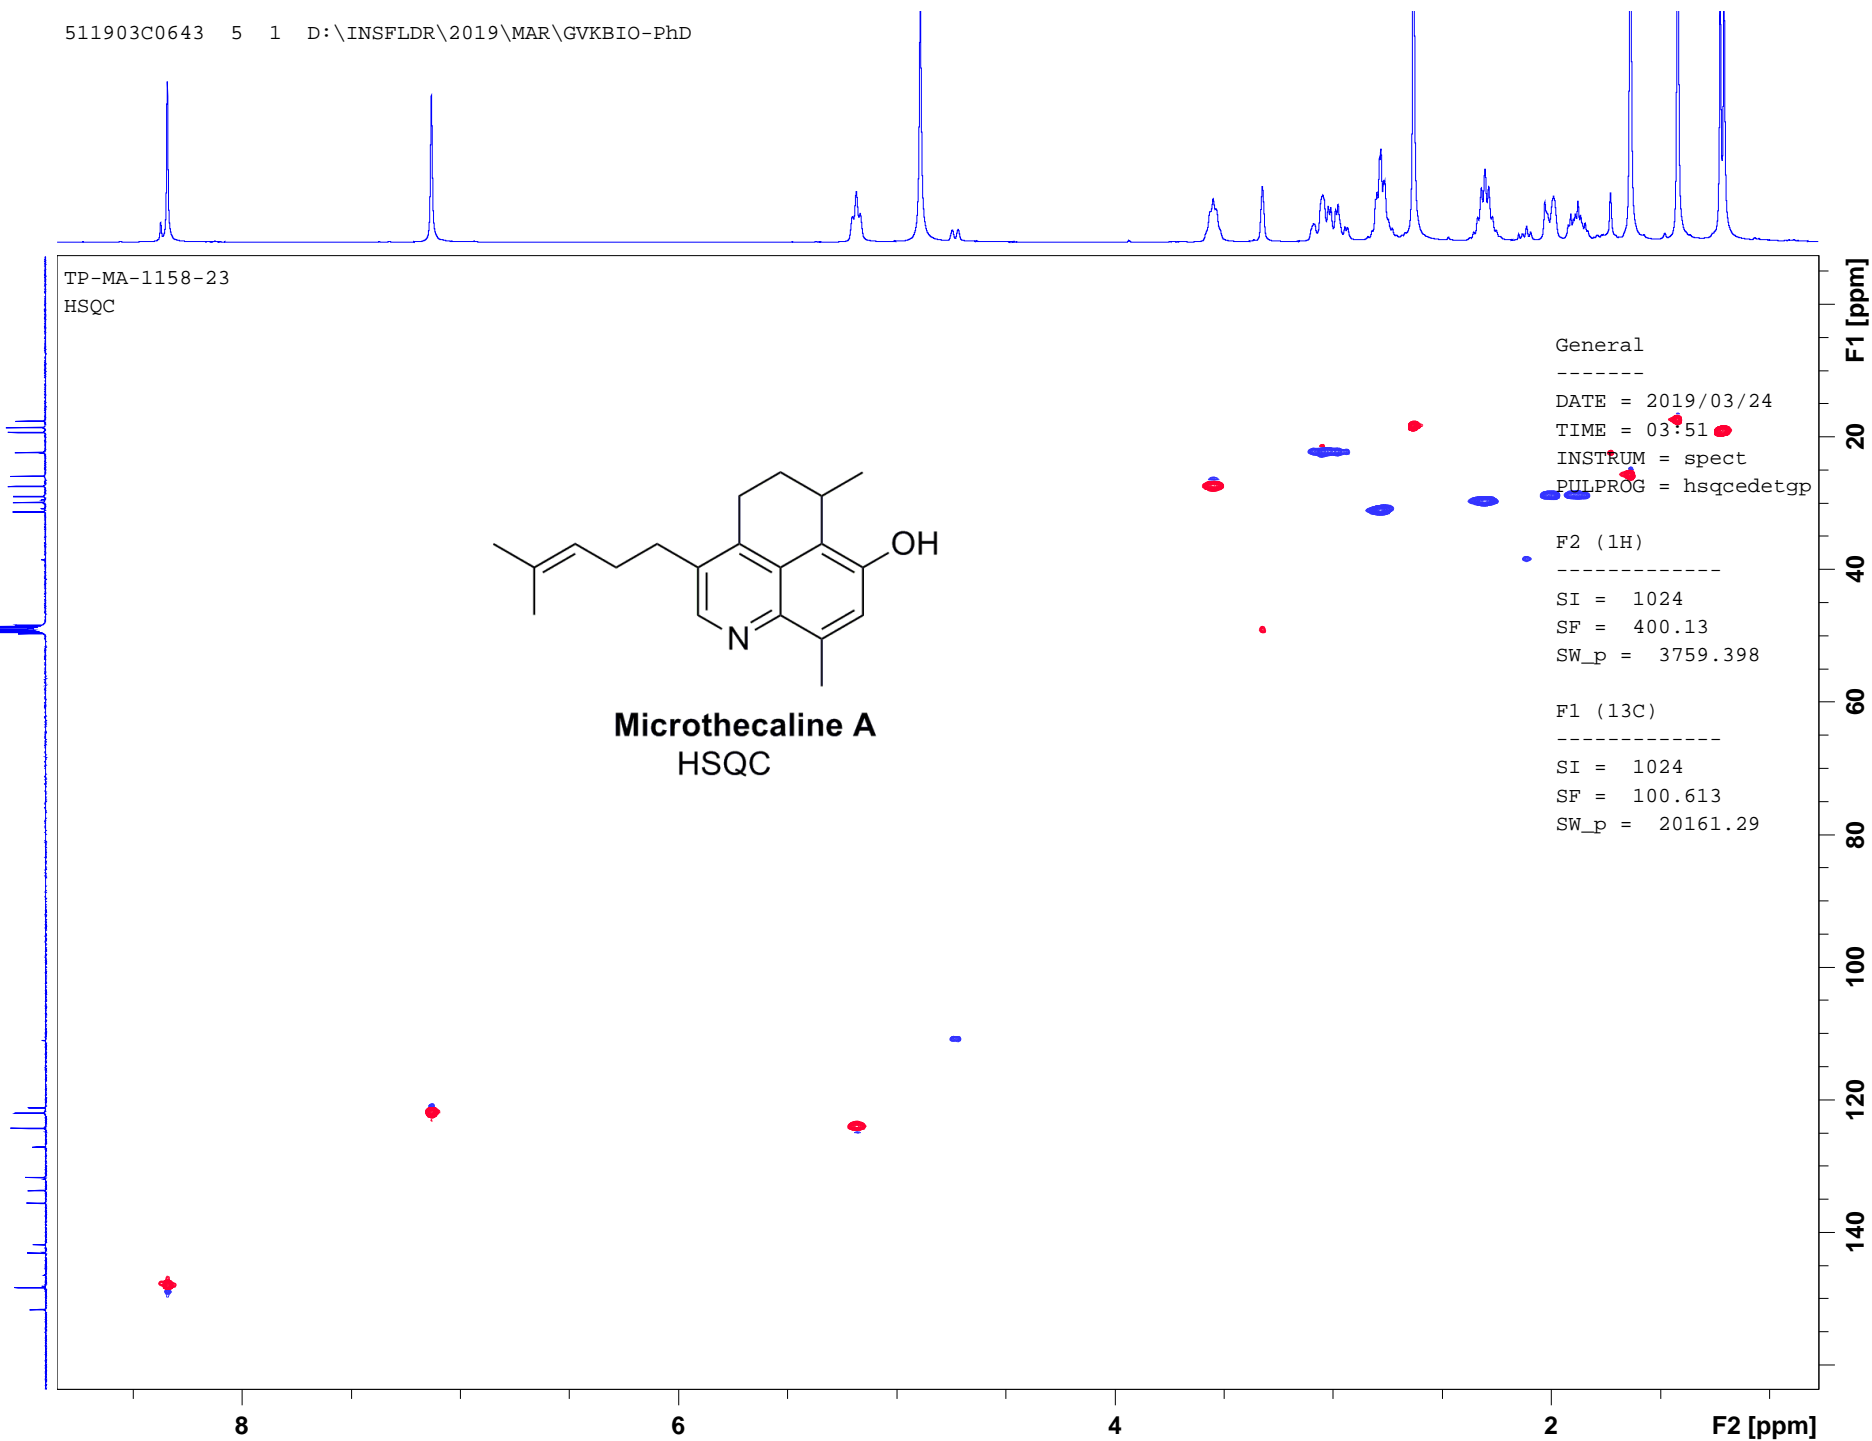



TP-MA-1158-23 (TFA)

156.879  
154.972  
141.005  
135.163  
133.727  
131.408  
129.275  
128.800  
127.341  
123.521  
123.344

49.666  
49.497  
49.326  
49.156  
48.986  
48.814  
48.646  
30.937  
29.065  
28.314  
27.212  
25.988  
24.103  
18.811  
17.794  
17.266

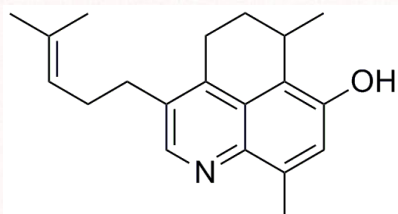

Microthecaline A (added traces of TFA)  
13C NMR 125 MHz, CD<sub>3</sub>OD

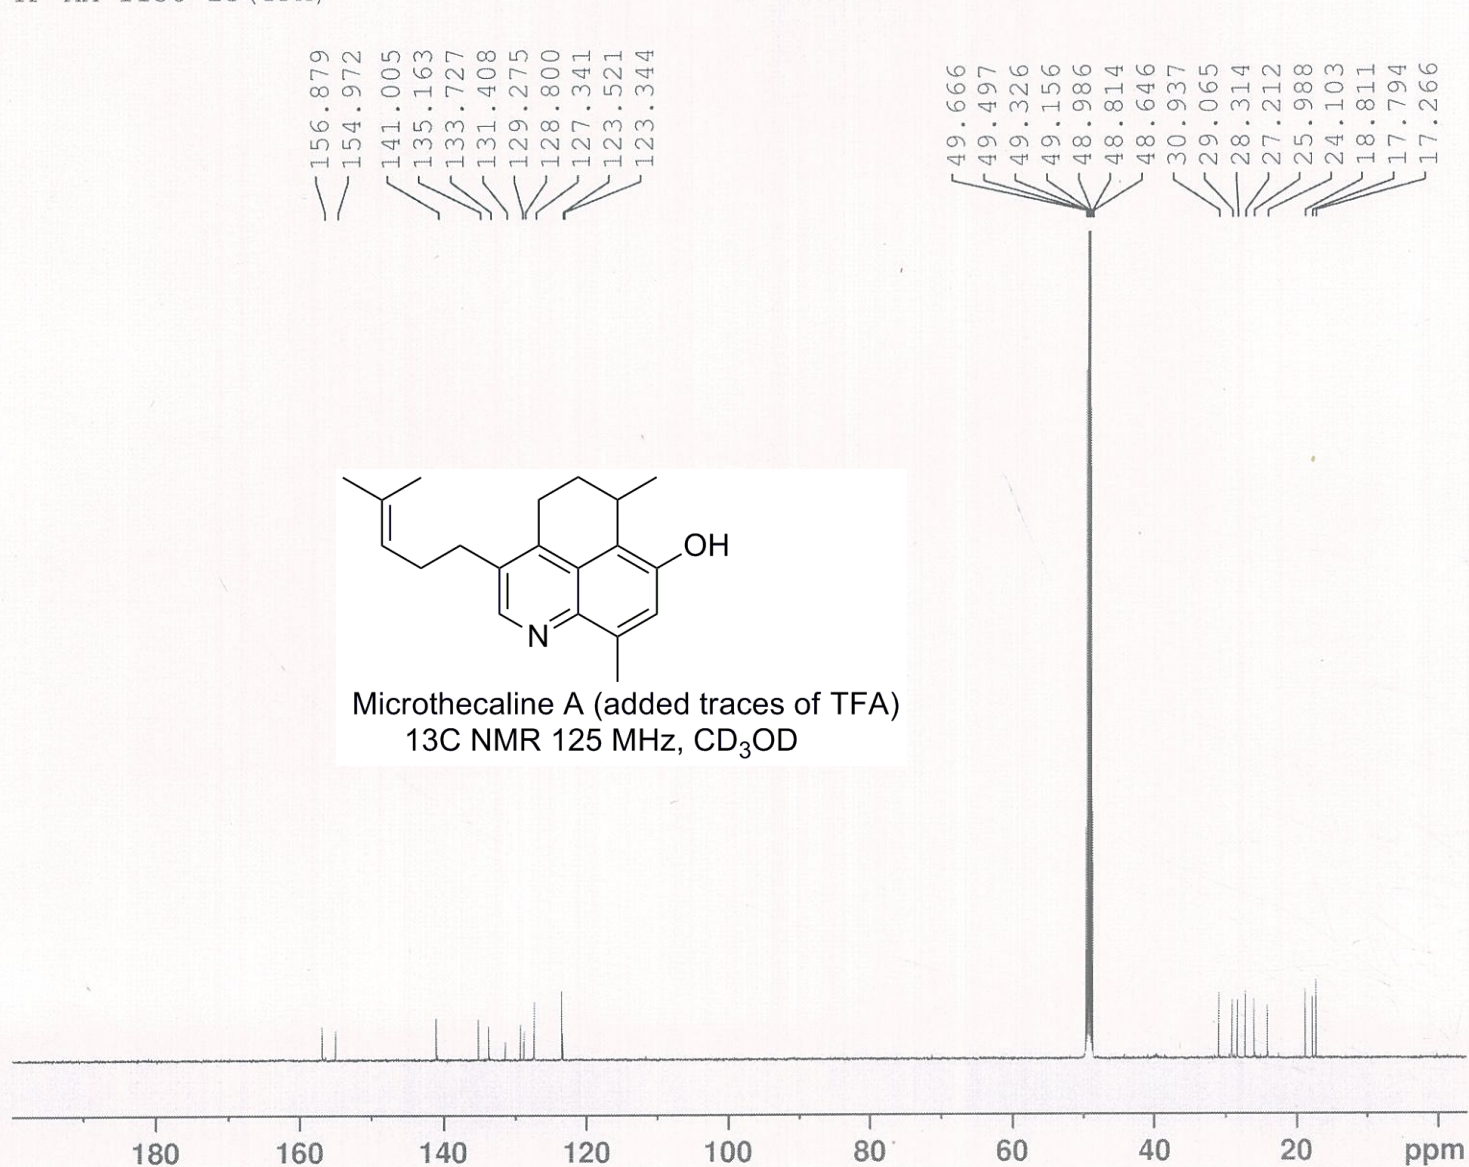

Current Data Parameters  
NAME 511907A7649  
EXPNO 2  
PROCNO 1

F2 - Acquisition Parameters  
Date\_ 20190710  
Time 4.04 h  
INSTRUM spect  
PROBHD Z119470\_0294 (  
PULPROG zgpg30  
TD 65536  
SOLVENT MeOD  
NS 1500  
DS 4  
SWH 29761.904 Hz  
FIDRES 0.908261 Hz  
AQ 1.1010048 sec  
RG 197.72  
DW 16.800 usec  
DE 6.50 usec  
TE 298.3 K  
D1 3.00000000 sec  
D11 0.03000000 sec  
TD0 1  
SFO1 125.7703643 MHz  
NUC1 13C  
P1 10.00 usec  
PLW1 79.88800049 W  
SFO2 500.1320005 MHz  
NUC2 1H  
CPDPRG[2] waltz16  
PCPD2 80.00 usec  
PLW2 20.38699913 W  
PLW12 0.31854999 W  
PLW13 0.16023000 W

F2 - Processing parameters  
SI 32768  
SF 125.7575932 MHz  
WDW EM  
SSB 0  
LB 1.00 Hz  
GB 0  
PC 1.40

| Position                | <sup>1</sup> H & <sup>13</sup> C NMR values of isolated Microthecaline A (with TFA) |                                 | <sup>1</sup> H & <sup>13</sup> C NMR values of synthesized (±)- Microthecaline A |                                 | <sup>1</sup> H & <sup>13</sup> C NMR values of synthesized (±)- Microthecaline A after addition of TFA |                                 |
|-------------------------|-------------------------------------------------------------------------------------|---------------------------------|----------------------------------------------------------------------------------|---------------------------------|--------------------------------------------------------------------------------------------------------|---------------------------------|
|                         | <sup>13</sup> C (150 MHz)                                                           | <sup>1</sup> H values (600 MHz) | <sup>13</sup> C (100 MHz)                                                        | <sup>1</sup> H values (400 MHz) | <sup>13</sup> C (125 MHz)                                                                              | <sup>1</sup> H values (400 MHz) |
| 1                       | 27.0, CH                                                                            | 3.65, m                         | 27.4 CH                                                                          | 3.55, m                         | 27.2, CH                                                                                               | 3.67, m                         |
| 2 $\alpha$<br>2 $\beta$ | 28.2, CH <sub>2</sub>                                                               | 2.01, dddd<br>2.16, dddd        | 28.9, CH <sub>2</sub>                                                            | 1.91, m<br>2.04, m              | 28.3, CH <sub>2</sub>                                                                                  | 2.02, m<br>2.16, m              |
| 3 $\alpha$<br>3 $\beta$ | 23.9, CH <sub>2</sub>                                                               | 3.38, ddd<br>3.25, ddd          | 22.3, CH <sub>2</sub>                                                            | 3.09-3.14, m<br>3.01-3.06, m    | 24.1, CH <sub>2</sub>                                                                                  | 3.35, m                         |
| 4                       | 156.4, C                                                                            |                                 | 143.0, C                                                                         |                                 | 156.8, C                                                                                               |                                 |
| 5                       | 131.4, C                                                                            |                                 | 141.8, C                                                                         |                                 | 131.4, C                                                                                               |                                 |
| 6                       | 129.2, C                                                                            |                                 | 135.5, C                                                                         |                                 | 129.2, C                                                                                               |                                 |
| 7                       | 127.1, CH                                                                           | 7.49, s                         | 121.9, CH                                                                        | 7.12, s                         | 127.3, CH                                                                                              | 7.49, s                         |
| 8                       | 154.7, C                                                                            |                                 | 151.5, C                                                                         |                                 | 154.9, C                                                                                               |                                 |
| 9                       | 123.1, C                                                                            |                                 | 121.2 C                                                                          |                                 | 123.3, C                                                                                               |                                 |
| 10                      | 128.6, C                                                                            |                                 | 127.1, C                                                                         |                                 | 128.8, C                                                                                               |                                 |
| 11                      | 133.5, C                                                                            |                                 | 131.6, C                                                                         |                                 | 133.7, C                                                                                               |                                 |
| 12                      | 30.8, CH <sub>2</sub>                                                               | 3.02, t                         | 31.3, CH <sub>2</sub>                                                            | 2.83, m                         | 30.9, CH <sub>2</sub>                                                                                  | 3.03, t                         |
| 13                      | 28.9, CH <sub>2</sub>                                                               | 2.44, m                         | 29.9, CH <sub>2</sub>                                                            | 2.34, m                         | 29.0, CH <sub>2</sub>                                                                                  | 2.44, m                         |
| 14                      | 123.3, CH                                                                           | 5.23, t                         | 124.2, CH                                                                        | 5.21, t                         | 123.5, CH                                                                                              | 5.23, t                         |
| 15                      | 135.0, C                                                                            |                                 | 133.6, C                                                                         |                                 | 135.1, C                                                                                               |                                 |
| 16                      | 25.8, CH <sub>3</sub>                                                               | 1.67, s                         | 25.9, CH <sub>3</sub>                                                            | 1.65, s                         | 25.9, CH <sub>3</sub>                                                                                  | 1.67, s                         |
| 17                      | 17.6, CH <sub>3</sub>                                                               | 1.45, s                         | 17.5, CH <sub>3</sub>                                                            | 1.43, s                         | 17.7, CH <sub>3</sub>                                                                                  | 1.43, s                         |
| 18                      | 141.0, CH                                                                           | 8.57, s                         | 148.3, CH                                                                        | 8.35, s                         | 141.0, CH                                                                                              | 8.55, s                         |
| 19                      | 17.1, CH <sub>3</sub>                                                               | 2.74, s                         | 18.5, CH <sub>3</sub>                                                            | 2.63, s                         | 17.2, CH <sub>3</sub>                                                                                  | 2.73, s                         |
| 20                      | 18.7, CH <sub>3</sub>                                                               | 1.27, d                         | 19.3, CH <sub>3</sub>                                                            | 1.23, d                         | 18.8, CH <sub>3</sub>                                                                                  | 1.28, d                         |

(a) All the <sup>1</sup>H & <sup>13</sup>C NMRs were recorded in CD<sub>3</sub>OD solvent.

(b) As per the original paper on isolation and characterization of microthecaline A, methanol and trifluoroacetic acid (TFA) were used to elute the compound. Subsequently solvents were evaporated prior to <sup>1</sup>H and <sup>13</sup>C NMR spectroscopy. Taking this into account we decided to add TFA to the synthesized microthecaline sample, evaporated it and then recorded its <sup>1</sup>H and <sup>13</sup>C NMR spectra, which gave us direct correlation with the reported molecule.

(c) All the NMR experiments were done at 30 °C; same as reported by Davis et al.

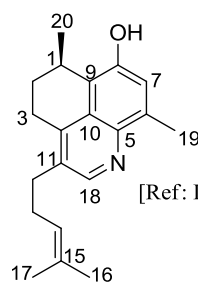

[Ref: Davis et al. J Nat Prod, 2018, 81, 1079-1083]
